# Supplementary material for: Arylopeptoid oligomers functionalised by combinatorial or sequential on-resin click chemistry using a copper(i)–N-heterocyclic carbene catalyst
Source: Royal Society of Chemistry journal article supplement (doi:10.1039/d2ob00163b), 2022-01-01
Supplement: d2ob00163b1.pdf [file d2ob00163b1.pdf]

## Supporting information

### Table of contents

|                                                                                  |    |
|----------------------------------------------------------------------------------|----|
| 1-General information.....                                                       | 3  |
| 2-General procedures.....                                                        | 4  |
| 2.1- Synthesis of alkyne substituted peptoids (General procedure <b>A</b> )..... | 4  |
| 2.2- Click reaction on support: general procedure <b>B</b> .....                 | 5  |
| 3-Synthesis and Characterization data of arylopeptoid trimers.....               | 6  |
| 3.1-meta-arylopeptoid trimer <b>III-3(Alk<sub>2</sub>)</b> .....                 | 6  |
| 3.2- meta-arylopeptoid trimer <b>III-3(a<sub>2</sub>)</b> . ....                 | 8  |
| 3.3- meta-arylopeptoid trimer, <b>III-3(b<sub>2</sub>)</b> . ....                | 10 |
| 3.4-meta-arylopeptoid trimer <b>III-3(c<sub>2</sub>)</b> .....                   | 12 |
| 3.5- meta-arylopeptoid trimer <b>III-3(d<sub>2</sub>)</b> . ....                 | 14 |
| 3.6- meta-arylopeptoid trimer, <b>III-3(e<sub>2</sub>)</b> . ....                | 16 |
| 4- Synthesis and Characterization data of arylopeptoid tetramers. ....           | 18 |
| 4.1- meta-arylopeptoid tetramer, <b>II-4-(Alk<sub>2,4</sub>)</b> .....           | 18 |
| 4.2- Homo clicked arylopeptoids.....                                             | 20 |
| 4.2.1- meta-arylopeptoid tetramer, <b>III-4(a<sub>2,4</sub>)</b> . ....          | 20 |
| 4.2.2- meta-arylopeptoid tetramer, <b>III-4(b<sub>2,4</sub>)</b> ....            | 21 |
| 4.2.3- meta-arylopeptoid tetramer, <b>III-4(c<sub>2,4</sub>)</b> . ....          | 22 |
| 4.2.4- meta-arylopeptoid tetramer, <b>III-4(d<sub>2,4</sub>)</b> . ....          | 23 |
| 4.2.5- meta-arylopeptoid tetramer, <b>III-4(e<sub>2,4</sub>)</b> . ....          | 24 |
| 4.3- Combinatorial on arylopeptoid tetramers ....                                | 25 |
| 4.3.1- meta-arylopeptoid tetramer, <b>III-4(a,b)(2,4)</b> .....                  | 25 |
| 4.3.2- meta-arylopeptoid tetramer <b>III-4(a,d)(2,4)</b> .....                   | 27 |
| 4.3.3- meta-arylopeptoid tetramer <b>III-4(b,c)(2,4)</b> . ....                  | 30 |
| 4.3.1- meta-arylopeptoid tetramer <b>III-4(c,d)(2,4)</b> . ....                  | 33 |
| 4.3.4- meta-arylopeptoid tetramer, <b>III-4(d,e)(2,4)</b> .....                  | 35 |
| 5- Synthesis and Characterization data of arylopeptoid hexamers.....             | 37 |
| 5.1.1-meta-arylopeptoid hexamer, <b>III-6(Alk<sub>3,6</sub>)</b> . ....          | 37 |
| 5.2-meta-arylopeptoid hexamer, <b>III-6(a<sub>3,6</sub>)</b> . ....              | 39 |

|                                                                                                     |    |
|-----------------------------------------------------------------------------------------------------|----|
| 5.2- Starting material, <b>III-6(Alk<sub>2,4,6</sub>)</b> . .....                                   | 41 |
| 5.2- Homo-clicked arylopeptoids .....                                                               | 43 |
| 5.2.1- meta-arylopeptoid hexamer, <b>III-6(a<sub>2,4,6</sub>)</b> . .....                           | 43 |
| 5.2.2- meta-arylopeptoid hexamer, <b>III-6(b<sub>2,4,6</sub>)</b> . .....                           | 45 |
| 5.2.3- meta-arylopeptoid hexamer, <b>III-6(c<sub>2,4,6</sub>)</b> . .....                           | 47 |
| 5.2.4- meta-arylopeptoid hexamer, <b>III-6(d<sub>2,4,6</sub>)</b> . .....                           | 48 |
| 5.2.5- meta-arylopeptoid hexamer, <b>III-6(e<sub>2,4,6</sub>)</b> . .....                           | 49 |
| 5.3- Combinatorial on hexamer.....                                                                  | 50 |
| 5.3.1- Meta-arylopeptoid hexamer <b>III-6(a,c)(2,4,6)</b> . .....                                   | 50 |
| 5.3.2- meta-arylopeptoid hexamer, <b>III-6(a,d)(2,4,6)</b> . .....                                  | 53 |
| 5.3.3- meta-arylopeptoid hexamer, <b>III-6(b,c)(2,4,6)</b> . .....                                  | 55 |
| 5.3.3- meta-arylopeptoid hexamer, <b>III-6(b,d)(2,4,6)</b> . .....                                  | 59 |
| 5.3.4- meta-arylopeptoid hexamer, <b>III-6(c,d)(2,4,6)</b> . .....                                  | 62 |
| 5.3.5- Meta-arylopeptoid hexamer, <b>III-6(d,e)(2,4,6)</b> .....                                    | 64 |
| 6-Sequential click to access regioisomers .....                                                     | 66 |
| 6.1- Synthetic paths.....                                                                           | 66 |
| 6.1.1. Synthetic path for <b>III-6(a<sub>2</sub>,c<sub>4,6</sub>)</b> .....                         | 66 |
| 6.1.2. Synthetic path for <b>III-6(a<sub>4</sub>,c<sub>2,6</sub>)</b> .....                         | 67 |
| 6.1.3. Synthetic path for <b>III-6(a<sub>6</sub>,c<sub>2,4</sub>)</b> .....                         | 68 |
| 6.1.4. Synthetic path for <b>III-6(a<sub>2,4</sub>,c<sub>6</sub>)</b> .....                         | 69 |
| 6.1.5- Synthetic path for <b>III-6(a<sub>4,6</sub>,c<sub>2</sub>)</b> .....                         | 70 |
| 6.1.6. Synthetic path for <b>III-6(a<sub>2,6</sub>,c<sub>4</sub>)</b> .....                         | 71 |
| 6.2- Characterisation data .....                                                                    | 72 |
| 6.2.1- Synthesis of meta-arylopeptoid hexamer, <b>III-6-(a<sub>2</sub>,c<sub>4,6</sub>)</b> : ..... | 72 |
| 6.2.2-Synthesis of meta-arylopeptoid hexamer, <b>III-6-(a<sub>4</sub>,c<sub>2,6</sub>)</b> : .....  | 73 |
| 6.2.3- Synthesis of meta-arylopeptoid hexamer, <b>III-6-(a<sub>6</sub>,c<sub>2,4</sub>)</b> : ..... | 74 |
| 6.2.4- Synthesis of meta-arylopeptoid hexamer, <b>III-6-(a<sub>2,4</sub>,c<sub>6</sub>)</b> : ..... | 75 |
| 6.2.6- Synthesis of meta-arylopeptoid hexamer, <b>III-6-(a<sub>2,6</sub>,c<sub>4</sub>)</b> : ..... | 77 |
| 6.2.7- Synthesis of meta-arylopeptoid hexamer, <b>III-4(d<sub>2</sub>,e<sub>4</sub>)</b> : .....    | 78 |
| 6.2.8- Synthesis of meta-arylopeptoid Hexamer, <b>III-4(e<sub>2</sub>,d<sub>4</sub>)</b> : .....    | 79 |
| 7-Table of retention times.....                                                                     | 80 |
| 8-References .....                                                                                  | 81 |

## 1-General information

Chemicals: Rink amine resin (0.62mmol/g loading) was obtained from Novabiochem, piperidine and dichloromethane from Carlo Erba; 3-chloromethylbenzoylchloride, TFA, DIPEA, isopropyl, and propargyl amines from TCI; *N*-methylpyrrolidone from Alfa Aesar and DMSO from Acros. Benzyl azide (**1a**)<sup>1</sup>, (azidomethyl)cyclohexane (**1b**)<sup>2</sup>, *tert*-butyl azido acetate (**1c**)<sup>3</sup>, *tert*-butyl (2-azidoethyl)carbamate (**1d**)<sup>4</sup> and 3-azido propane-1-ol (**1e**)<sup>5</sup> were synthesized according to literature procedures. 10 mL jacketed reactors were purchased from Kamush and thermo-regulated using a Lauda thermostat. NMR was recorded on Bruker advance 400 spectrometer. Purification was performed on a Buchi Pure Chromatography system.

Analytical HPLC was recorded on an Hitachi liquid chromatograph (Oven 5310, 30°C; Pump 5160; DAD detector 5430) equipped with a C18 Acclaim column (4.6mm×250mm, 5µm, 120Å). Detection wavelength was 240nm or 280nm and flow rate 0.5mL/min. Gradient elution used (A) water/0.1% TFA; (B) methanol according Method A: (Solvents A/B: 0 to 5 minutes isocratic at 95/5; 5 to 25 minutes gradient to 5/95; 25 to 35 minutes isocratic at 5/95; 35 to 45 minutes gradient to 95/5; 45 to 50 minutes 95/5) or Method B (Solvents A/B: 0 to 5 minutes isocratic at 95/5; 5 to 10 minutes gradient to 75/25; 10 to 50 minutes gradient to 40/60; 50 to 65 minutes gradient to 5/95; 65 to 70 minutes isocratic at 5/95; 70 to 80 minutes gradient to 95/5).

Reactions kinetics were carried out in a THT Micro Reaction Calorimeter, which allows continuous monitoring of the instantaneous enthalpy exchanged by the reactor. The sample vessel consists in a 1.5 ml septum-cap vial equipped with a magnetic stirrer. The system operates by comparing the heat exchanged (*q*) in the reaction sample vessel compared with that from a reference compartment.

Fraction conversion is given by the:

$$\% (t) = \frac{\int_0^t q \cdot dt}{\int_0^{\infty} q \cdot dt}$$

Integrations were determined using a house build python programme using the trapezoid method. Time constant of the system was measured to 50s<sup>-1</sup> and was not used for correction. A typical example for heat flow (mW) versus time is given below (figure left) (*C*<sub>propargyl alcohol</sub> = 0.5M, *C*<sub>benzyl azide</sub> = 0.5M Catalyst: 1mol-%). The integration method affords the following conversion versus time curve (Figure right). Conversion determined from the heat flow integration method was compared to conversions measured by NMR.

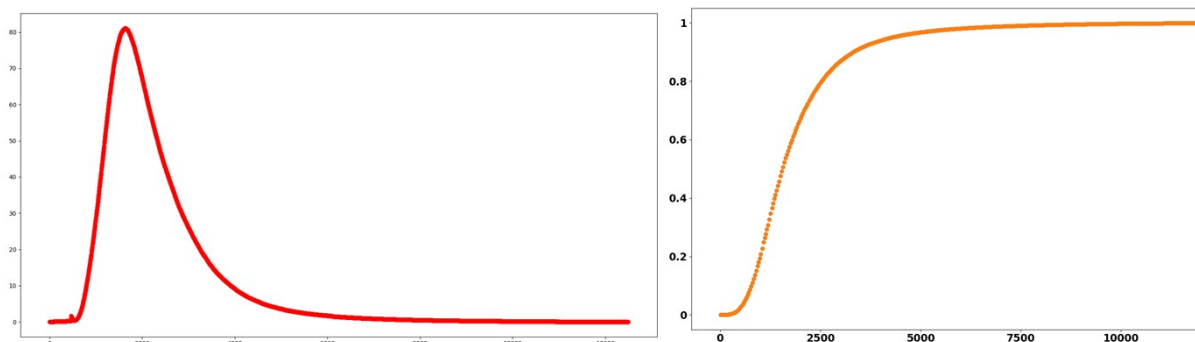

## 2-General procedures

### 2.1- Synthesis of alkyne substituted peptoids (General procedure A)

The synthesis of the *meta*-arylopeptoid hexamer was performed according to the submonomer synthesis using Rink amide resin (100-200 mesh, loading 0.54 mmol/g, novabiochem, 8.55001.0005, Batch no. S7816901016).<sup>6</sup>

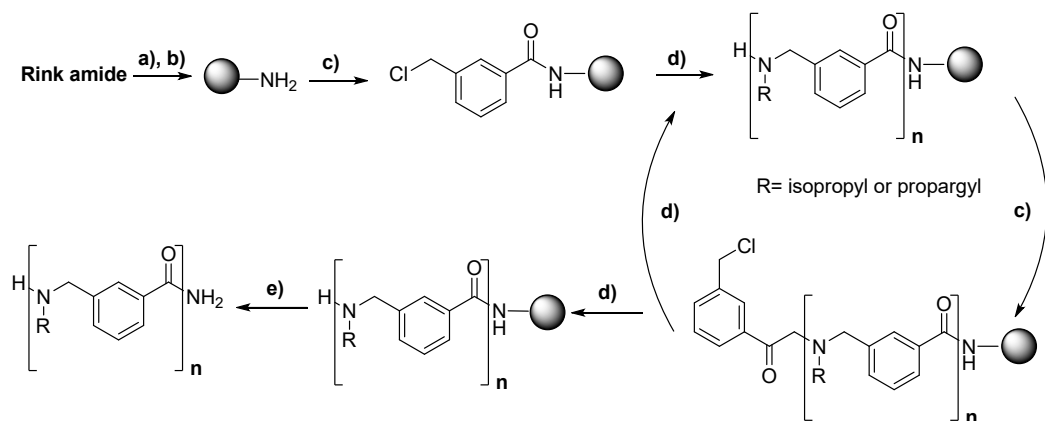

Scheme S1. Solid-phase submonomer synthesis on Rink amide resin

1-For 100mg of resin, swelling: 2 ml of CH<sub>2</sub>Cl<sub>2</sub> at RT for 10 min

2- Fmoc Deprotection: resin was washed with NMP (N-Methyl-2-pyrrolidone) (5x2ml), then piperidine/NMP 1:4 (1ml) was added and agitated for 2 min and then drained. Further piperidine/NMP 1:4 (1.0 mL) was added and the resin was agitated for 15 min, drained and washed with NMP (5x2 mL) and CH<sub>2</sub>Cl<sub>2</sub> (5x2 mL)

3- 3-chloromethylbenzoylchloride (3 equiv. per mmol loading) and DIPEA (6 equiv. per mmol loading) dissolved in 1 mL CH<sub>2</sub>Cl<sub>2</sub> were added at RT, shaken 10 minutes, then washed with CH<sub>2</sub>Cl<sub>2</sub> (5x2ml), then with DMSO (5x2ml).

4- Isopropyl or propargyl amine (20 equiv per mmol loading) dissolved in 0.5 mL of DMSO was added. The temperature was raised to 50°C for 1h then the resin was washed with DMSO (5x2ml), then with CH<sub>2</sub>Cl<sub>2</sub> (5x2ml).

Steps 2 and 3 were repeated to grow the targeted arylopeptoid oligomer until the expected sequence length.

## 2.2- Click reaction on support: general procedure B.

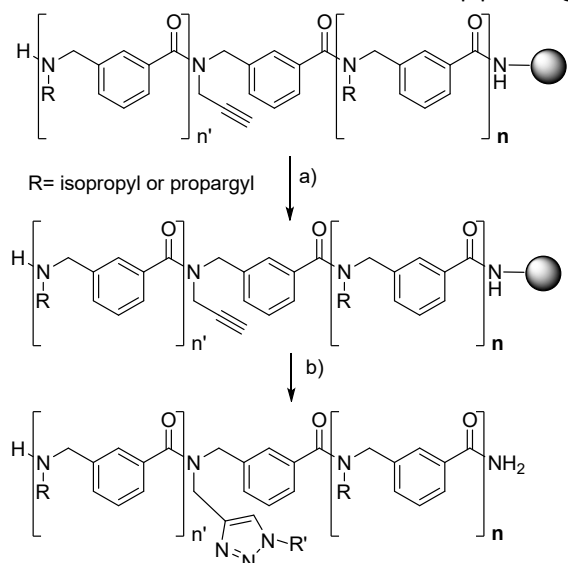

a) Azide, catalyst (5mol-% per alkyne),  $\text{CH}_2\text{Cl}_2$  / MeOH; b) Cleavage: TFA/TIS/ $\text{H}_2\text{O}$  (95:2.5:2.5).

Figure S1 General procedure B

Resin-bound arylopeptoid obtained from 100 mg of resin were introduced in a reactor containing 1 mL of  $\text{CH}_2\text{Cl}_2$ /MeOH mixture (v/v = 8:2). Azides (4.0 equiv. per alkyne) and 5 mol-% of catalyst per alkyne were added. The reactor is gently shaken for 3h at 50°C. The resin was washed with MeOH (5x2ml) at 50°C and then with  $\text{CH}_2\text{Cl}_2$  (5x2ml) at room temperature. Cleavage was performed by gently shaking in a 1 mL solution of TFA/TIS/ $\text{H}_2\text{O}$  (95:2.5:2.5) for 10 min at RT. The solution was drained out and evaporated to dryness under reduced pressure. The foam was dissolved in a minimum amount of  $\text{CH}_2\text{Cl}_2$  ( $\approx 0.4$  mL), then 30 volumes ( $\approx 12$  mL) of diethyl ether were added. The white precipitate formed was isolated after centrifugation.

### 3-Synthesis and Characterization data of arylopeptoid trimers

#### 3.1-meta-arylopeptoid trimer III-3(Alk<sub>2</sub>).

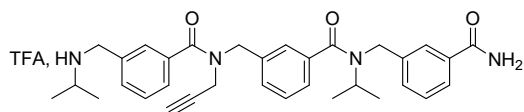

Trimer III-3(Alk<sub>2</sub>) was synthesised according general procedure A using 50 mg of RA resin (0.027mmol).

$m_{\text{crude}} = 30 \text{ mg}$  (purity 85%), crude yield 170%

$m_{\text{pure}} = 17 \text{ mg}$  (purity 100%), isolated yield 98%

HRMS (TOF MS ES<sup>+</sup>):  $m/z$  calcd for C<sub>33</sub>H<sub>39</sub>N<sub>4</sub>O<sub>3</sub> [M+H]<sup>+</sup>: 539.30167; found: 539.3013 (-0.74 ppm).

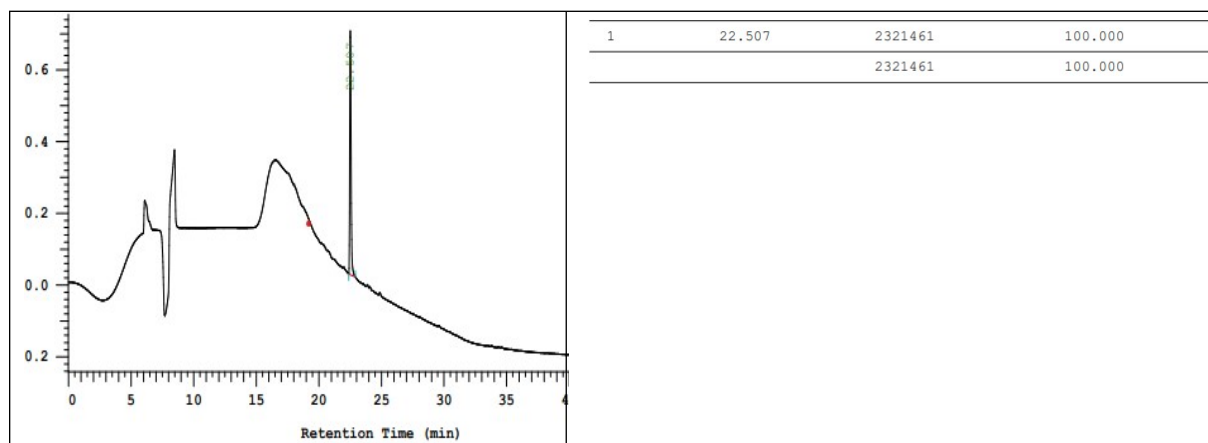

Figure S2 HPLC chromatogram of purified III-3(Alk<sub>2</sub>).

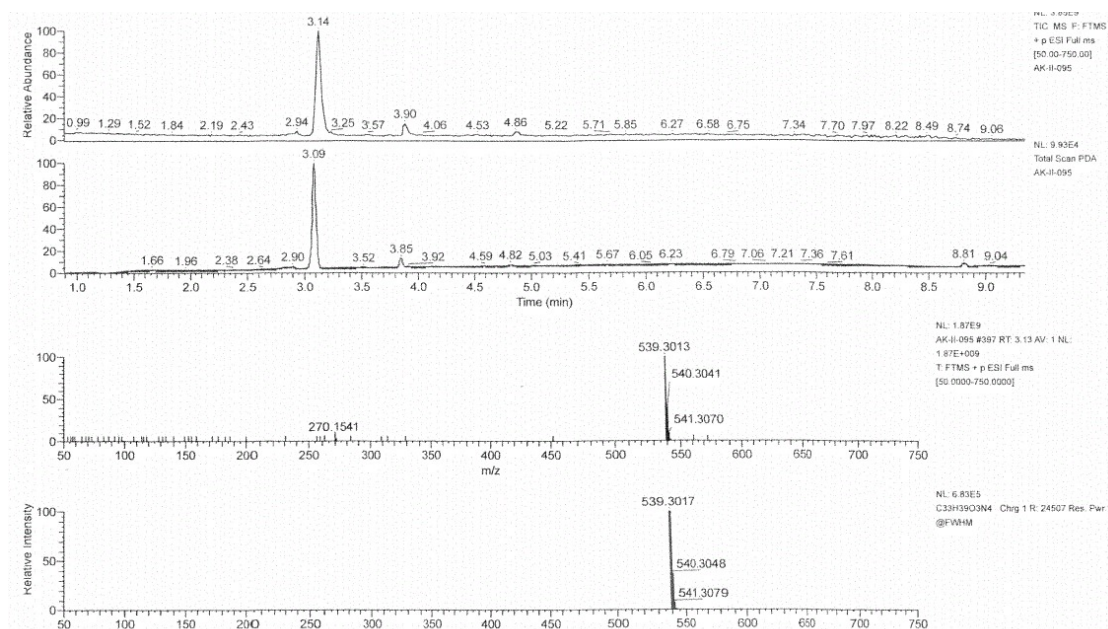

Figure S3 LCMS spectra of III-3(Alk<sub>2</sub>).

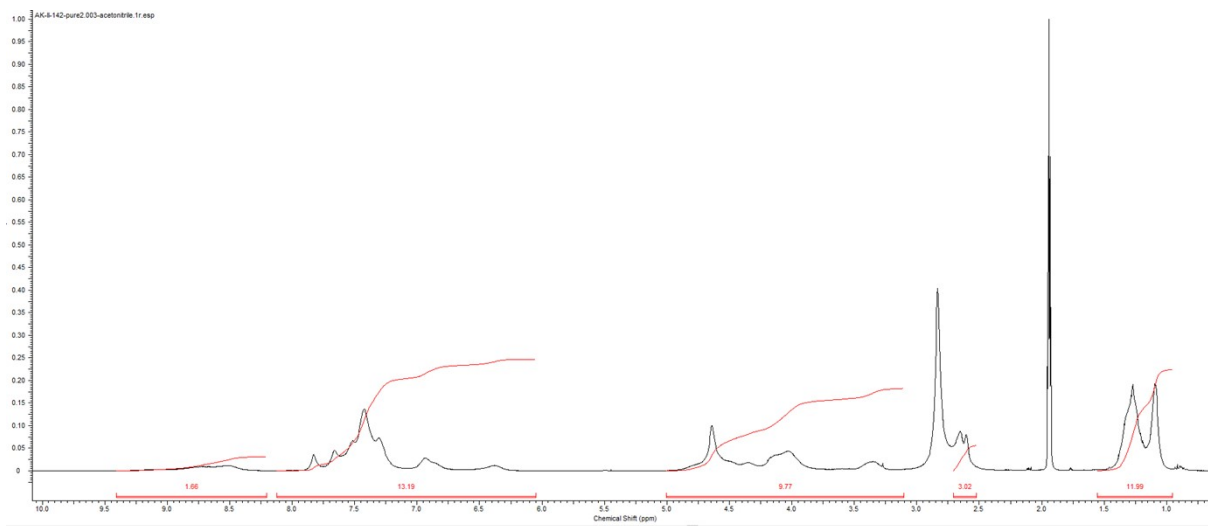

Figure S4  $^1\text{H-NMR}$  spectra in  $\text{CD}_3\text{CN}$  of **III-3(Alk<sub>2</sub>)**.

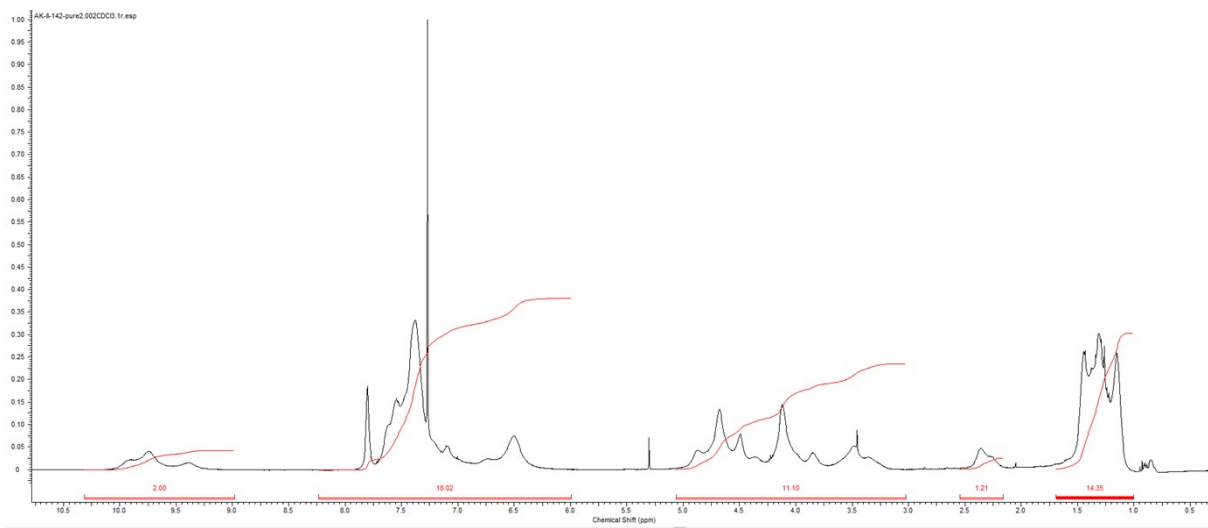

Figure S5  $^1\text{H-NMR}$  spectra in  $\text{CDCl}_3$  of **III-3(Alk<sub>2</sub>)**.

### 3.2- meta-arylopeptoid trimer III-3(a<sub>2</sub>).

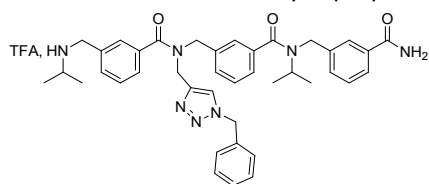

Trimer **III-3(a<sub>2</sub>)** was synthesised according general procedure A then general procedure B using 50 mg of RA resin (0.027mmol).

$m_{\text{crude}}$  = 33 mg (purity 85%), 155% crude yield

$m_{\text{pure}}$  = 20.8 mg (purity 98%), 98% isolated yield

HRMS (TOF MS ES<sup>+</sup>):  $m/z$  calcd for C<sub>40</sub>H<sub>46</sub>N<sub>7</sub>O<sub>3</sub> [M+H]<sup>+</sup>: 672.36566; found: 672.3645 (-1.73 ppm).

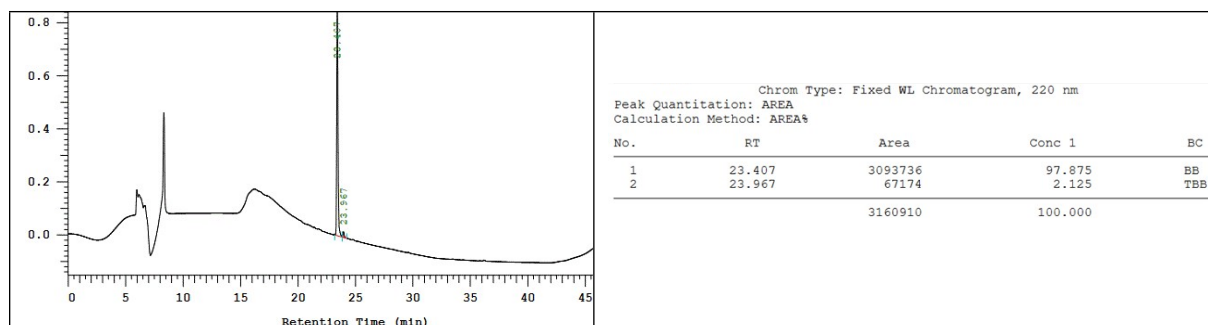

Figure S6 HPLC chromatogram of purified **III-3(a<sub>2</sub>)**.

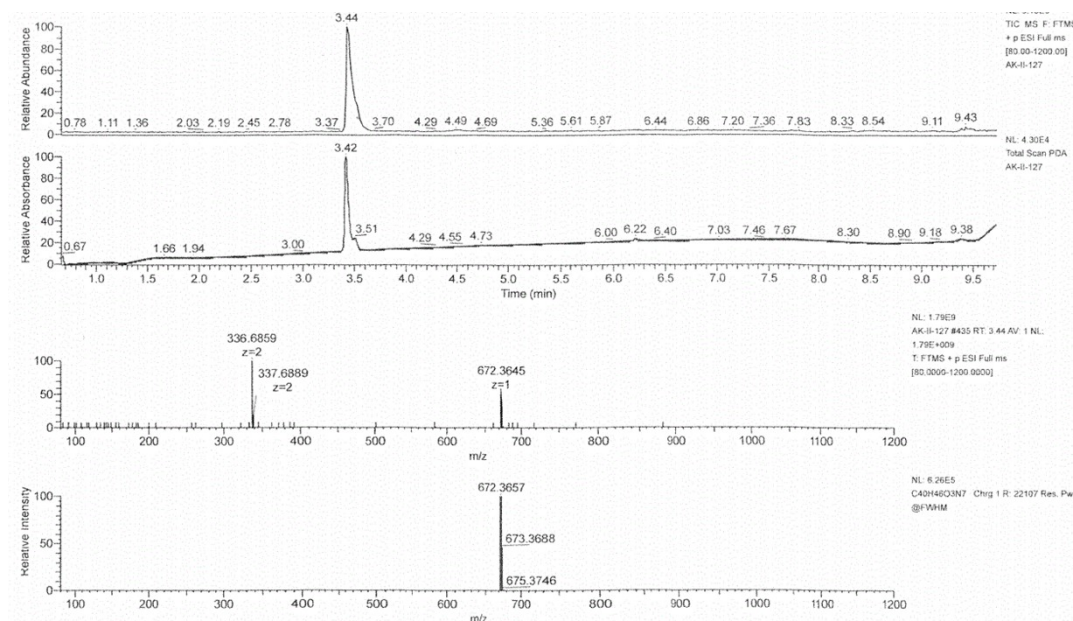

Figure S7 LCMS spectra of **III-3(a<sub>2</sub>)**.



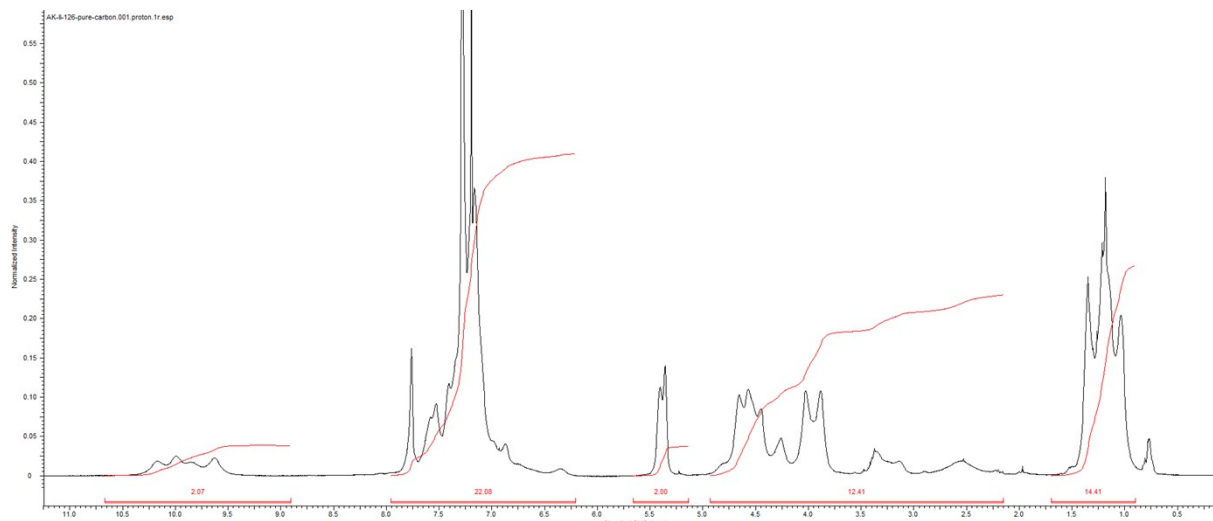

Figure S8  $^1\text{H-NMR}$  spectra in  $\text{CDCl}_3$  of **III-3(a<sub>2</sub>)**.

### 3.3- meta-arylopeptoid trimer, III-3(b<sub>2</sub>).

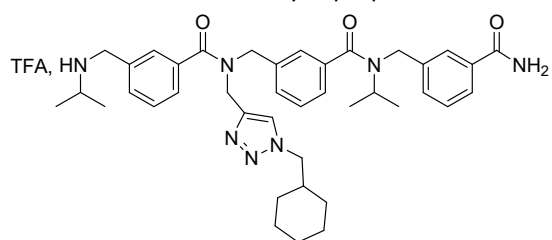

Trimer **III-3(b<sub>2</sub>)** was synthesised according general procedure A then general procedure B using 100 mg of RA resin (0.054 mmol).

$m_{\text{crude}}$  = 46.2 mg (purity 83%), crude yield 112%

$m_{\text{pure}}$  = 30 mg (purity 85%), isolated yield 85%

HRMS (TOF MS ES<sup>+</sup>):  $m/z$  calcd for C<sub>40</sub>H<sub>52</sub>N<sub>7</sub>O<sub>3</sub> [M+H]<sup>+</sup>: 678.41261; found: 678.4128 (0.24 ppm).

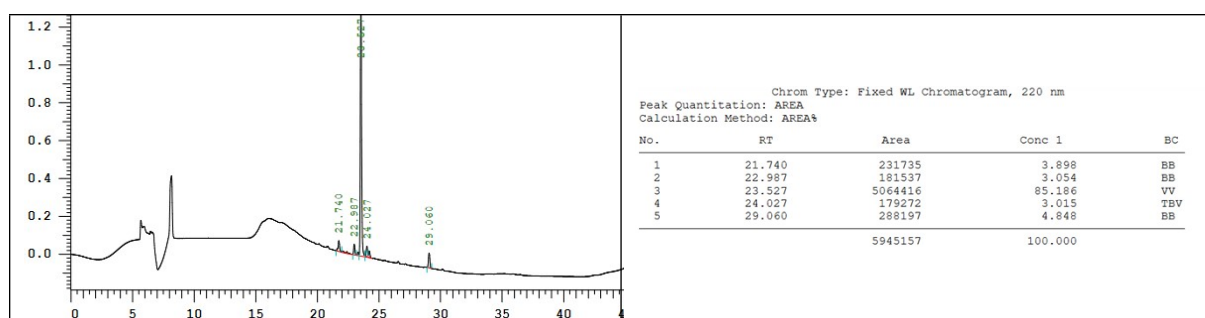

Figure S9 HPLC chromatogram of purified **III-3(b<sub>2</sub>)**

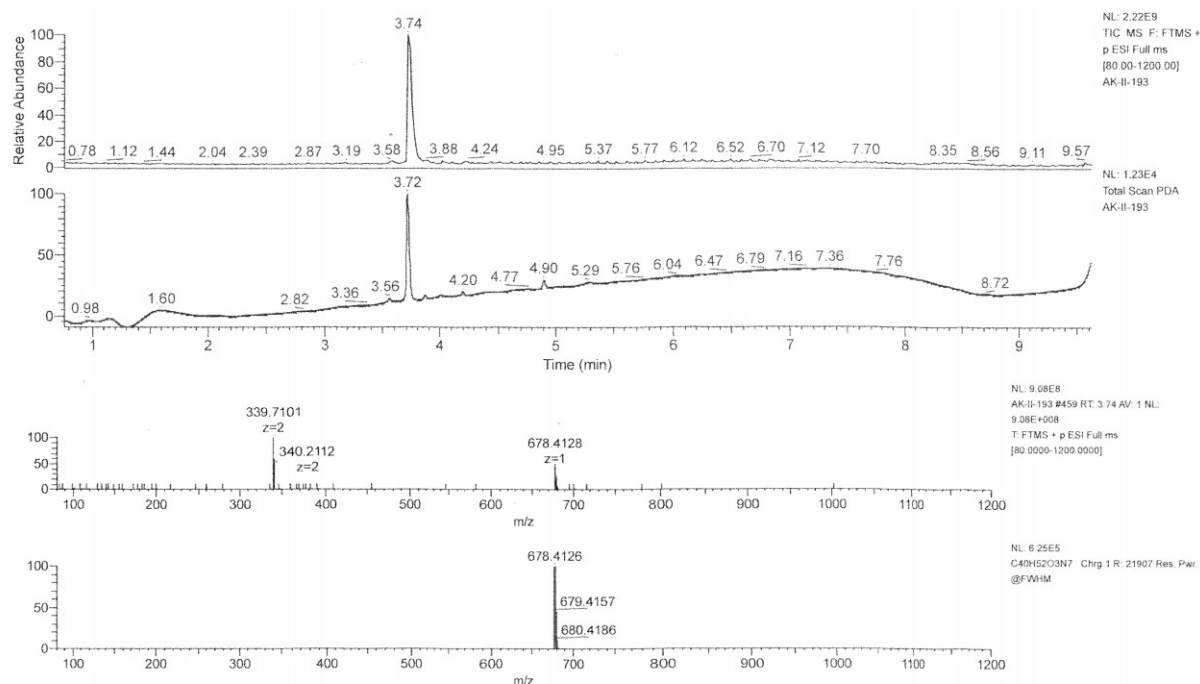

Figure S10 LCMS spectra of **III-3(b<sub>2</sub>)**

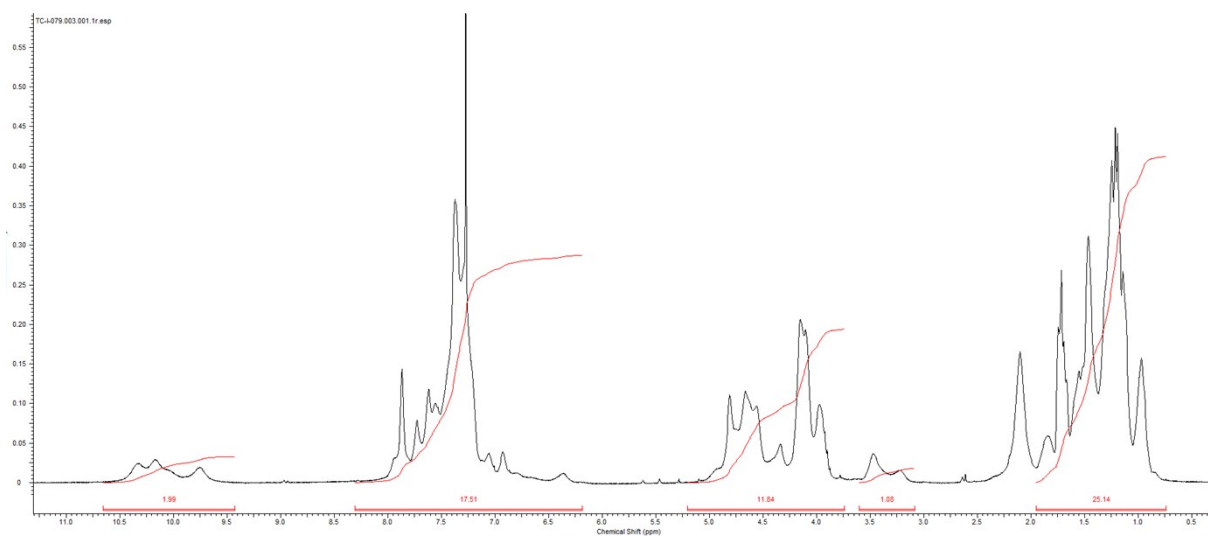

Figure S11  $^1\text{H-NMR}$  spectra in  $\text{CDCl}_3$  of **III-3(b<sub>2</sub>)**.

### 3.4-meta-arylopeptoid trimer III-3(c<sub>2</sub>).

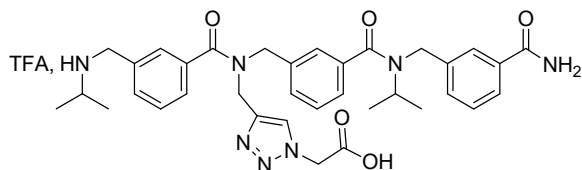

Trimer **III-3(c<sub>2</sub>)** was synthesised according to general procedure A then general procedure B using 50 mg of RA resin (0.027mmol). After cleavage from the resin, the acid group was deprotected by treatment in 3ml TFA/CH<sub>2</sub>Cl<sub>2</sub> (2/8) solution at room temperature overnight.

$m_{\text{crude}}$  = 30mg (purity 85%), crude yield 147%

$m_{\text{pure}}$  = 20 mg (purity 96%), isolated yield 97%

HRMS (TOF MS ES+):  $m/z$  calcd for C<sub>35</sub>H<sub>42</sub>N<sub>7</sub>O<sub>5</sub> [M+H]<sup>+</sup>: 640.32419; found: 640.3235 (-1.1 ppm).

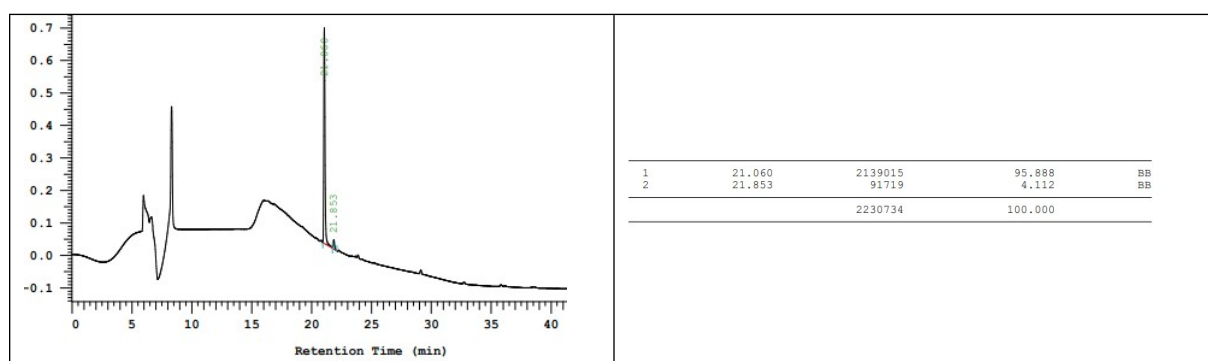

Figure S12 HPLC chromatogram of purified **III-3(c<sub>2</sub>)**

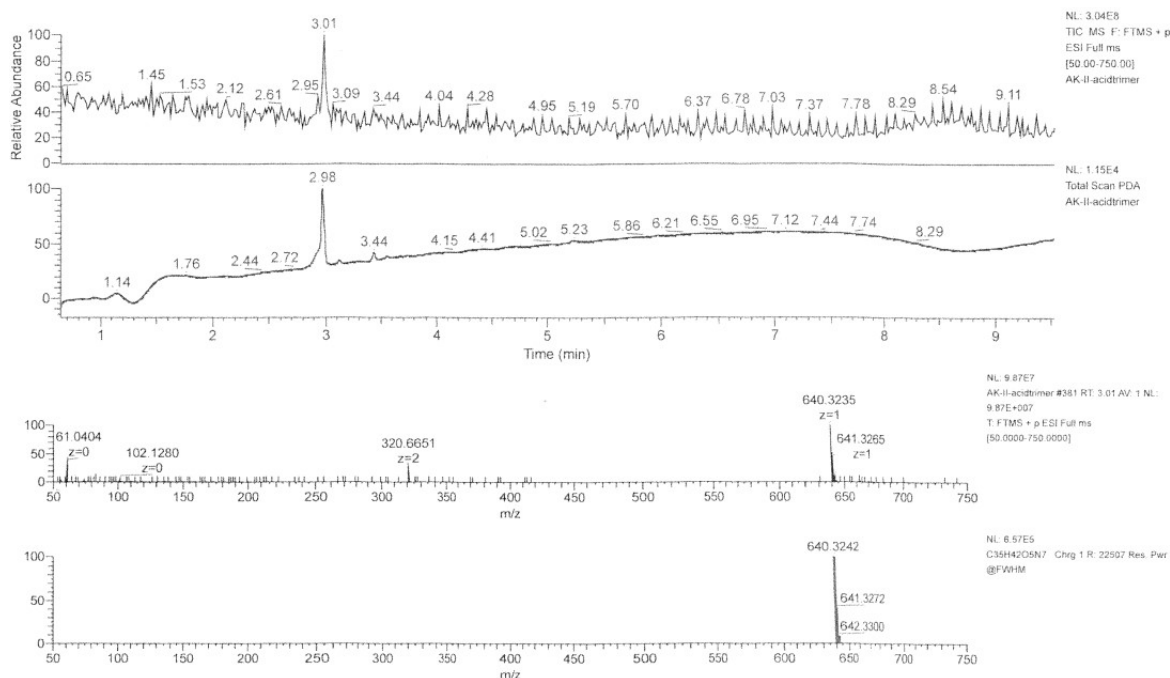

Figure S13 LCMS spectra of **III-3(c<sub>2</sub>)**

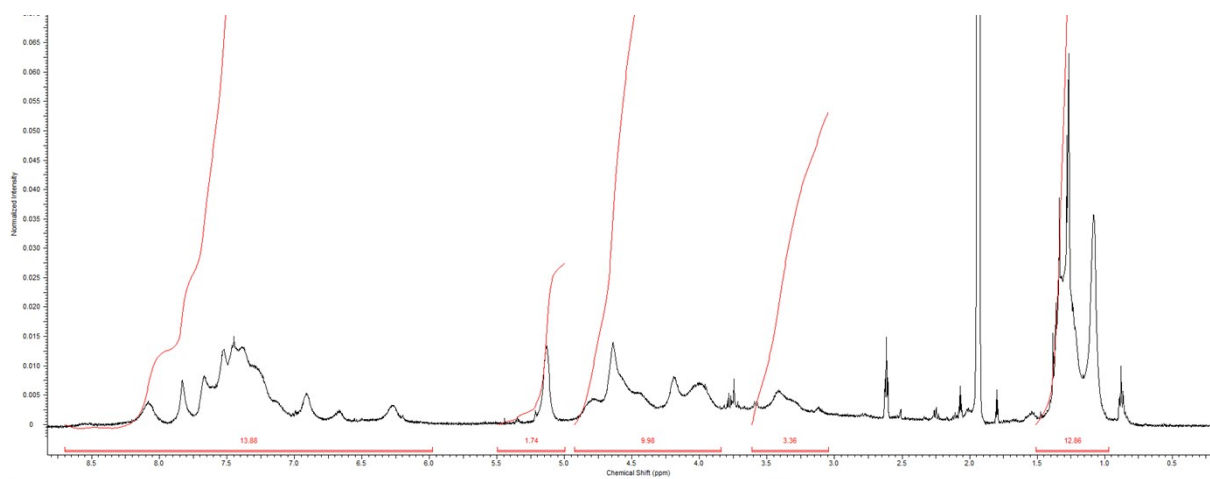

Figure S14  $^1\text{H-NMR}$  spectra in  $\text{CD}_3\text{CN}$  of III-3(c2).

### 3.5- meta-arylopeptoid trimer III-3(d<sub>2</sub>).

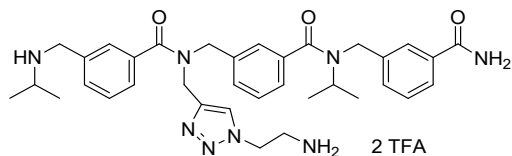

Trimer **III-3(d<sub>2</sub>)** was synthesised according general procedure A then general procedure B using 250 mg of RA resin (0.135mmol).

$m_{\text{crude}}$  = 139 mg (purity 87%), crude yield 120%

$m_{\text{pure}}$  = 98 mg (purity 97%), isolated yield 85%

HRMS (TOF MS ES<sup>+</sup>):  $m/z$  calcd for C<sub>35</sub>H<sub>45</sub>N<sub>8</sub>O<sub>3</sub> [M+H]<sup>+</sup>: 625.36091; found: 625.3611 (0.27 ppm).

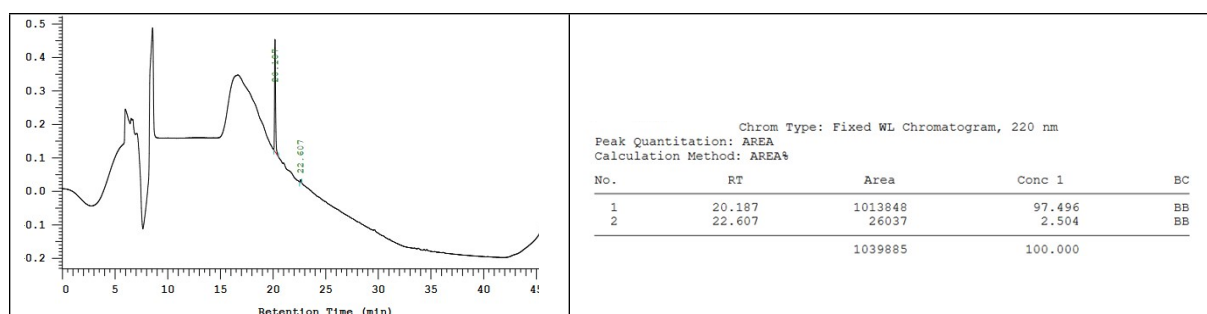

Figure S15 HPLC chromatogram of purified **III-3(d<sub>2</sub>)**.

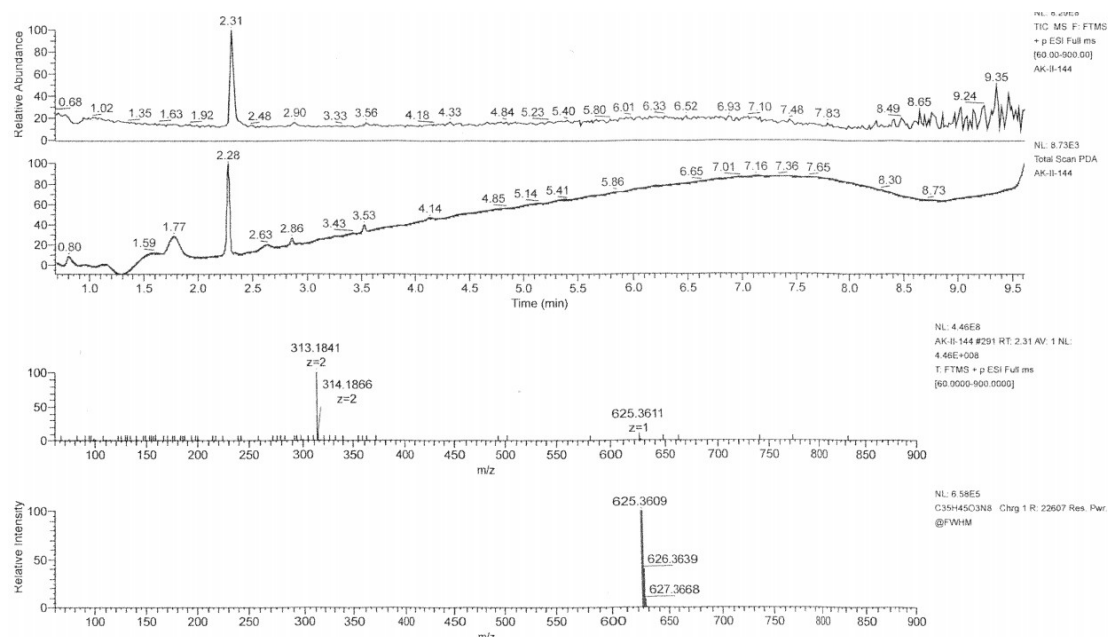

Figure S16 LCMS spectra of **III-3(d<sub>2</sub>)**.

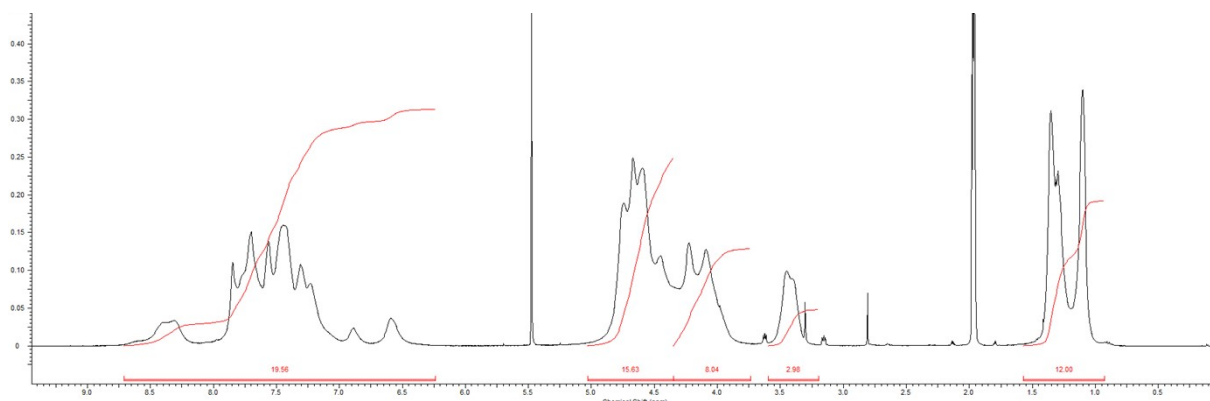

Figure S17  $^1\text{H-NMR}$  spectra in  $\text{CD}_3\text{CN}$  of **III-3(d<sub>2</sub>)**.

### 3.6- meta-arylopeptoid trimer, III-3(e<sub>2</sub>).

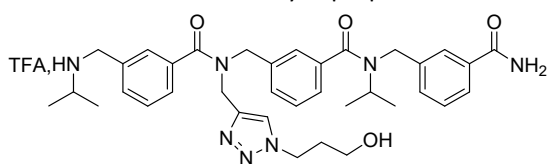

Trimer **III-3(e<sub>2</sub>)** was synthesised according general procedure A then general procedure B using 100 mg of RA resin (0.054 mmol).

$m_{\text{crude}}$  = 42 mg (purity 80%), crude yield 120%

$m_{\text{pure}}$  = 30 mg (purity 99%), isolated yield 90%

HRMS (TOF MS ES+):  $m/z$  calcd for C<sub>36</sub>H<sub>46</sub>N<sub>7</sub>O<sub>4</sub> [M+H]<sup>+</sup>: 640.36058; found: 640.3593 (-1.98 ppm).

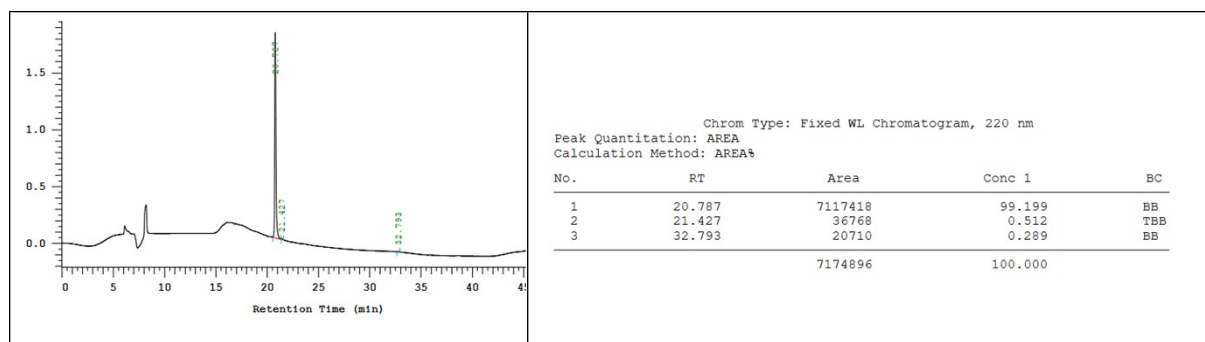

Figure S18 HPLC chromatogram of purified **III-3(e<sub>2</sub>)**.

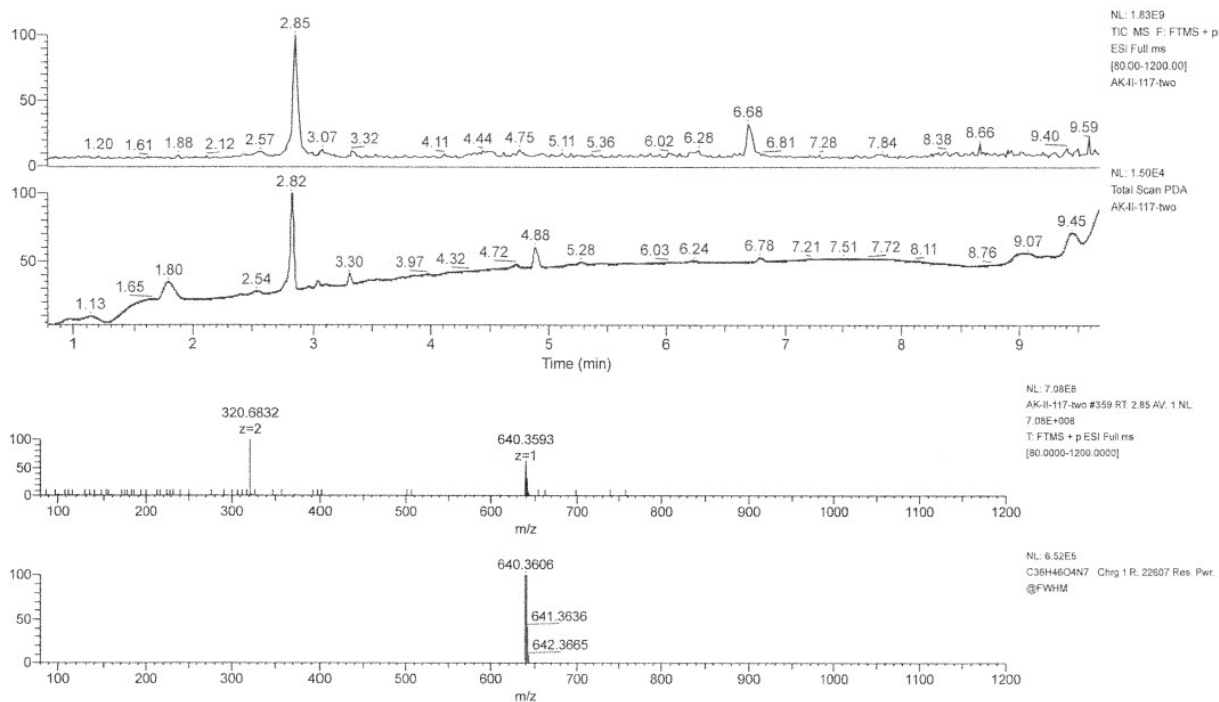

Figure S19 LCMS spectra of **III-3(e<sub>2</sub>)**.



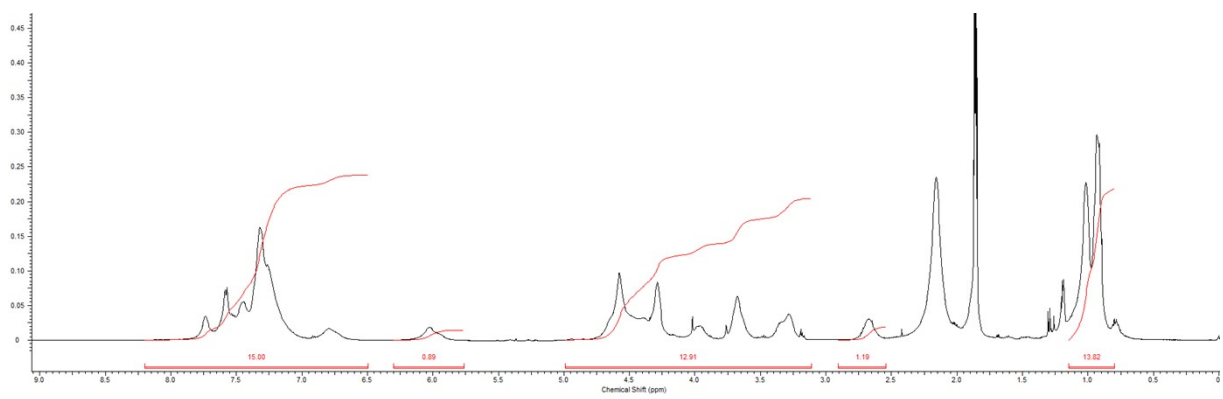

Figure S20  $^1\text{H-NMR}$  spectra in  $\text{CD}_3\text{CN}$  of **III-3(e<sub>2</sub>)**.

## 4- Synthesis and Characterization data of arylopeptoid tetramers.

### 4.1- meta-arylopeptoid tetramer, **II-4-(Alk<sub>2,4</sub>)**.

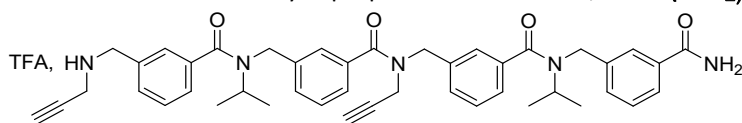

Tetramer **II-4-(Alk<sub>2,4</sub>)** was synthesised according to general procedure A using 100 mg of RA resin (0.054 mmol), then cleavage by gently shaking a solution of TFA/TIS/H<sub>2</sub>O (95:2.5:2.5, 1mL) for 10 min at RT.

$m_{\text{crude}}$  = 50mg (purity 80%), crude yield 112%

$m_{\text{pure}}$  = 32 mg (purity 96%), isolated yield 72%

HRMS (TOF MS ES<sup>+</sup>):  $m/z$  calcd for C<sub>44</sub>H<sub>48</sub>N<sub>5</sub>O<sub>4</sub> [M+H]<sup>+</sup>: 710.37008; found: 710.3702 (0.14 ppm).

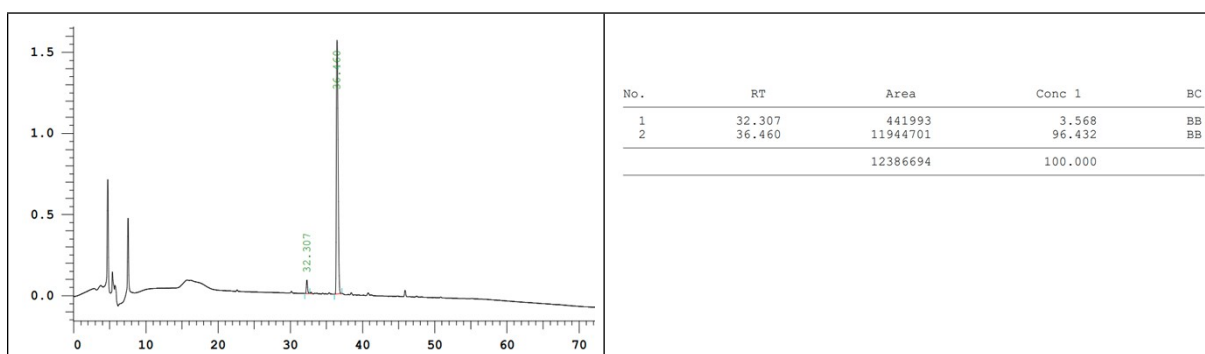

Figure S21 HPLC chromatogram of purified **II-4-(Alk<sub>2,4</sub>)**.

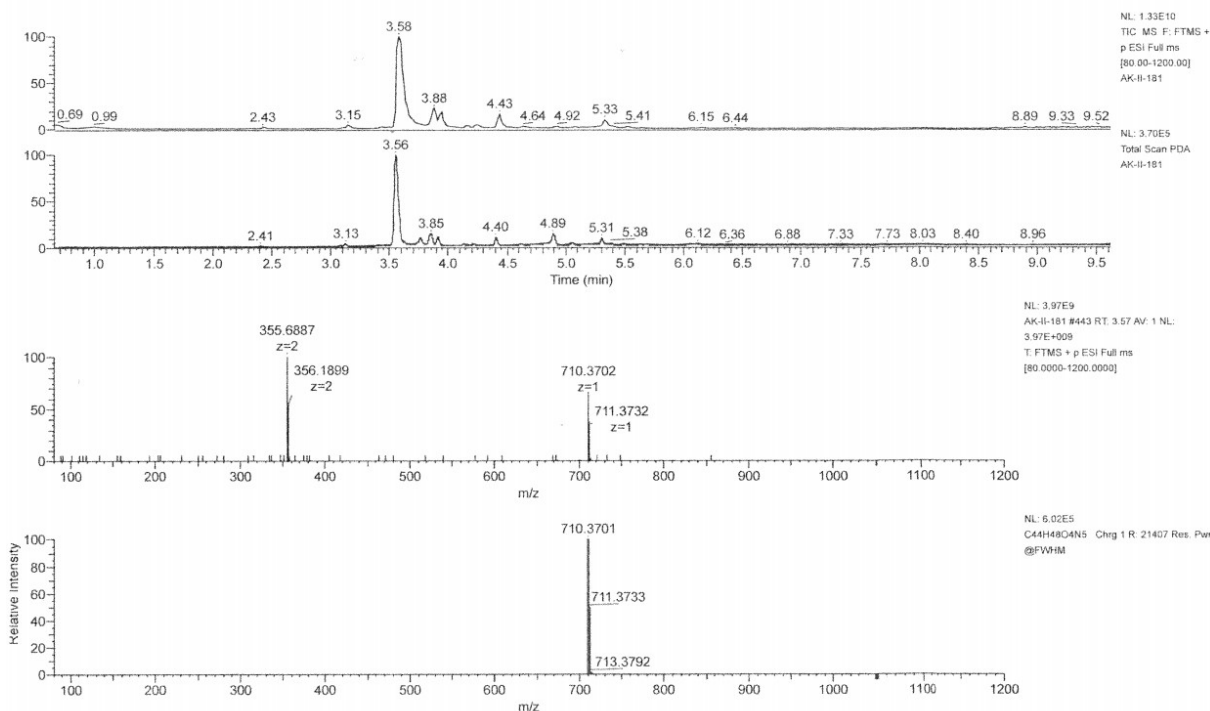

Figure S22 LCMS spectra of **II-4-(Alk<sub>2,4</sub>)**.

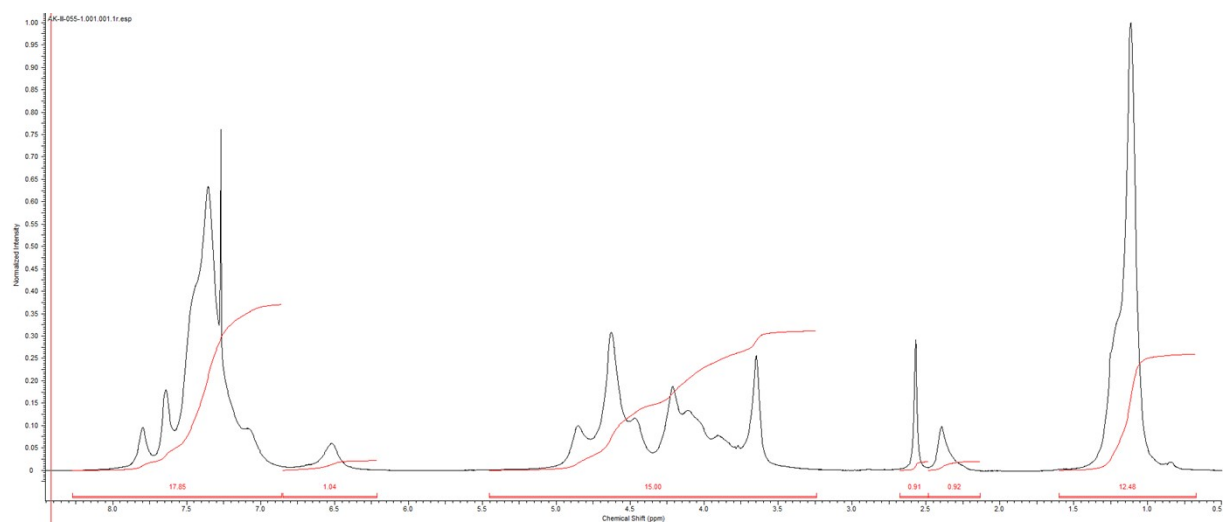

Figure S23 <sup>1</sup>H-NMR spectra in CD<sub>3</sub>Cl<sub>3</sub> of II-4-(Alk<sub>2,4</sub>).

## 4.2- Homo clicked arylopeptoids

### 4.2.1- meta-arylopeptoid tetramer, III-4(a<sub>2,4</sub>).

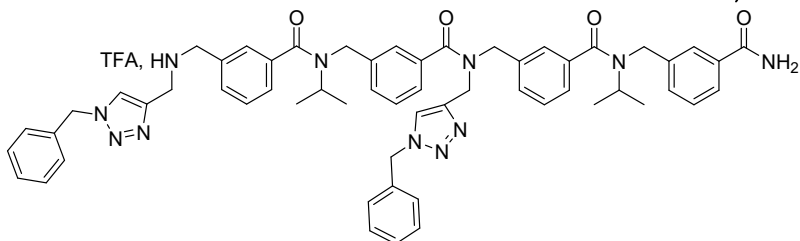

Tetramer III-4(a<sub>2,4</sub>) was synthesised according general procedure A then general procedure B using 100 mg of RA resin (0.054 mmol)

m<sub>crude</sub> = 68 mg (purity 82%), crude yield 115%

m<sub>pure</sub> = 44 mg (purity 87%), isolated yield 85%

HRMS (TOF MS ES+): *m/z* calcd for C<sub>58</sub>H<sub>62</sub>N<sub>11</sub>O<sub>4</sub> [M+H]<sup>+</sup>: 976.49808; found: 976.4974 (-0.72 ppm).

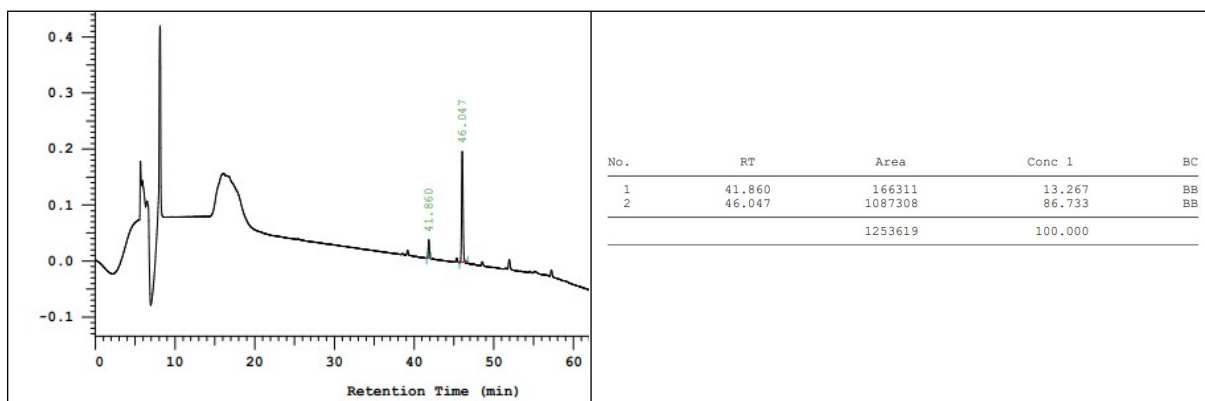

Figure S24 HPLC chromatogram of purified III-4(a<sub>2,4</sub>).

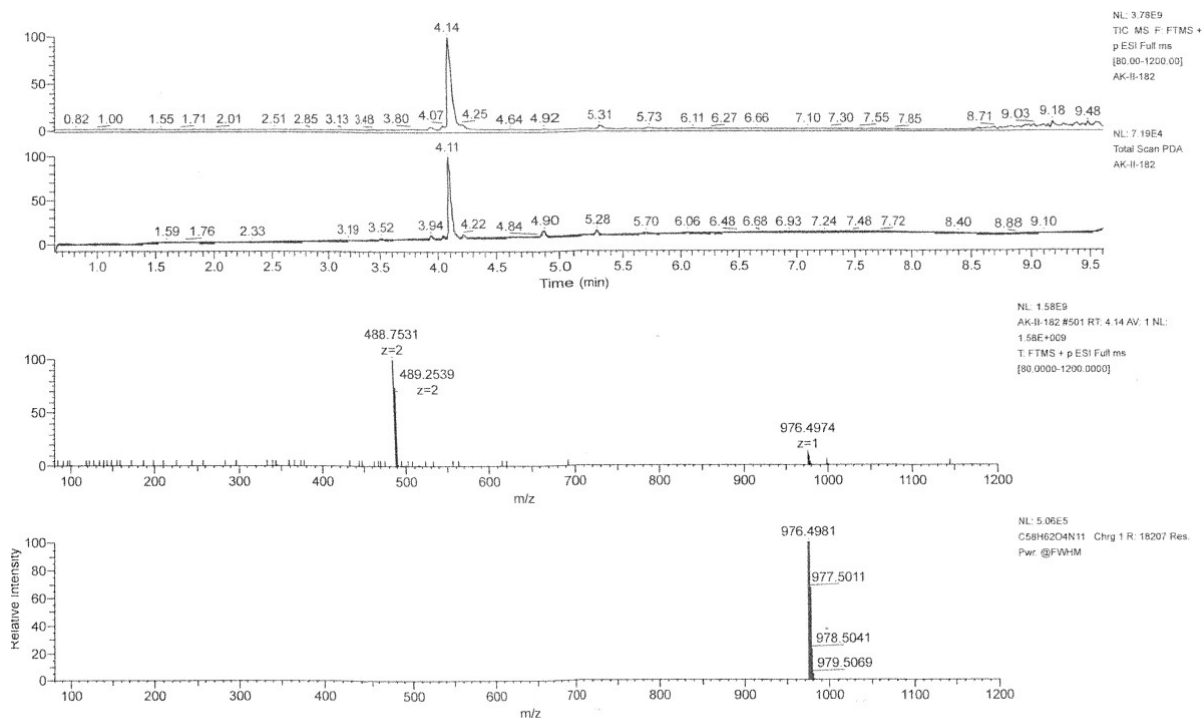

### 4.2.2- meta-arylopeptoid tetramer, III-4(b<sub>2,4</sub>)

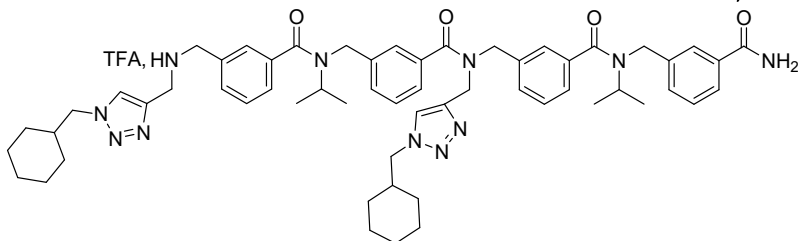

Tetramer III-4(b<sub>2,4</sub>) was synthesised according general procedure A then general procedure B using 100 mg of RA resin (0.054 mmol)

m<sub>crude</sub> = 73 mg (purity 85%), crude yield 124%

m<sub>pure</sub> = 40 mg (purity 95%), isolated yield 75%

HRMS (TOF MS ES<sup>+</sup>): m/z calcd for C<sub>58</sub>H<sub>74</sub>N<sub>11</sub>O<sub>4</sub> [M+H]<sup>+</sup>: 988.59198; found: 988.5907 (-1.29 ppm).

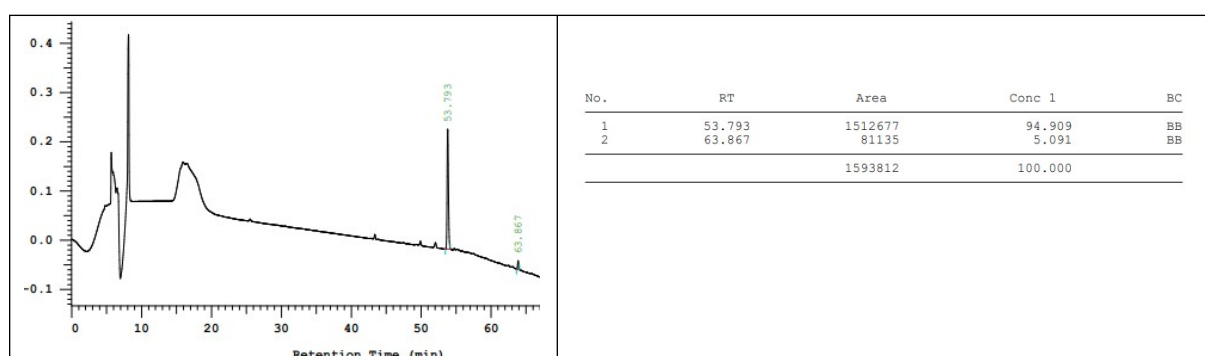

Figure S26 HPLC chromatogram of purified III-4(b<sub>2,4</sub>).

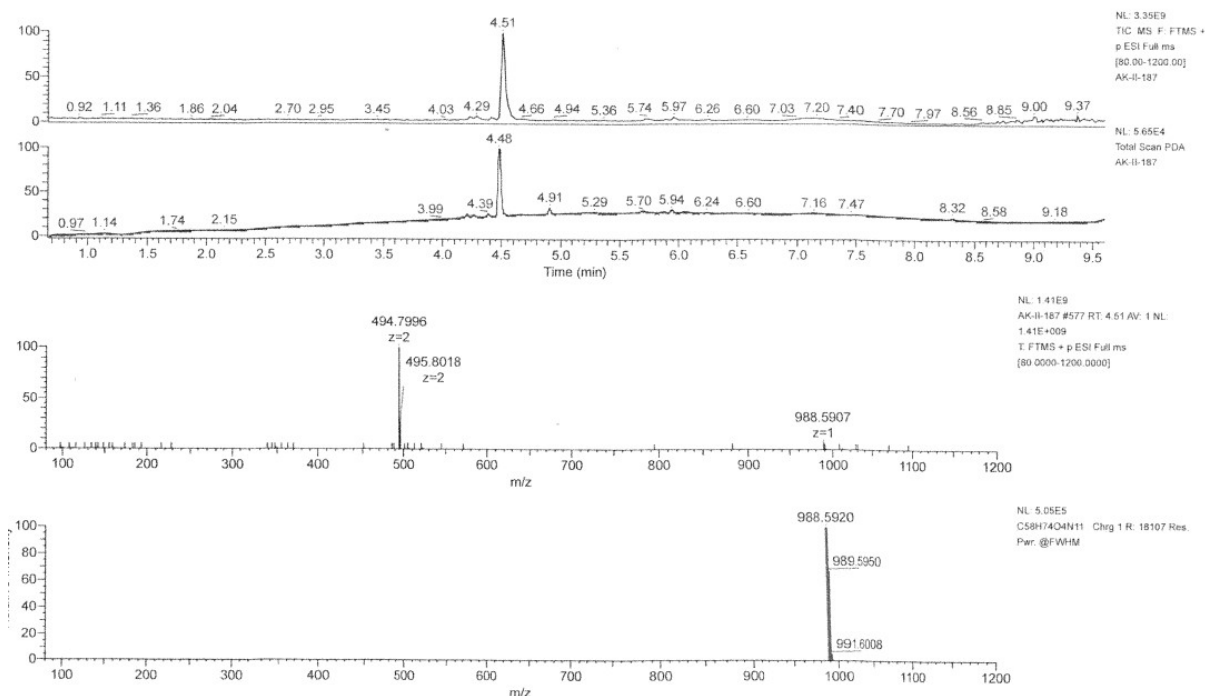

Figure S27 LCMS spectra of III-4(b<sub>2,4</sub>).

4.2.3- meta-arylopeptoid tetramer, III-4(c<sub>2,4</sub>).

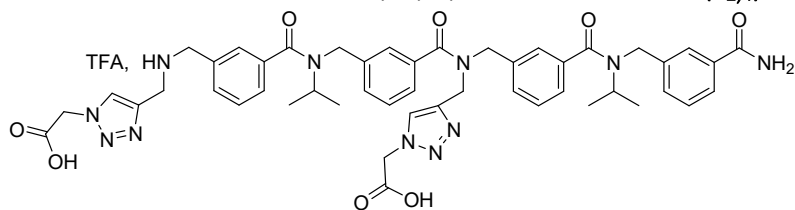

Tetramer III-4(c<sub>2,4</sub>) was synthesised according general procedure A then general procedure B using 100 mg of RA resin (0.054 mmol).

m<sub>crude</sub> = 73mg (purity 78%), 131% crude yield

m<sub>pure</sub> = 44mg (purity 81%), 85% isolated yield

HRMS (TOF MS ES+): *m/z* calcd for C<sub>48</sub>H<sub>55</sub>N<sub>11</sub>O<sub>8</sub> [M+2H]<sup>2+</sup>: 456.71121; found: 456.7113 (0.22 ppm).

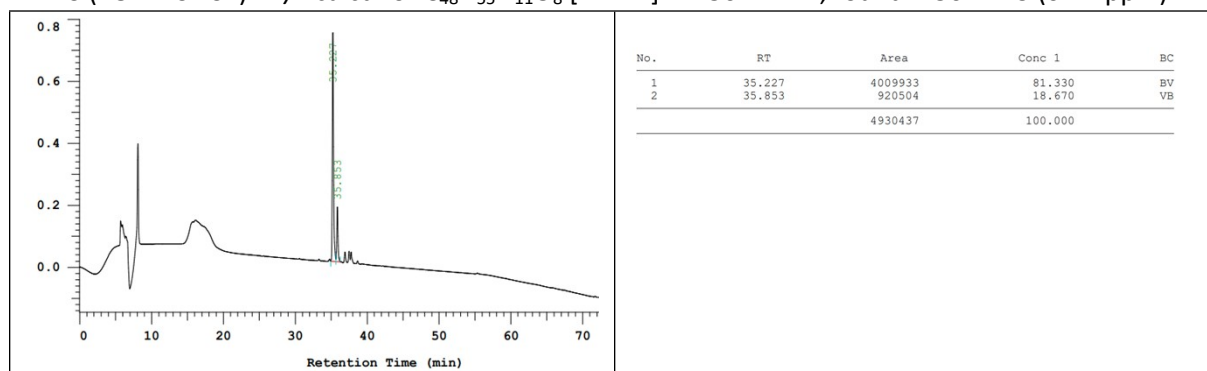

Figure S28 HPLC chromatogram of purified III-4(c<sub>2,4</sub>).

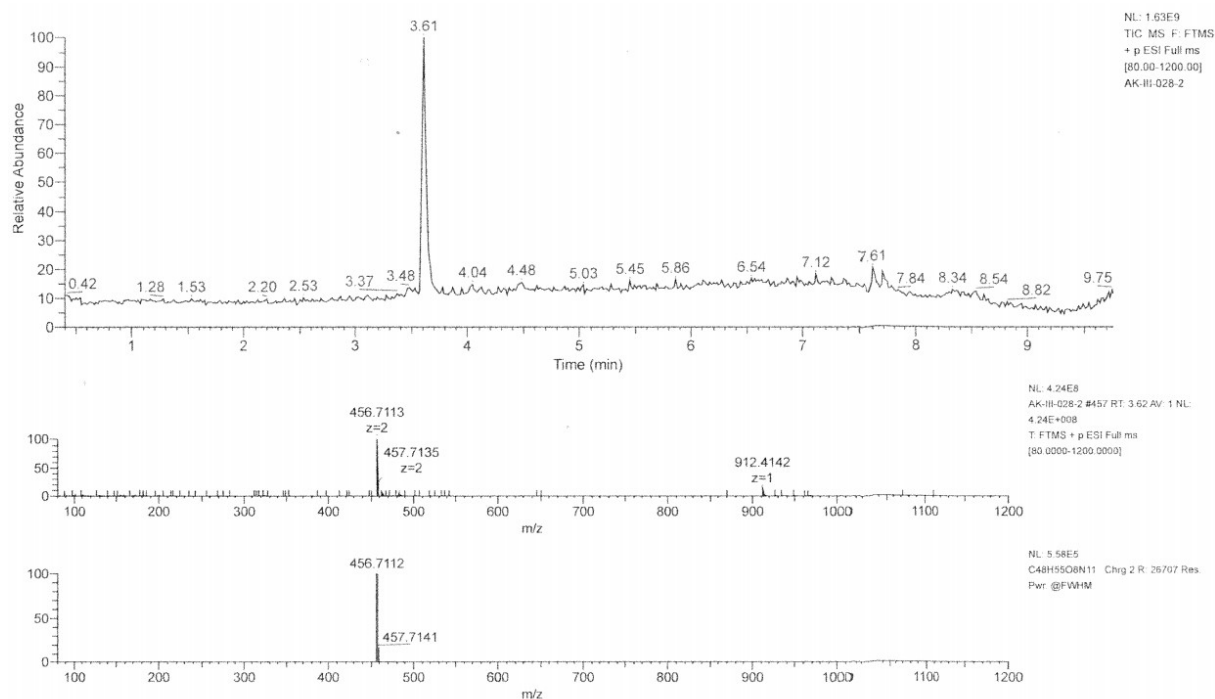

Figure S29 LCMS spectra of III-4(c<sub>2,4</sub>).

#### 4.2.4- meta-arylopeptoid tetramer, III-4(d<sub>2,4</sub>).

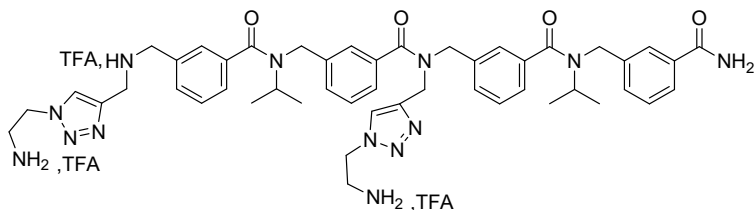

Tetramer III-4(d<sub>2,4</sub>) was synthesised according general procedure A then general procedure B using 100 mg of RA resin (0.054 mmol)

$m_{\text{crude}} = 73\text{mg}$  (purity 80%), crude yield 110%

$m_{\text{pure}} = 36\text{mg}$  (purity 95%), isolated yield 77%

HRMS (TOF MS ES<sup>+</sup>):  $m/z$  calcd for C<sub>48</sub>H<sub>62</sub>N<sub>13</sub>O<sub>4</sub> [M+3H]<sup>3+</sup>: 294.83438; found: 294.8345 (0.33 ppm).

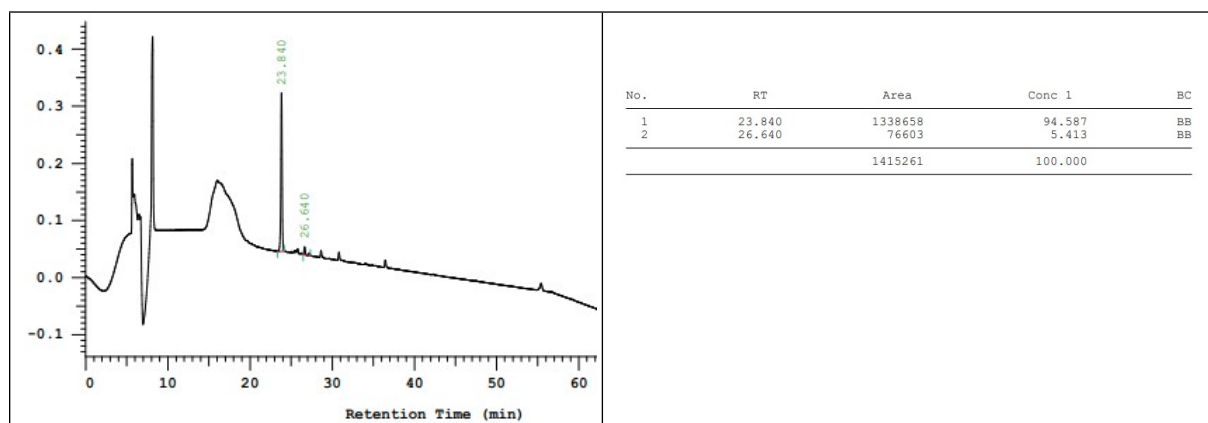

Figure S30 HPLC chromatogram of purified III-4(d<sub>2,4</sub>).

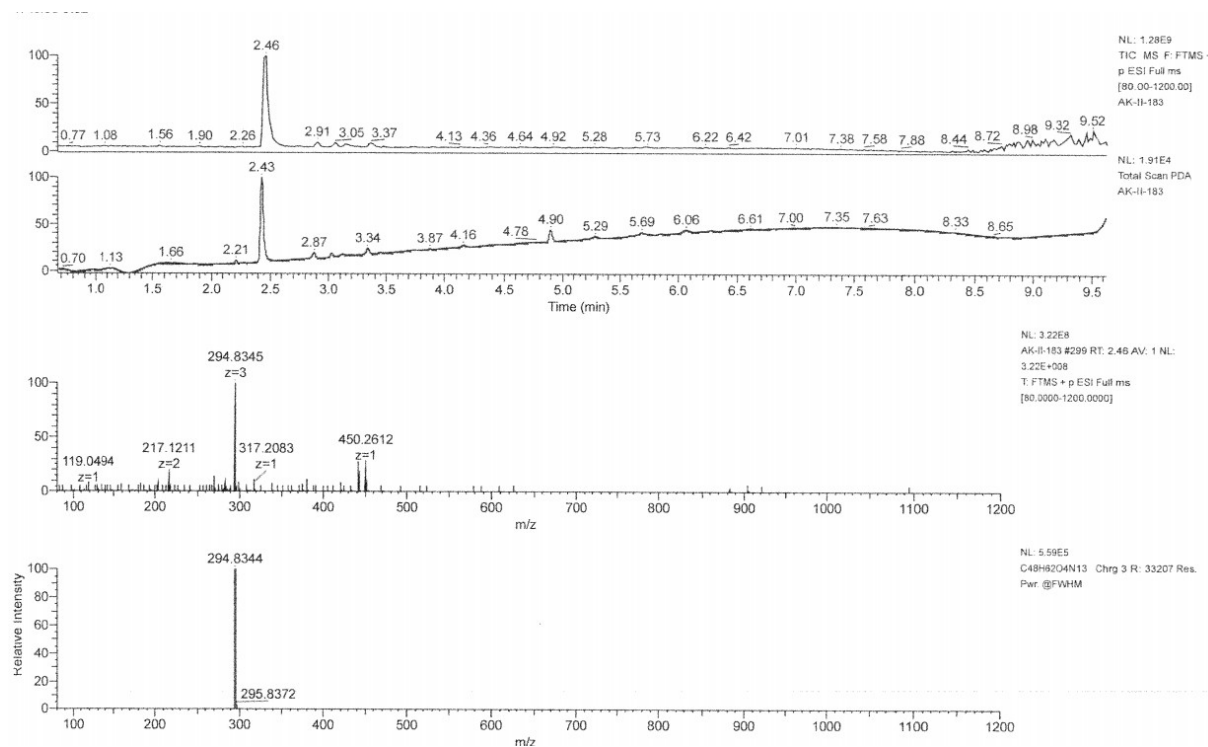

Figure S31 LCMS spectra of III-4(d<sub>2,4</sub>).

4.2.5- meta-arylopeptoid tetramer, III-4(e<sub>2,4</sub>).

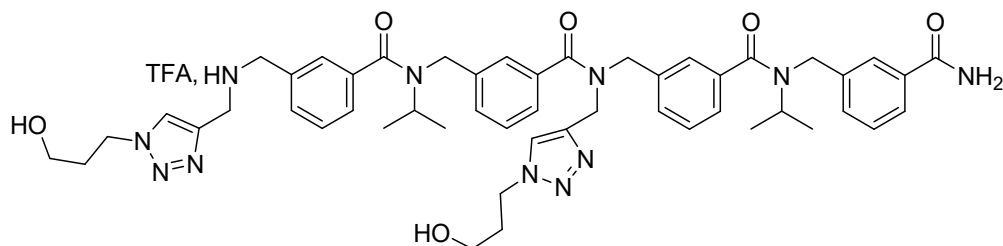

Tetramer III-4(e<sub>2,4</sub>) was synthesised according general procedure A then general procedure B using 125 mg of RA resin (0.0775 mmol)

m<sub>crude</sub> = 101 mg (purity 85%), crude yield 148%

m<sub>pure</sub> = 70 mg (purity 97 %), isolated yield 98%

HRMS (TOF MS ES+): *m/z* calcd for C<sub>50</sub>H<sub>62</sub>N<sub>11</sub>O<sub>6</sub> [M+H]<sup>+</sup>: 912.48791; found: 912.4866 (-1.46 ppm).

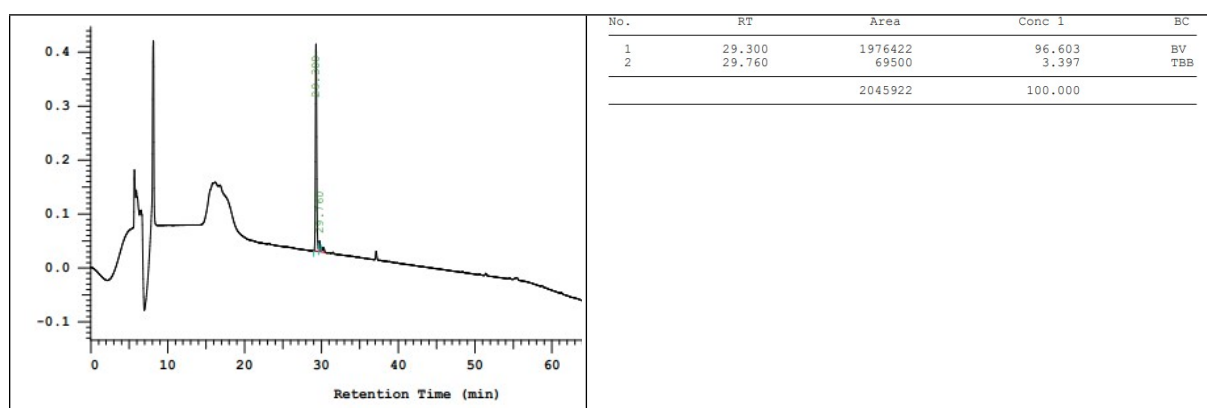

Figure S32 HPLC chromatogram of purified III-4(e<sub>2,4</sub>)

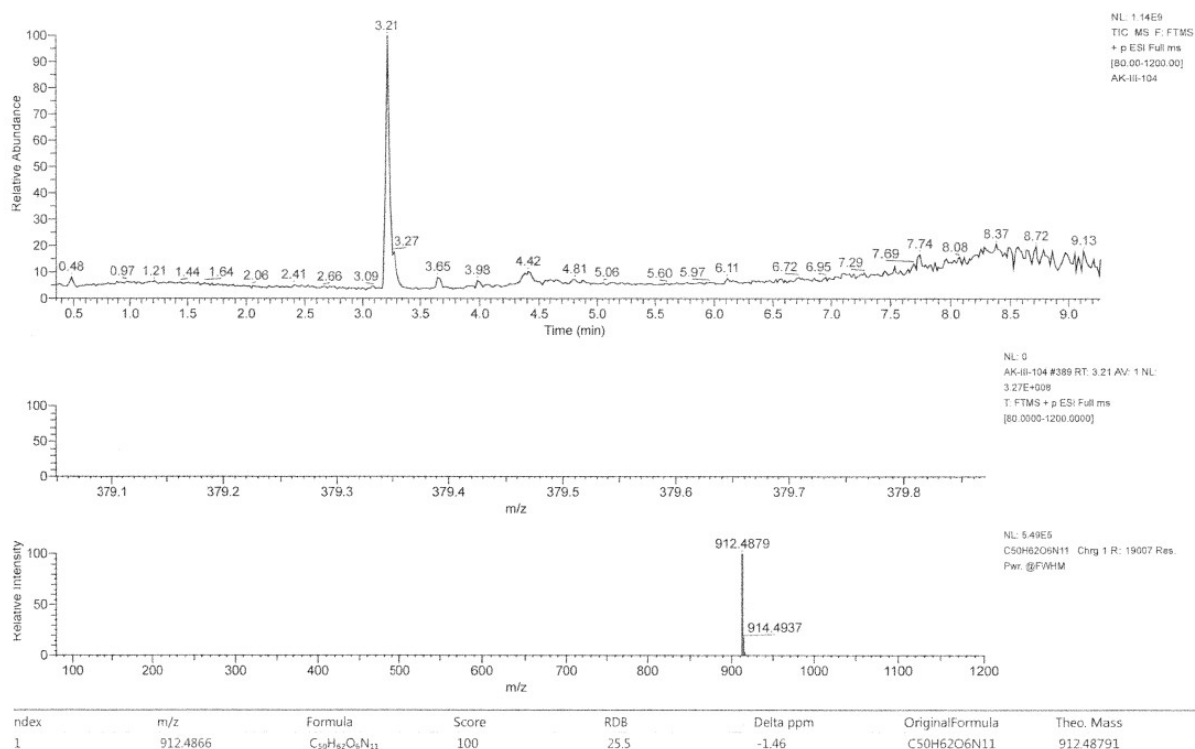

Figure S33 LCMS spectra of III-4(e<sub>2,4</sub>)



### 4.3- Combinatorial on arylopeptoid tetramers

#### 4.3.4- meta-arylopeptoid tetramer, III-4(a,b)(2,4).

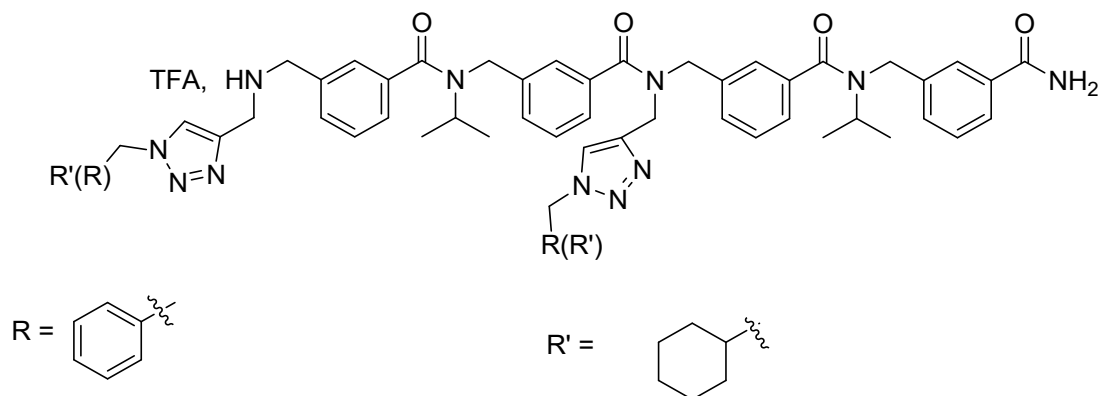

Tetramer III-4(a,b)(2,4) was synthesised according general procedure A then general procedure B using 100 mg of RA resin (0.054 mmol)

$m_{\text{crude}} = 74$  mg (purity 81%), crude yield 121%

$m_{\text{pure}} = 50$  mg (purity 97 %), isolated yield 82%

LCMS pic at 4.16 min: HRMS (TOF MS ES+):  $m/z$  calcd for  $C_{58}H_{62}N_{11}O_4$  [M+H]<sup>+</sup>: 976.49808 found: 976.4979 (-0.15 ppm).

LCMS pic at 4.33 min: HRMS (TOF MS ES+):  $m/z$  calcd for  $C_{58}H_{68}N_{11}O_4$  [M+H]<sup>+</sup>: 982.54503; found: 982.545 (0.02 ppm).

LCMS pic at 4.52 min: HRMS (TOF MS ES+):  $m/z$  calcd for  $C_{58}H_{75}N_{11}O_4$  [M+2H]<sup>2+</sup>: 494.79963; found: 494.8005 (1.84 ppm).

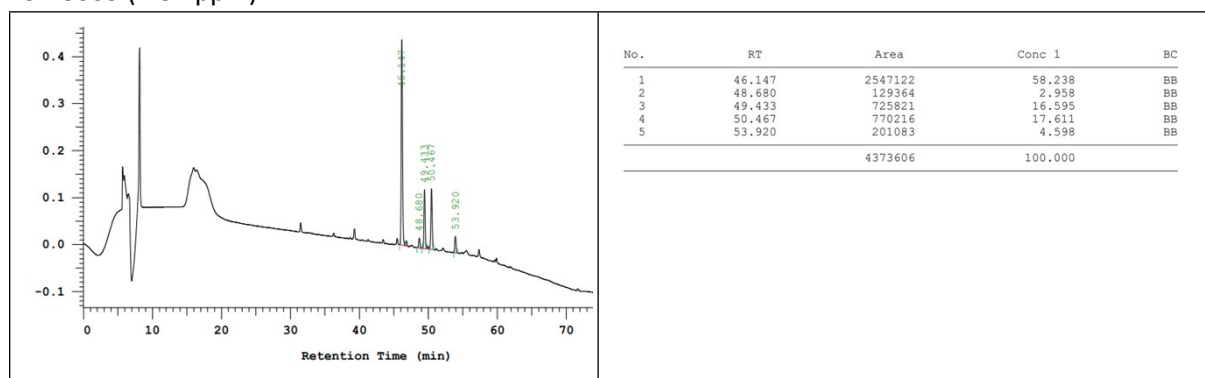

Figure S34 HPLC chromatogram of purified III-4(a,b)(2,4).

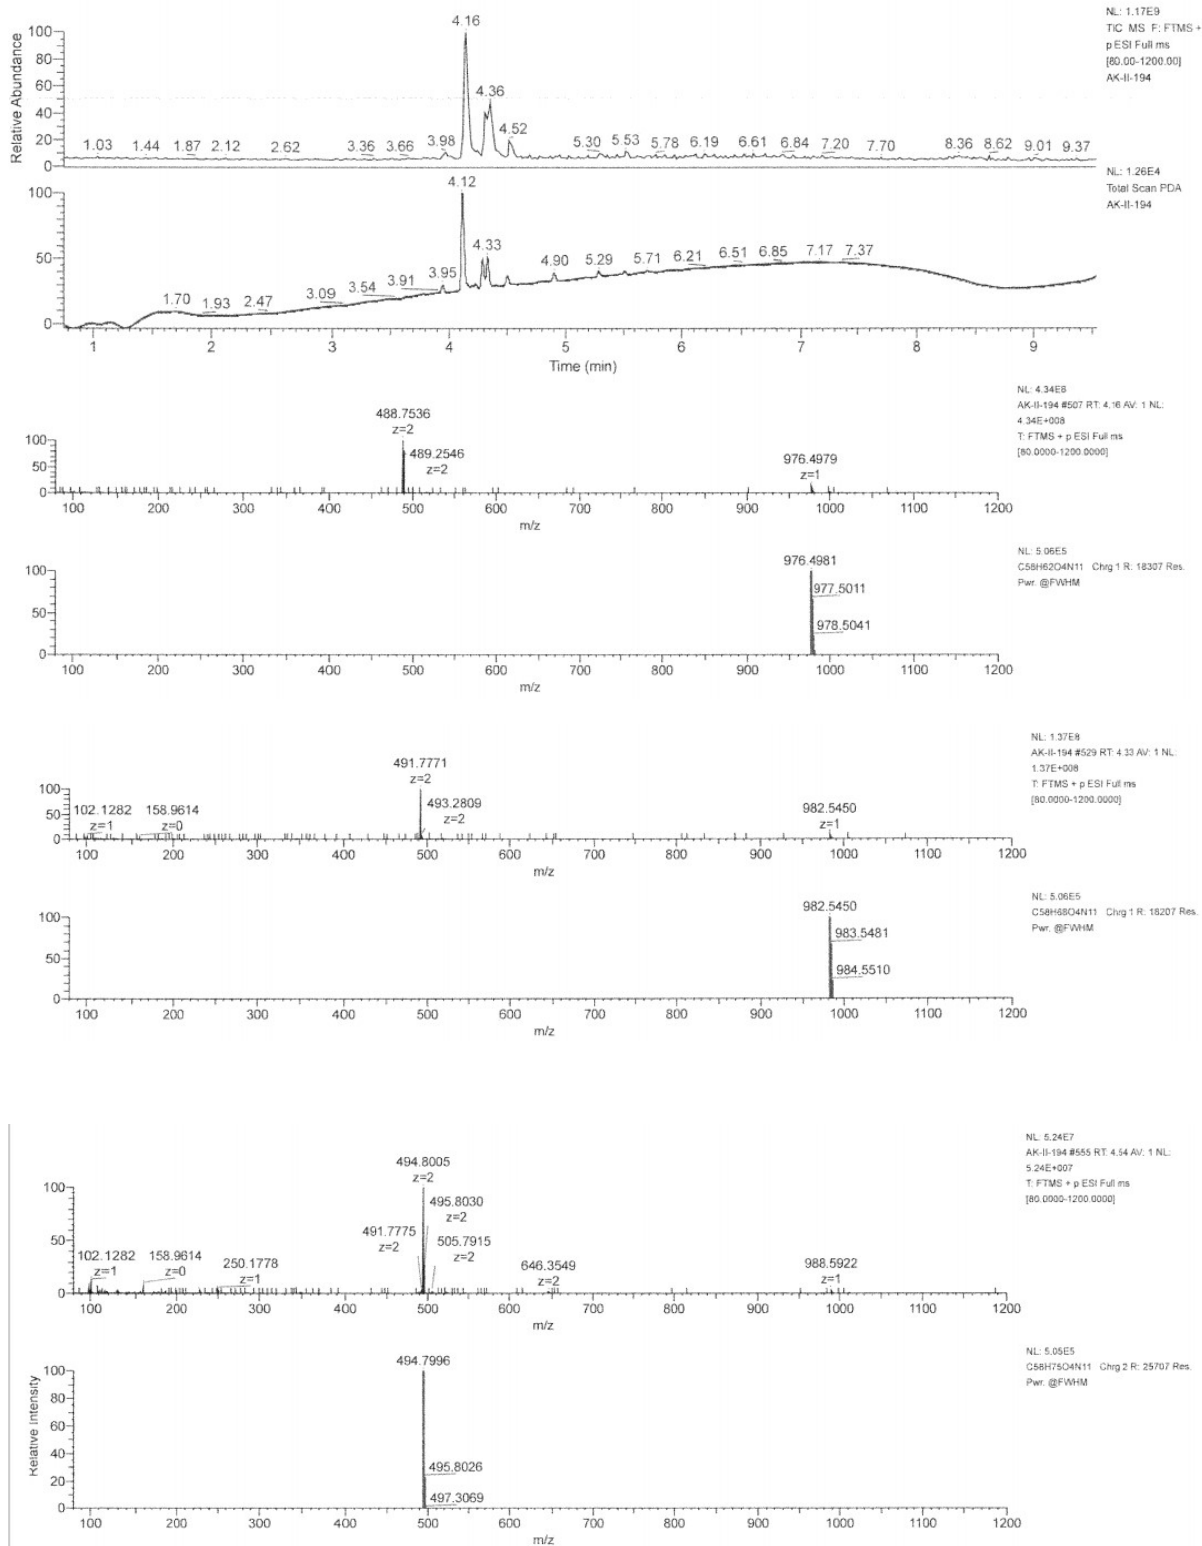

Figure S35 LCMS spectra of III-4(a,b)(2,4).

4.3.2- meta-arylopeptoid tetramer III-4(a,d)(2,4).

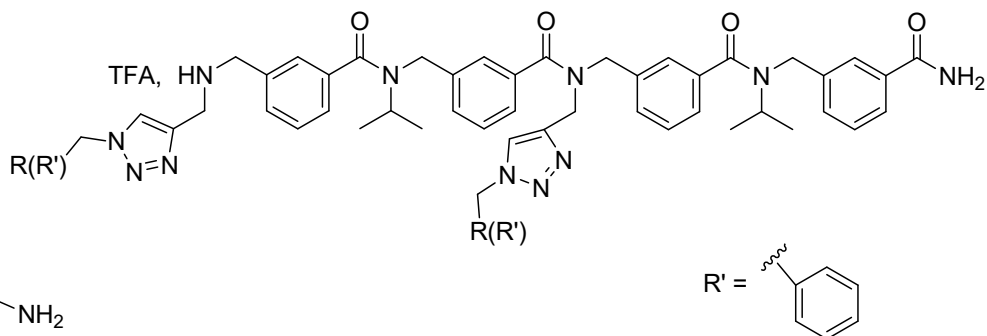

Tetramer III-4(a,d)(2,4) was synthesised according general procedure A then general procedure B using 100 mg of RA resin (0.054 mmol)

$m_{\text{crude}} = 71 \text{ mg}$  (purity 79%), crude yield 116%

$m_{\text{pure}} = 46 \text{ mg}$  (purity 93%), isolated yield 91%

LCMS pic at 4.12 min: HRMS (TOF MS ES+):  $m/z$  calcd for  $\text{C}_{58}\text{H}_{63}\text{N}_{11}\text{O}_4$   $[\text{M}+2\text{H}]^{2+}$ : 488.75268; found: 488.753 (0.58 ppm).

LCMS pic at 3.14 min: HRMS (TOF MS ES+):  $m/z$  calcd for  $\text{C}_{53}\text{H}_{62}\text{N}_{12}\text{O}_4$   $[\text{M}+2\text{H}]^{2+}$ : 465.2503; found: 465.2506 (0.67 ppm).

LCMS pic at 3.27 min: HRMS (TOF MS ES+):  $m/z$  calcd for  $\text{C}_{53}\text{H}_{62}\text{N}_{12}\text{O}_4$   $[\text{M}+2\text{H}]^{2+}$ : 465.2503; found: 465.2505 (0.4 ppm).

LCMS pic at 2.46 min: HRMS (TOF MS ES+):  $m/z$  calcd for  $\text{C}_{48}\text{H}_{61}\text{N}_{13}\text{O}_4$   $[\text{M}+2\text{H}]^{2+}$ : 441.74793 found: 441.748 (0.21 ppm).

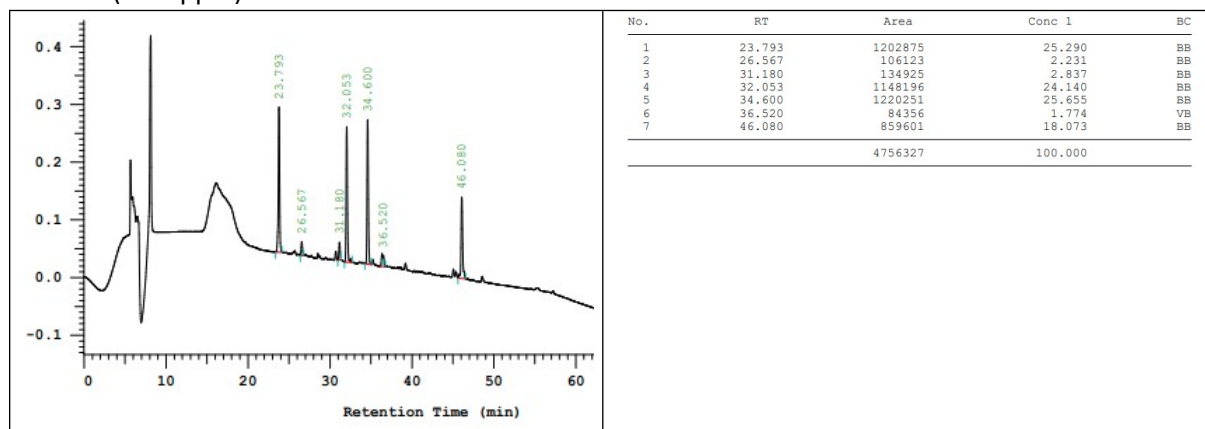

Figure S36 HPLC chromatogram of purified III-4(a,d)(2,4).

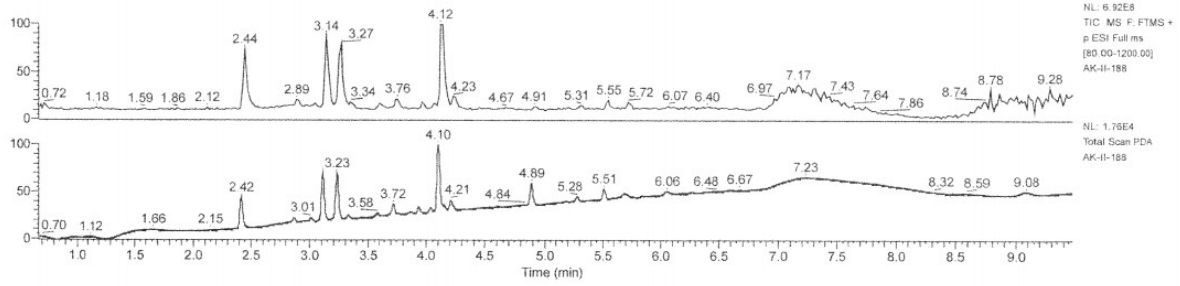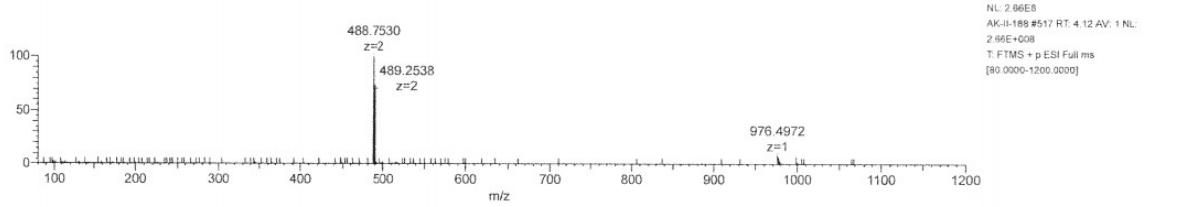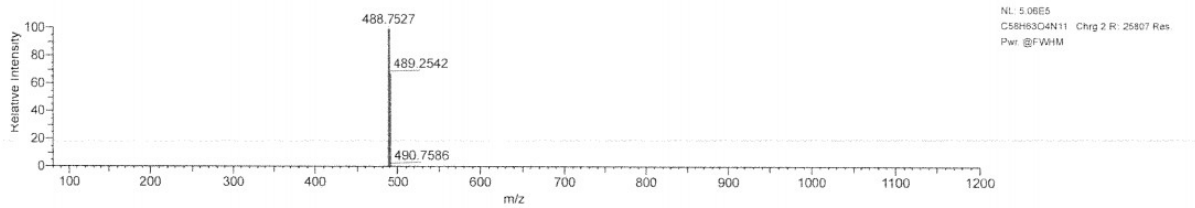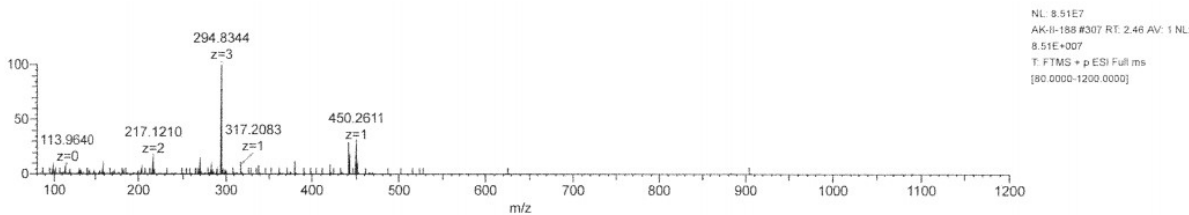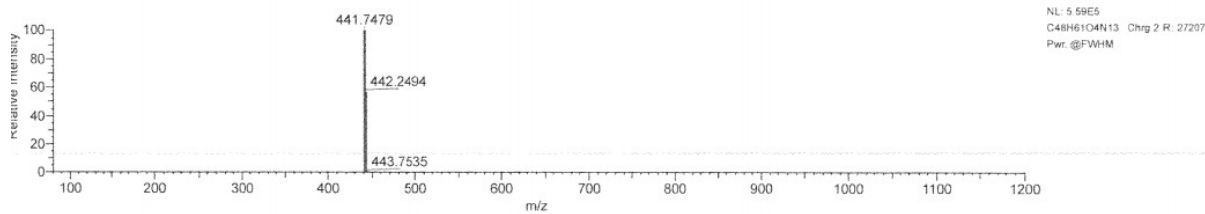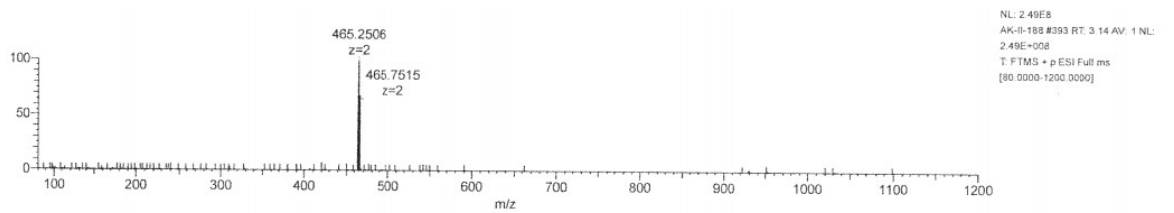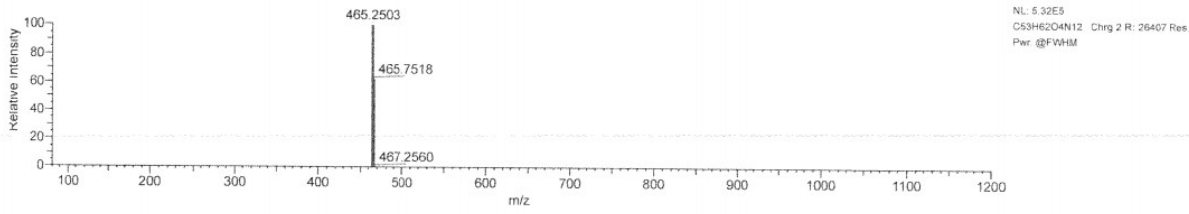

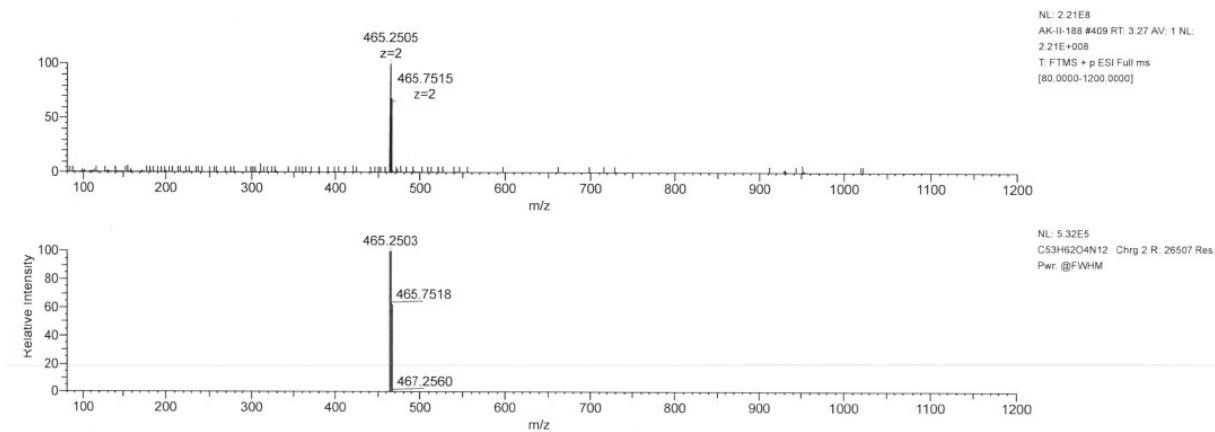

Figure 37 LCMS spectra of III-4(a,d)(2,4)

4.3.3- meta-arylopeptoid tetramer III-4(b,c)(2,4).

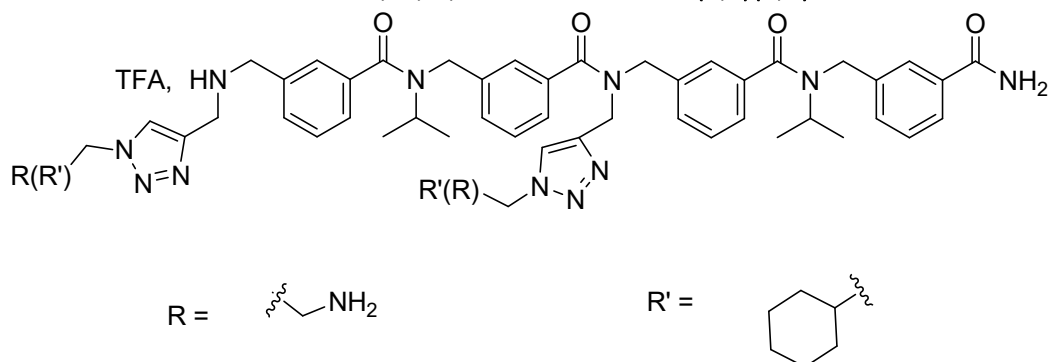

Tetramer III-4(b,c)(2,4) was synthesised according general procedure A then general procedure B using 100 mg of RA resin (0.054 mmol)

$m_{\text{crude}} = 74\text{ mg}$  (purity 81%), crude yield 121%

$m_{\text{pure}} = 46\text{ mg}$  (purity 92%), isolated yield 82%

LCMS pic at 2.45 min: HRMS (TOF MS ES+):  $m/z$  calcd for  $\text{C}_{48}\text{H}_{62}\text{N}_{13}\text{O}_4$   $[\text{M}+3\text{H}]^{3+}$ : 294.83438 found: 294.8346 (0.64 ppm)

LCMS pic at 3.30 min: HRMS (TOF MS ES+):  $m/z$  calcd for  $\text{C}_{53}\text{H}_{68}\text{N}_{12}\text{O}_4$   $[\text{M}+2\text{H}]^{2+}$ : 468.27378; found: 468.274 (0.52 ppm).

LCMS pic at 3.45 min: HRMS (TOF MS ES+):  $m/z$  calcd for  $\text{C}_{53}\text{H}_{68}\text{N}_{12}\text{O}_4$   $[\text{M}+2\text{H}]^{2+}$ : 468.27378; found: 468.274 (0.58 ppm).

LCMS pic at 4.51 min: HRMS (TOF MS ES+):  $m/z$  calcd for  $\text{C}_{58}\text{H}_{75}\text{N}_{11}\text{O}_4$   $[\text{M}+2\text{H}]^{2+}$ : 494.79963; found: 494.7999 (0.48 ppm)

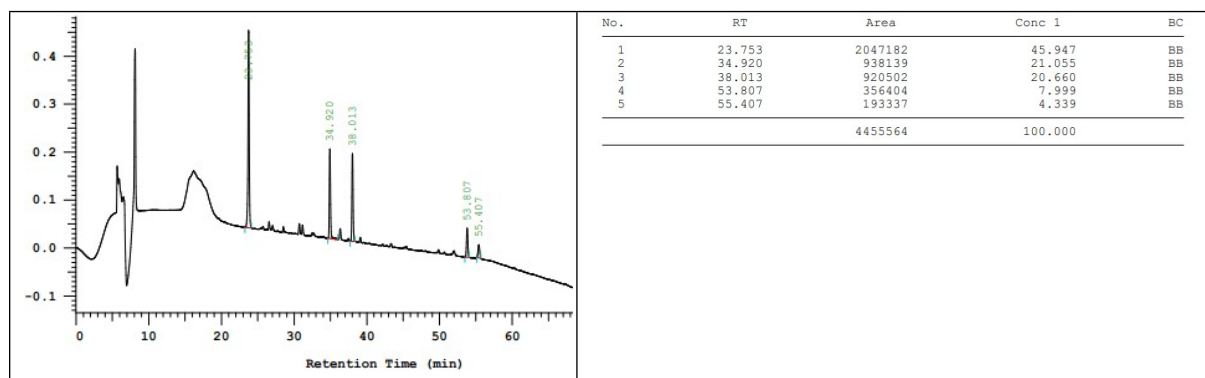

Figure S38 HPLC chromatogram of purified III-4(b,c)(2,4)

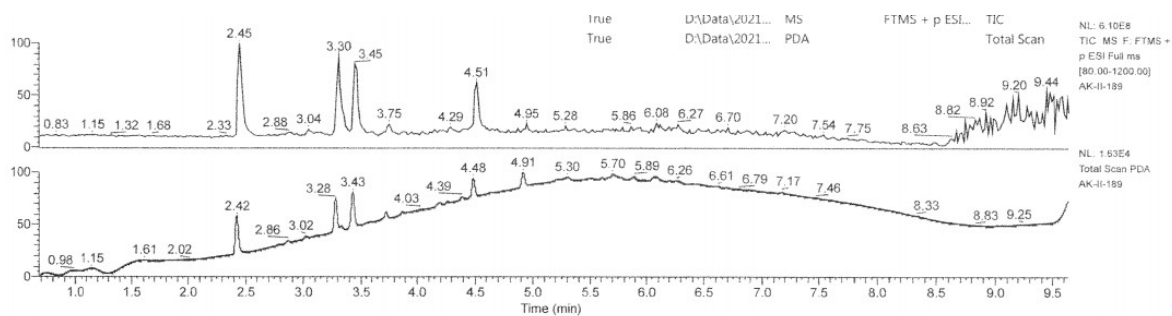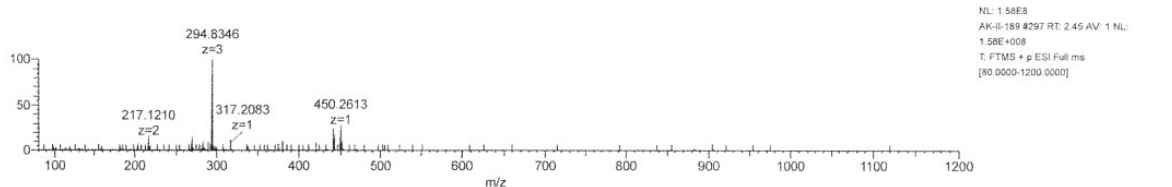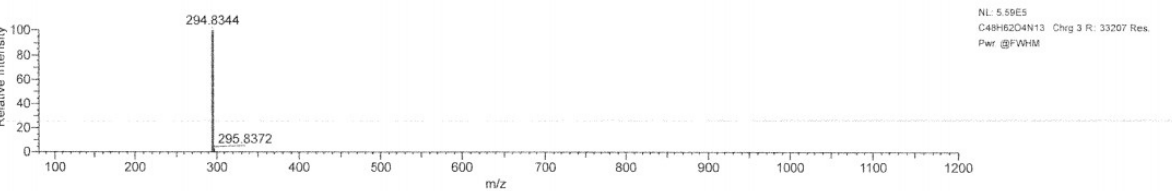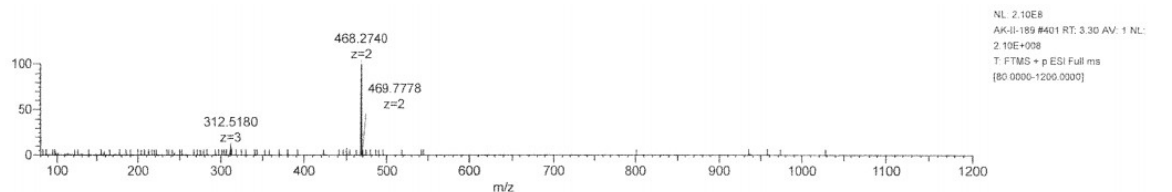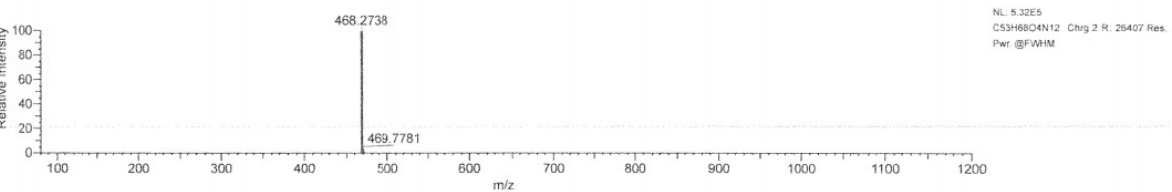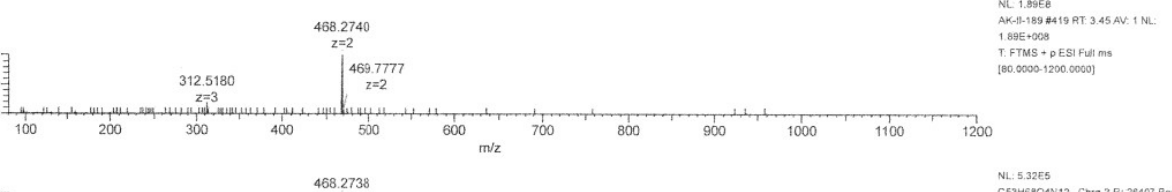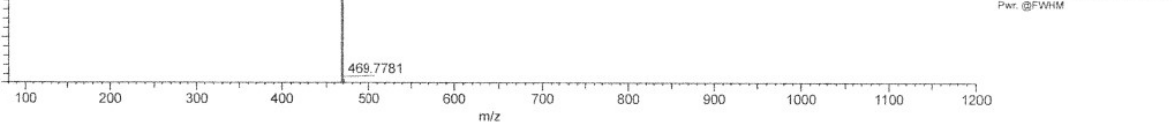

| Index | m/z      | Formula                                                        | Score | RDB | Delta ppm | OriginalFormula                                                | Theo. Mass |
|-------|----------|----------------------------------------------------------------|-------|-----|-----------|----------------------------------------------------------------|------------|
|       | 468.2740 | C <sub>53</sub> H <sub>68</sub> O <sub>4</sub> N <sub>12</sub> | 100   | 26  | 0.58      | C <sub>53</sub> H <sub>68</sub> O <sub>4</sub> N <sub>12</sub> | 468.27378  |

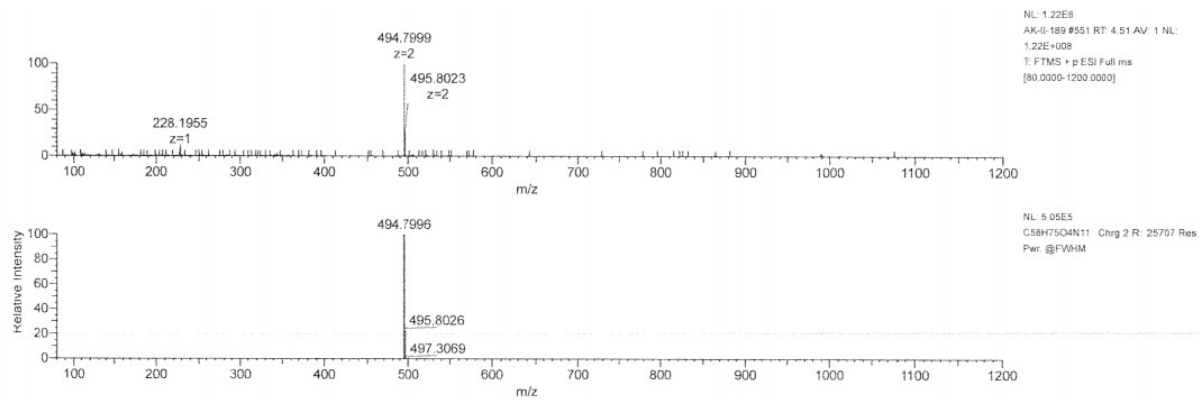

Figure S39 LCMS spectra of III-4(b,c)(2,4).



4.3.1- meta-arylopeptoid tetramer III-4(c,d)(2,4).

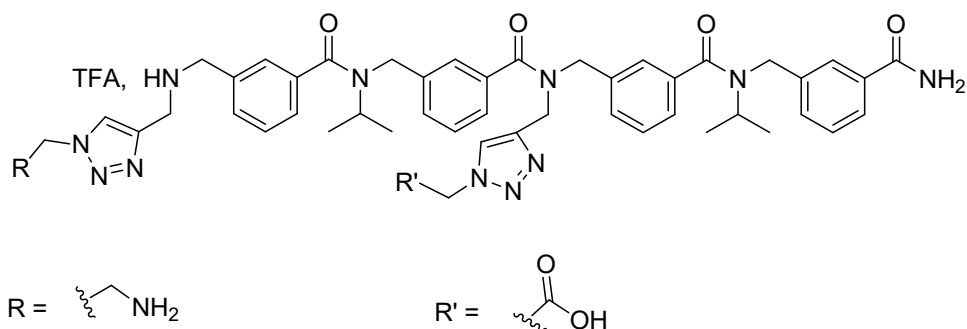

Tetramer III-4(c,d)(2,4) was synthesised according general procedure A then general procedure B using 100 mg of RA resin (0.054 mmol)

$m_{\text{crude}} = 78\text{mg}$  (purity 87%), crude yield 119%

$m_{\text{pure}} = 50\text{mg}$  (purity 91%), isolated yield 68%

LCMS pic at 2.42 min: HRMS (TOF MS ES+):  $m/z$  calcd for  $\text{C}_{48}\text{H}_{62}\text{N}_{13}\text{O}_4$   $[\text{M}+3\text{H}]^{3+}$ : 294.8343 found: 294.8342 (-0.71 ppm).

LCMS pic at 2.96 min: HRMS (TOF MS ES+):  $m/z$  calcd for  $\text{C}_{48}\text{H}_{58}\text{N}_{12}\text{O}_6$   $[\text{M}+2\text{H}]^{2+}$ : 449.2296; found: 449.22957 (0.18 ppm).

LCMS pic at 3.02 min: HRMS (TOF MS ES+):  $m/z$  calcd for  $\text{C}_{48}\text{H}_{58}\text{N}_{12}\text{O}_6$   $[\text{M}+2\text{H}]^{2+}$ : 449.2296; found: 449.22957 (-0.03 ppm).

LCMS pic at 3.60 min: HRMS (TOF MS ES+):  $m/z$  calcd for  $\text{C}_{48}\text{H}_{55}\text{N}_{11}\text{O}_8$   $[\text{M}+2\text{H}]^{2+}$ : 456.7112; found: 456.71121 (0.01 ppm).

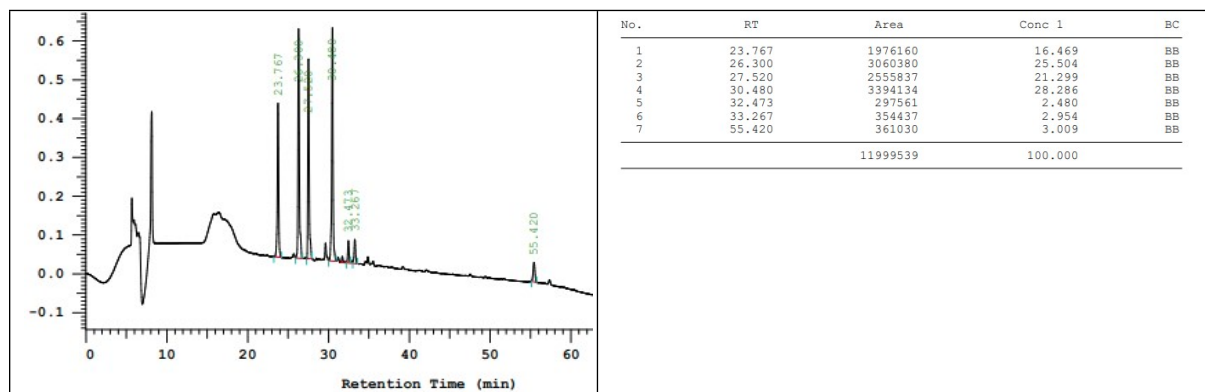

Figure S40 HPLC chromatogram of purified III-4(c,d)(2,4).

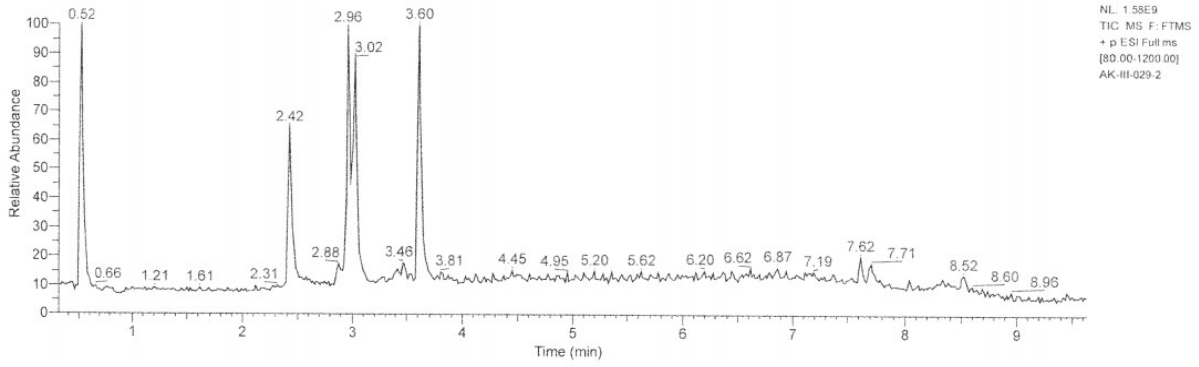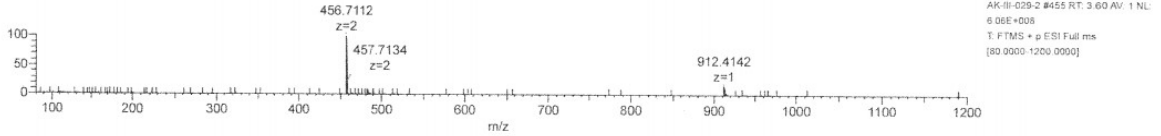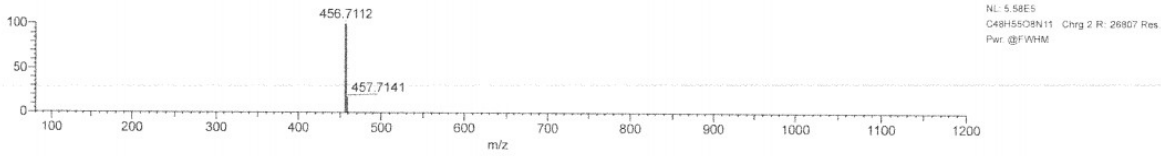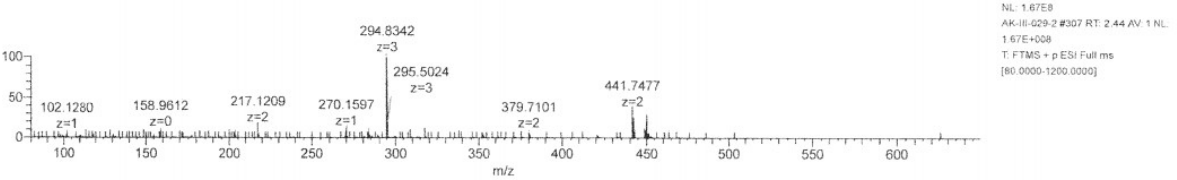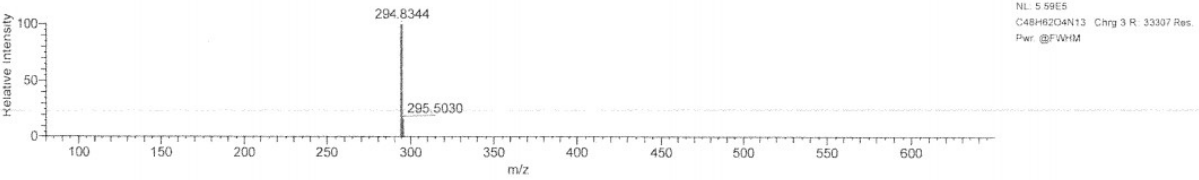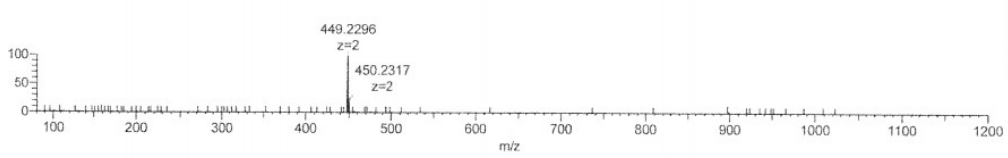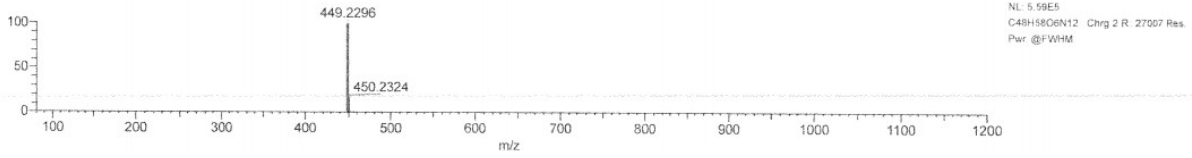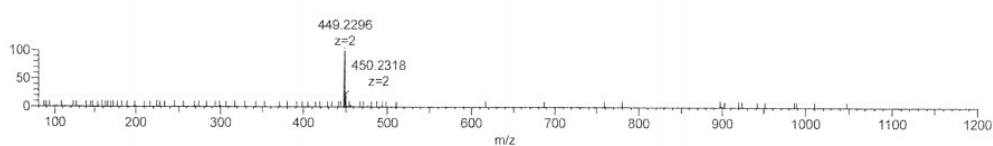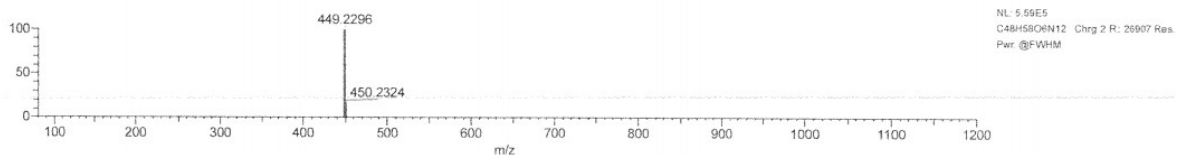

Figure S41 LCMS spectra of III-4(c,d)(2,4).

4.3.4- meta-arylopeptoid tetramer, III-4(d,e)(2,4).

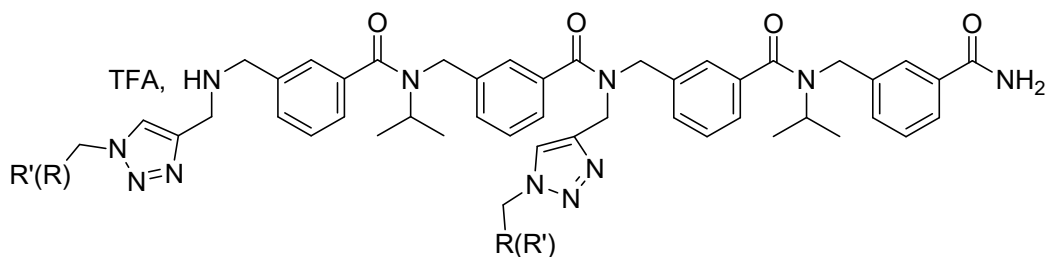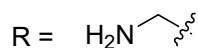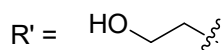

Tetramer III-4(d,e)(2,4) was synthesised according general procedure A then general procedure B using 25 mg of RA resin (0.0155 mmol)

$m_{\text{crude}} = 25 \text{ mg}$  (purity 81%), crude yield 118%

$m_{\text{pure}} = 17.8 \text{ mg}$  (purity 97%), isolated yield 84%

LCMS pic at 3.2 min: HRMS (TOF MS ES+):  $m/z$  calcd for  $\text{C}_{50}\text{H}_{63}\text{N}_{11}\text{O}_6$   $[\text{M}+2\text{H}]^{2+}$ : 456.74759; found: 456.747 (-1.21 ppm).

LCMS pic at 2.76 min: HRMS (TOF MS ES+):  $m/z$  calcd for  $\text{C}_{49}\text{H}_{62}\text{N}_{12}\text{O}_4$   $[\text{M}+2\text{H}]^{2+}$ : 449.24776; found: 449.2473 (-0.99 ppm).

LCMS pic at 2.74 min: HRMS (TOF MS ES+):  $m/z$  calcd  $\text{C}_{49}\text{H}_{61}\text{N}_{12}\text{O}_5$   $[\text{M}+2\text{H}]^{2+}$ : 897.48824; found: 897.4871 (-1.31 ppm).

LCMS pic at 2.44 min: HRMS (TOF MS ES+):  $m/z$   $\text{C}_{48}\text{H}_{61}\text{N}_{13}\text{O}_4$   $[\text{M}+2\text{H}]^{2+}$ : 441.74793; found: 441.7474 (-1.11 ppm).

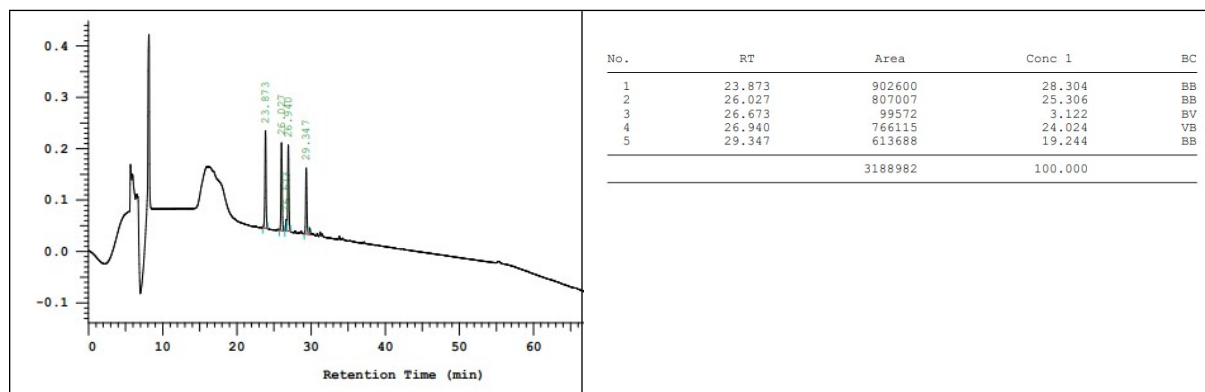

Figure S42 HPLC chromatogram of purified III-4(d,e)(2,4).

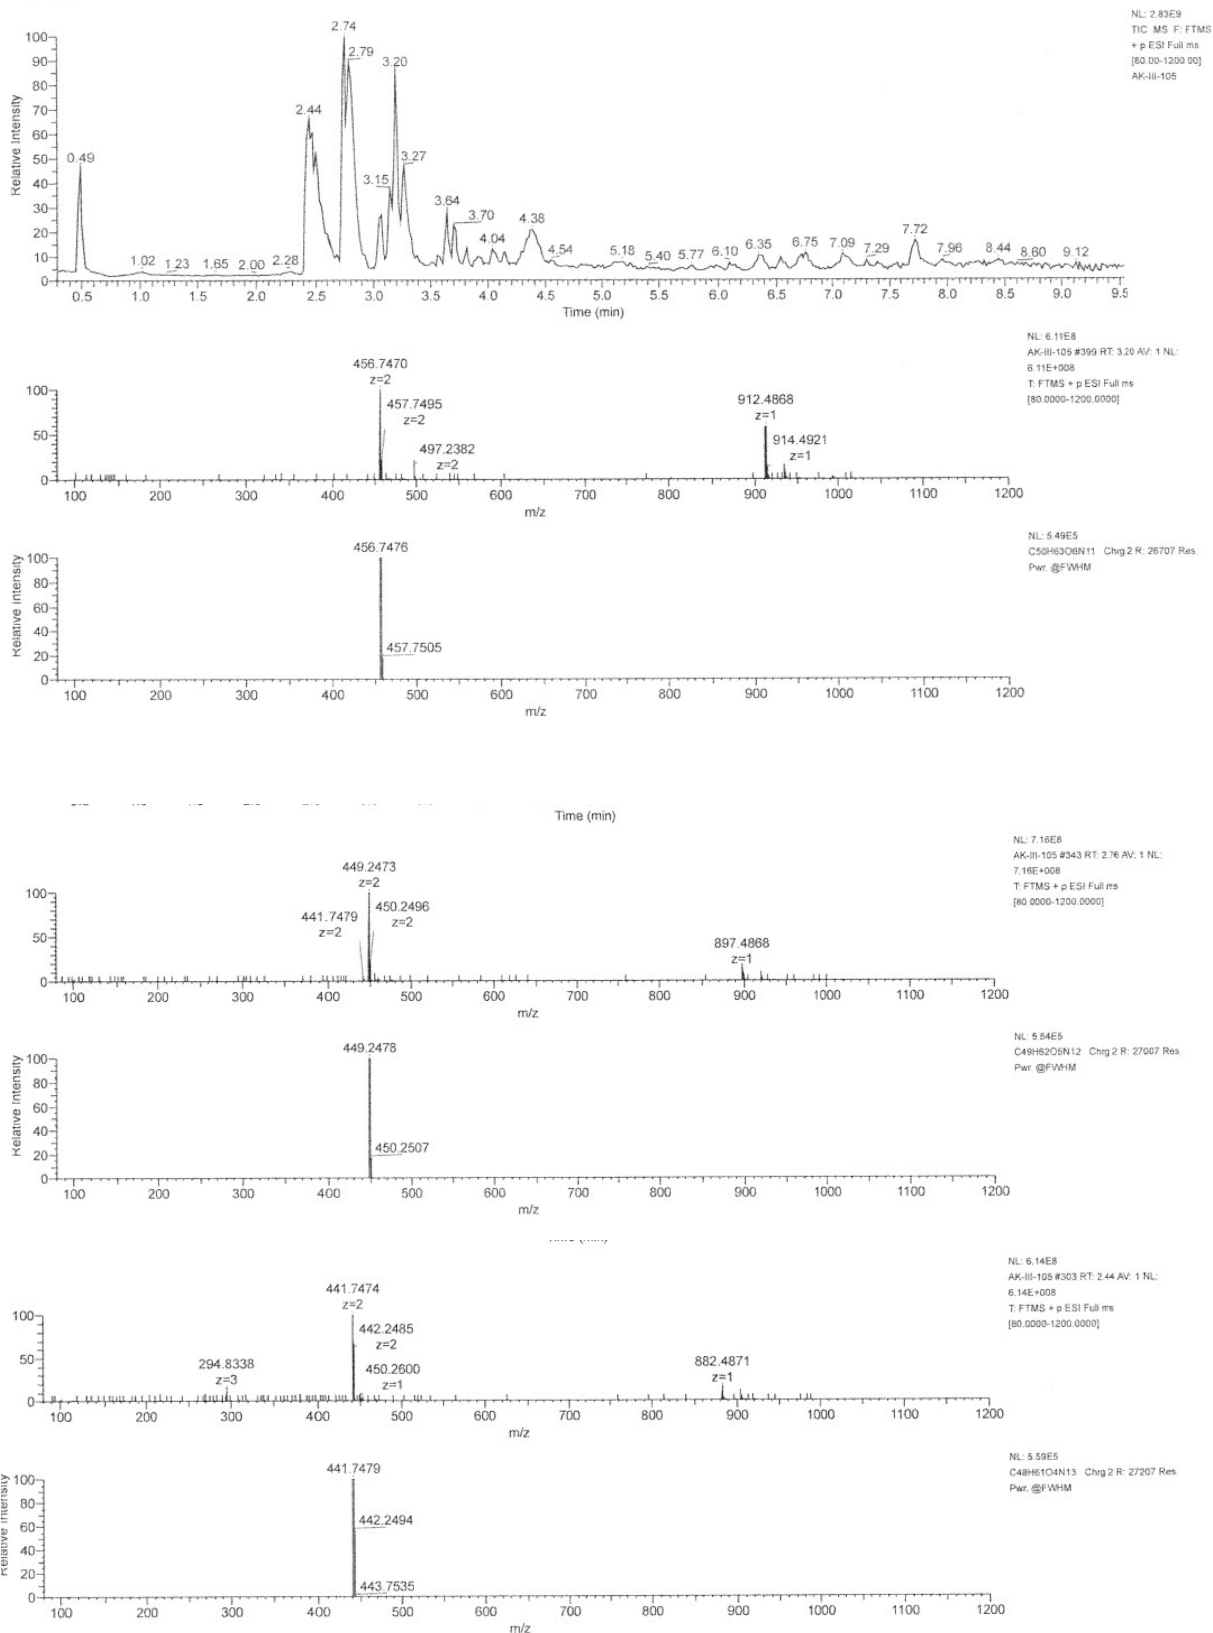

Figure S43 LCMS spectra of III-4(d,e)(2,4).

## 5- Synthesis and Characterization data of arylopeptoid hexamers

### 5.1.1-meta-arylopeptoid hexamer, III-6(Alk<sub>3,6</sub>).

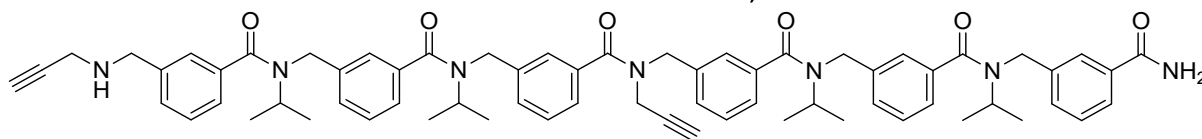

Hexamer III-6(Alk<sub>3,6</sub>) was synthesised according to general procedure A using 50 mg of RA resin (0.027 mmol), then cleavage by gently shaking a solution of TFA/TIS/H<sub>2</sub>O (95:2.5:2.5, 1mL) for 10 min at RT.

m<sub>crude</sub> = 33 mg, crude yield 118%

m<sub>pure</sub> = 24 mg (purity 94%), isolated yield 84%

HRMS (TOF MS ES+): *m/z* calcd for C<sub>66</sub>H<sub>74</sub>N<sub>7</sub>O<sub>6</sub> [M+H]<sup>+</sup>: 1060.56951; found: 1060.5684 (-1.08 ppm).

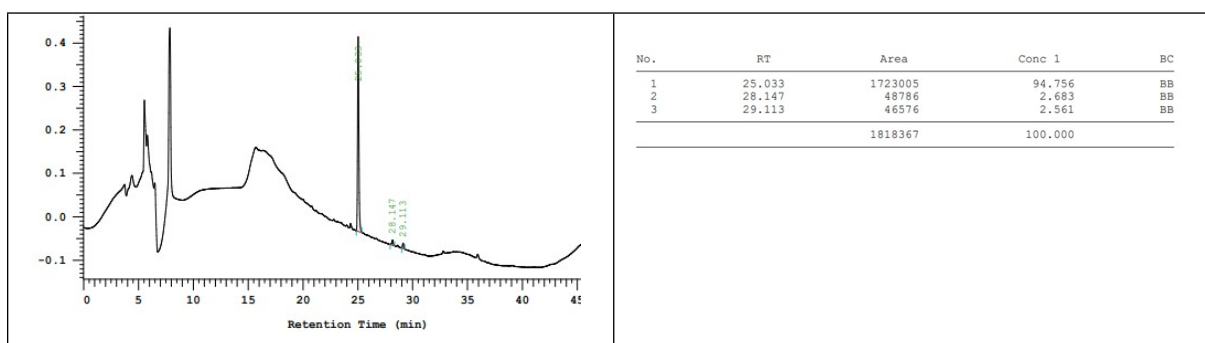

Figure S44 HPLC chromatogram of purified III-6(Alk<sub>3,6</sub>).

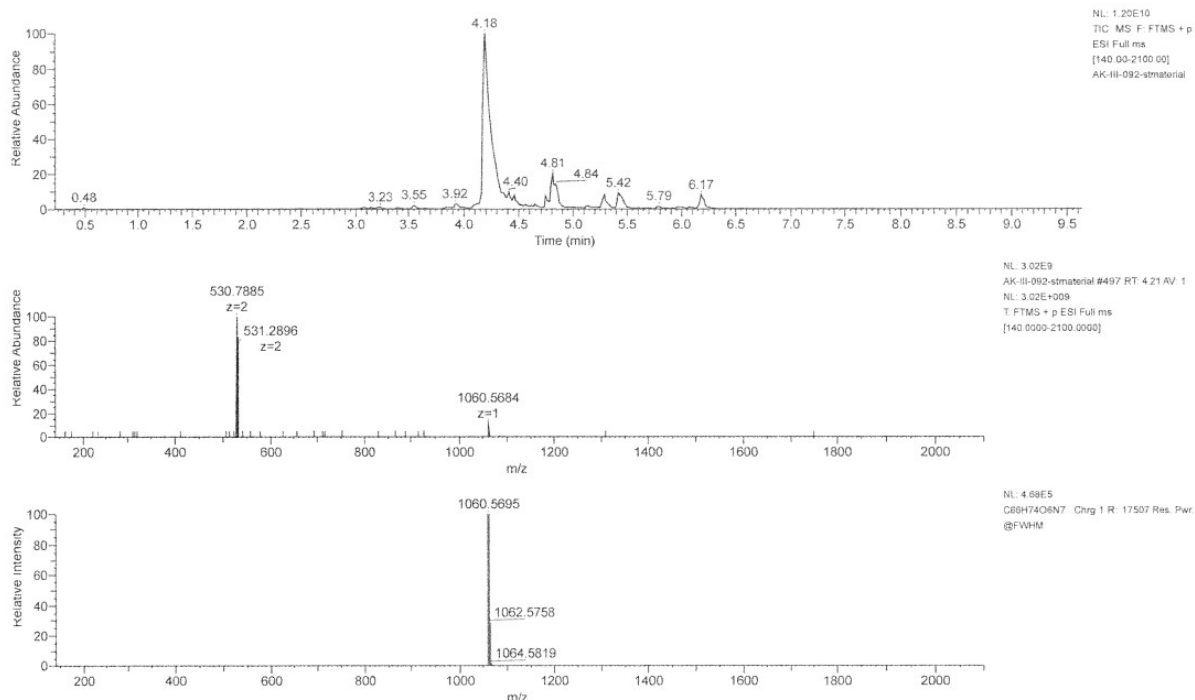

Figure S45 LCMS spectra of III-6(Alk<sub>3,6</sub>).

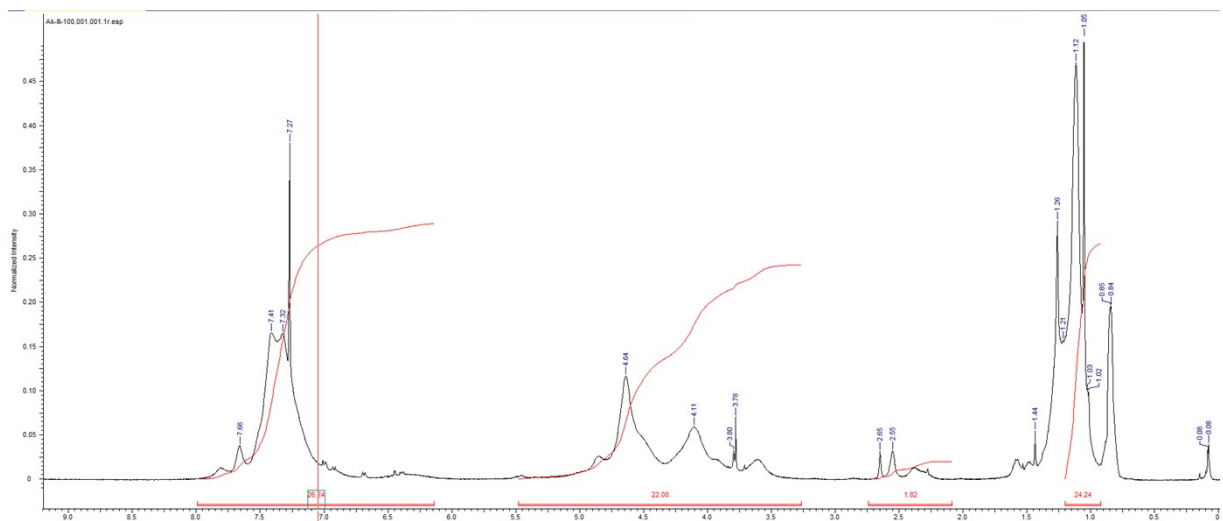

Figure 46  $^1\text{H-NMR}$  in  $\text{CDCl}_3$  of III-6(Alk3,6)

5.2-meta-arylopeptoid hexamer, **III-6(a<sub>3,6</sub>)**.

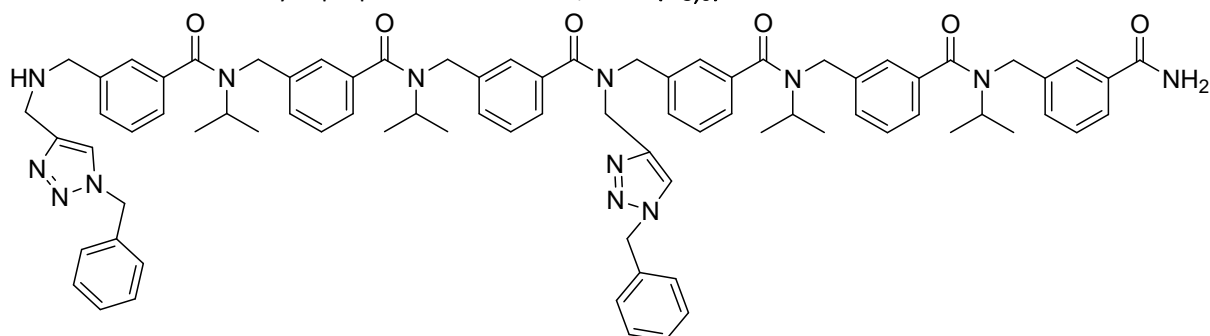

Hexamer **III-6(a<sub>3,6</sub>)** was synthesised according general procedure A then general procedure B using 50 mg of RA resin (0.027 mmol)

$m_{\text{crude}} = 42$  mg (purity 84%), crude yield 117%

$m_{\text{pure}} = 28.2$  mg (purity 94%), isolated yield 85%

HRMS (TOF MS ES<sup>+</sup>):  $m/z$  calcd for C<sub>80</sub>H<sub>88</sub>N<sub>13</sub>O<sub>6</sub> [M+H]<sup>+</sup>: 1326.6975; found: 1326.6975 (0 ppm).

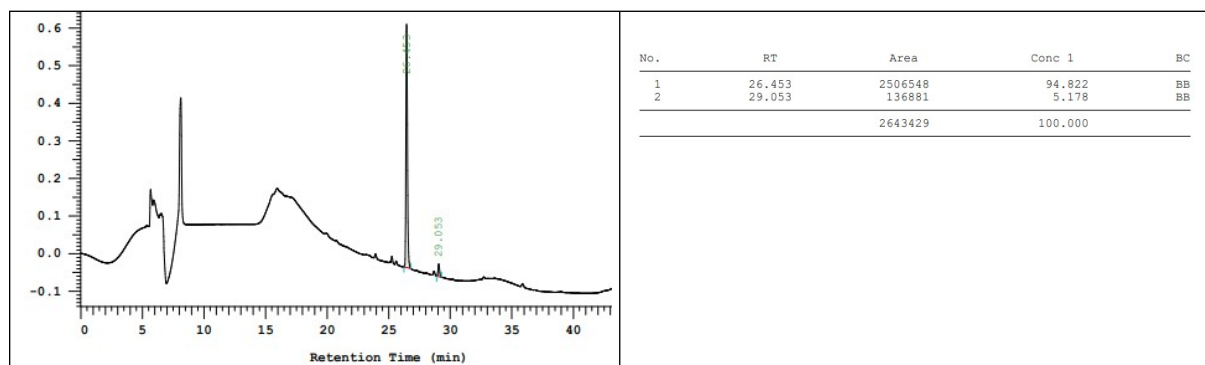

Figure S47 HPLC chromatogram of purified **III-6(a<sub>3,6</sub>)**.

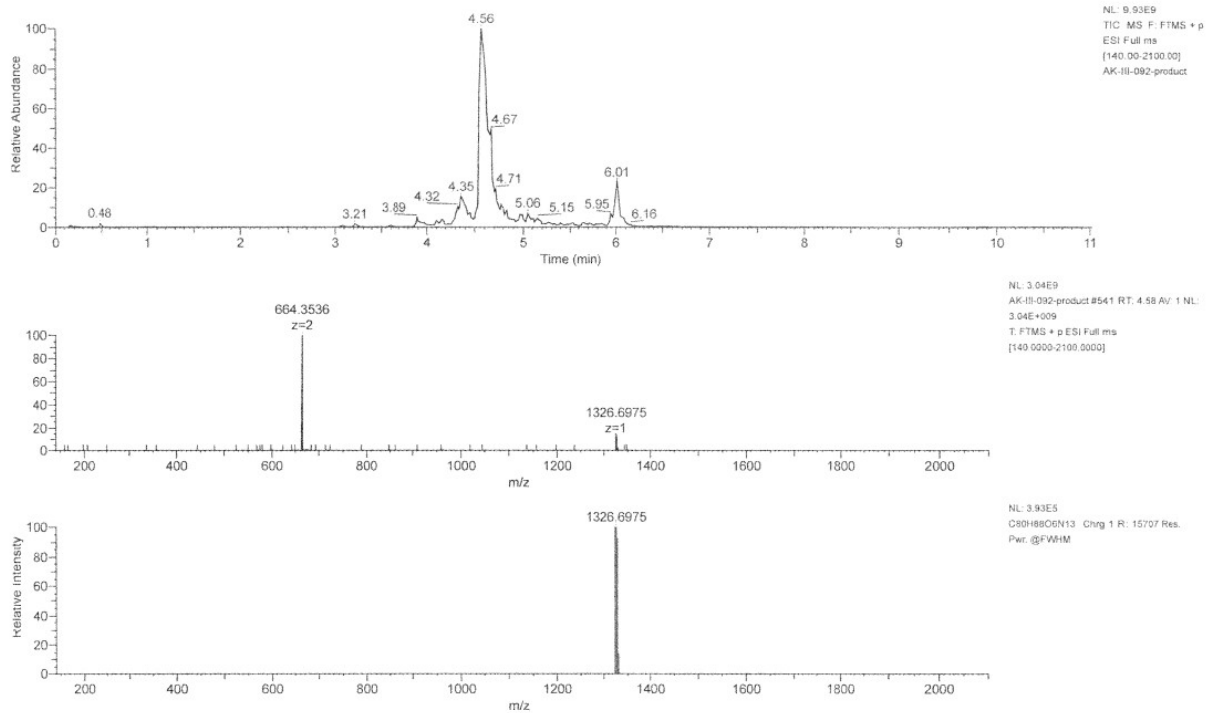

Figure S48 LCMS spectra of III-6(a<sub>3,6</sub>).



## 5.2- Starting material, III-6(Alk<sub>2,4,6</sub>).

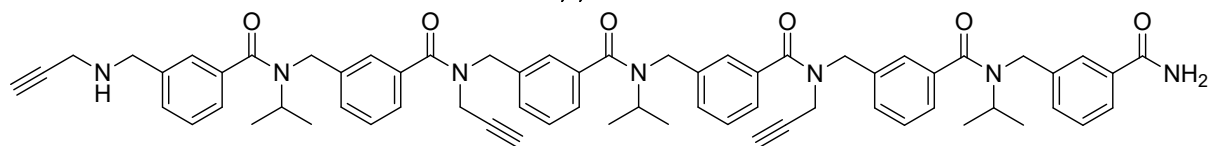

Hexamer III-6(Alk<sub>2,4,6</sub>) was synthesised according to general procedure A using 100 mg of RA resin (0.054 mmol), then cleavage by gently shaking a solution of TFA/TIS/H<sub>2</sub>O (95:2.5:2.5, 1mL) for 10 min at RT.

$m_{\text{crude}} = 77\text{mg}$  (purity 85%), crude yield 121%

$m_{\text{pure}} = 50.2\text{mg}$  (purity 97%), isolated yield 87%

HRMS (TOF MS ES+):  $m/z$  calcd for C<sub>80</sub>H<sub>88</sub>N<sub>13</sub>O<sub>6</sub> [M+H]<sup>+</sup>: 1056.53821; found: 1056.5367 (-1.39ppm).

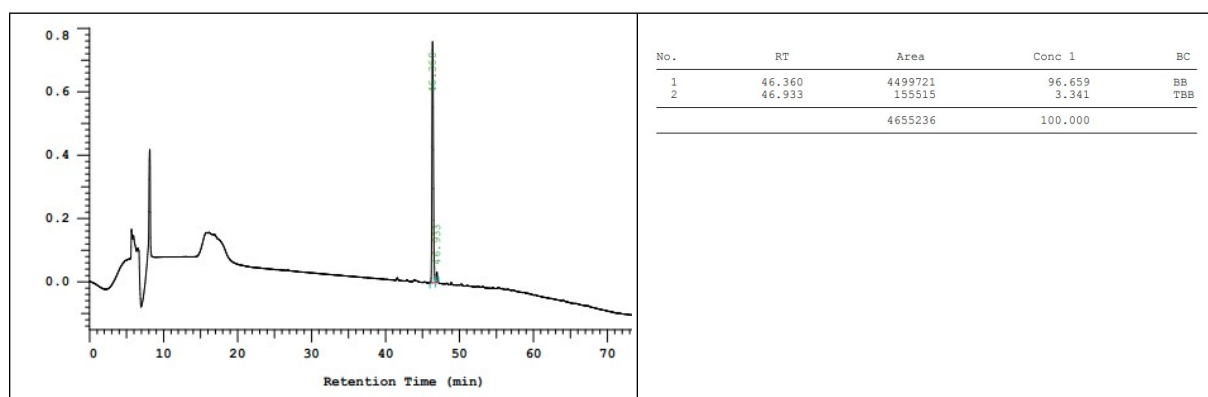

Figure S49 HPLC chromatogram of purified III-6(Alk<sub>2,4,6</sub>)

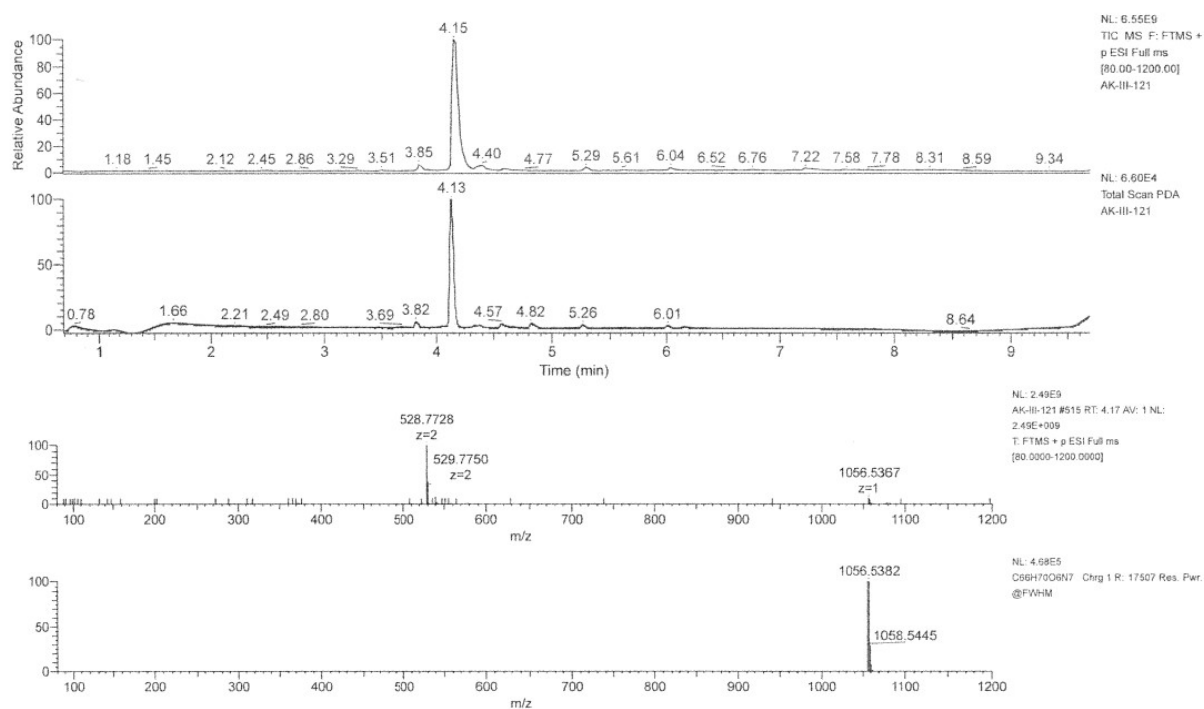

Figure S50 LCMS spectra of III-6(Alk<sub>2,4,6</sub>).

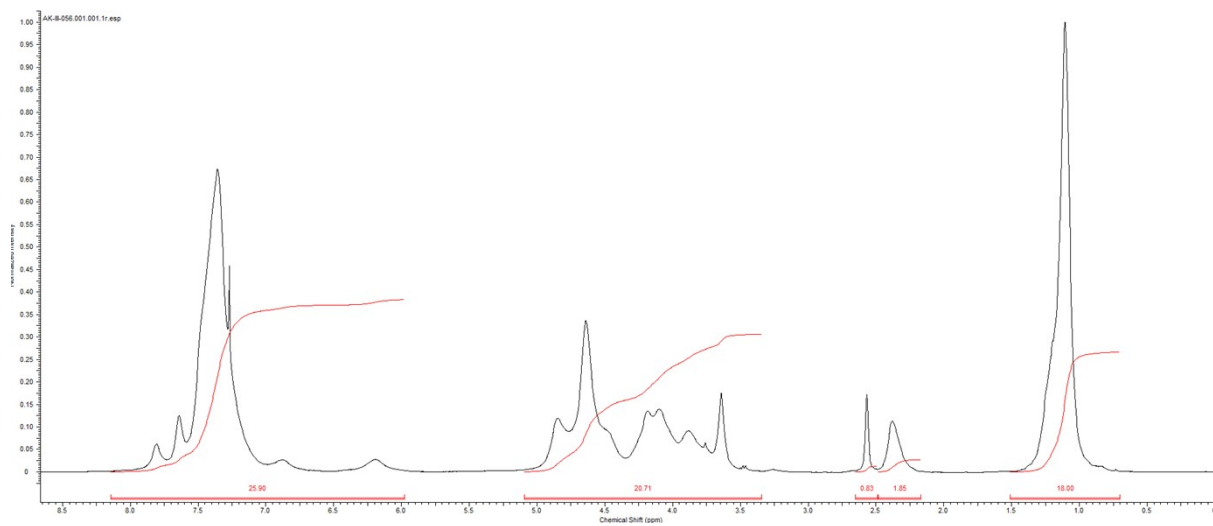

Figure S51  $^1\text{H-NMR}$  spectra in  $\text{CDCl}_3$  of **III-6(Alk<sub>2,4,6</sub>)**

## 5.2- Homo-clicked arylopeptoids

### 5.2.1- meta-arylopeptoid hexamer, III-6(a<sub>2,4,6</sub>).

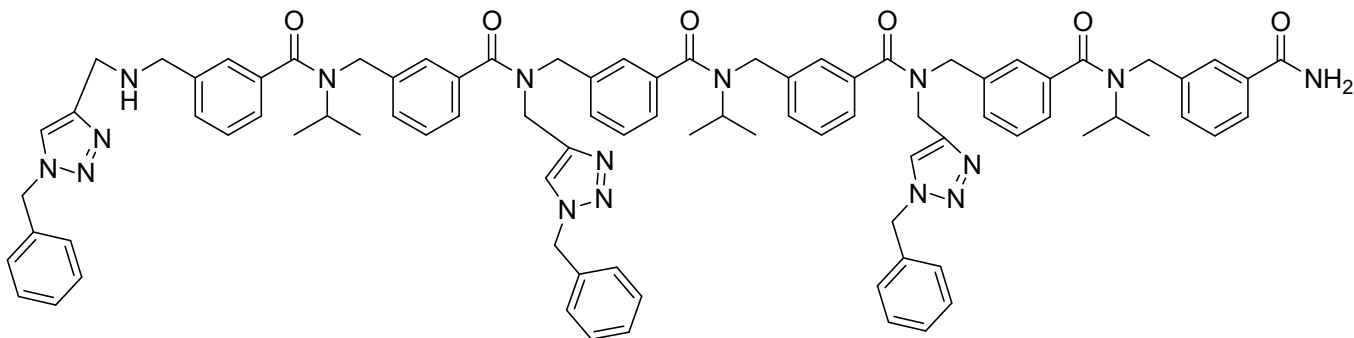

Hexamer III-6(a<sub>2,4,6</sub>) was synthesised according general procedure A then general procedure B using 100 mg of RA resin (0.054 mmol)

m<sub>crude</sub> = 116 mg (purity 87%), crude yield 137%

m<sub>pure</sub> = 64 mg (purity 88%), isolated yield 78%

HRMS (TOF MS ES<sup>+</sup>): *m/z* calcd for C<sub>87</sub>H<sub>91</sub>N<sub>16</sub>O<sub>6</sub> [M+H]<sup>+</sup>: 1455.7302; found: 1455.7341 (2.7 ppm).

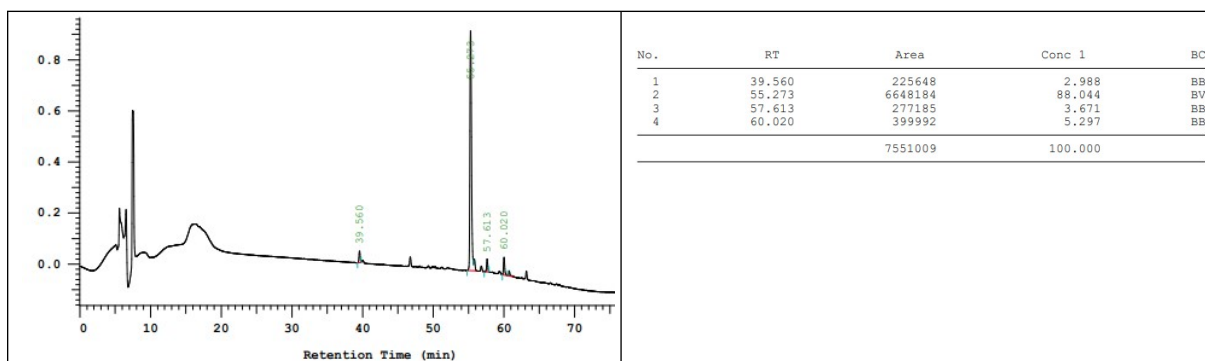

Figure S52 HPLC chromatogram of purified III-6(a<sub>2,4,6</sub>).

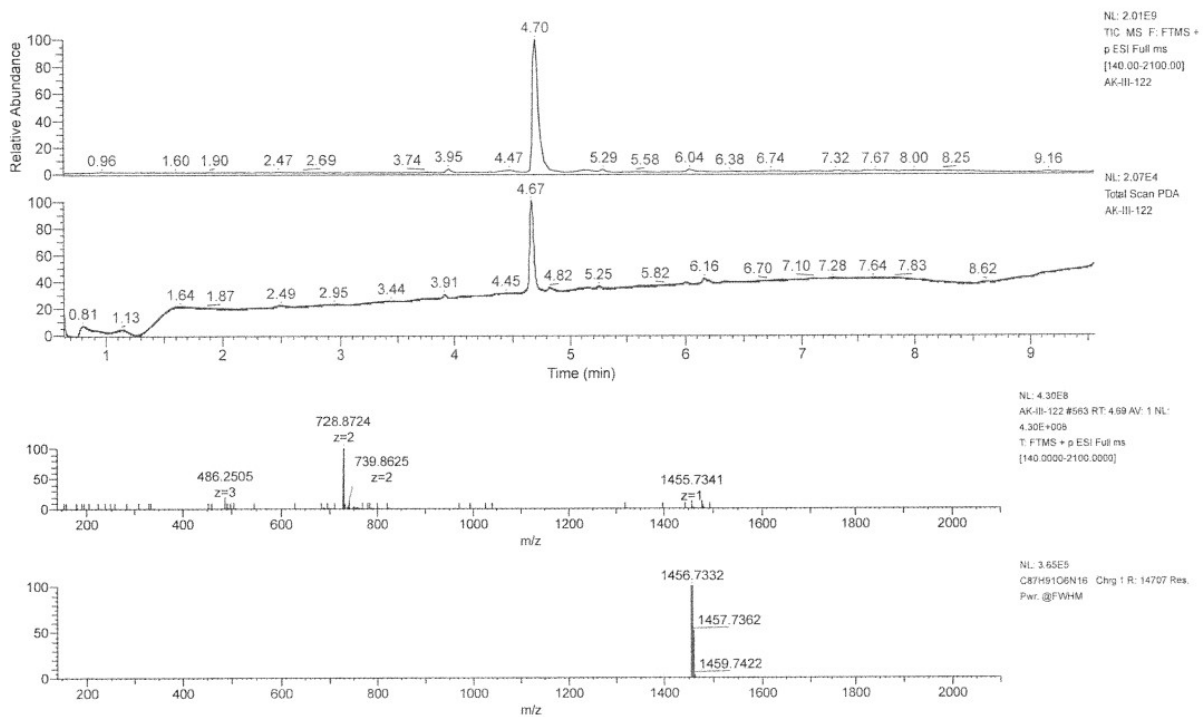

Figure S53 LCMS spectra of III-6( $\alpha_{2,4,6}$ ).

5.2.2- meta-arylopeptoid hexamer, **III-6(b<sub>2,4,6</sub>)**.

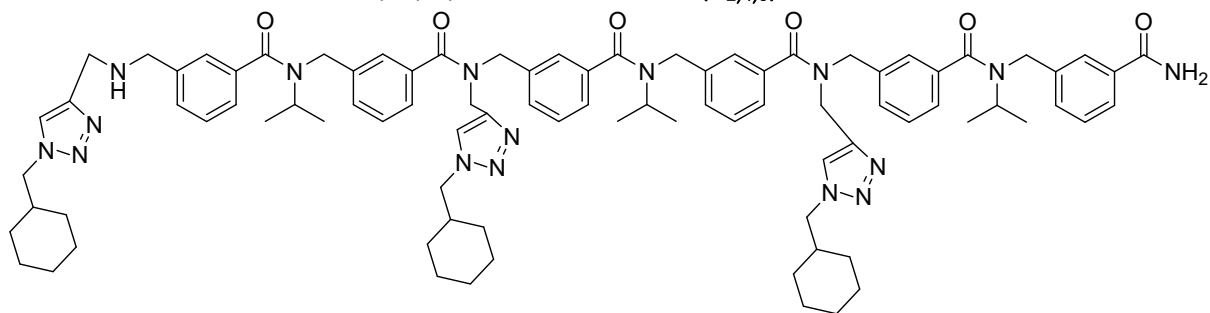

Hexamer **III-6(b<sub>2,4,6</sub>)** was synthesised according general procedure A then general procedure B using 50 mg of RA resin (0.027 mmol)

$m_{\text{crude}} = 38 \text{ mg}$  (purity 86%), crude yield 96%

$m_{\text{pure}} = 30 \text{ mg}$  (purity 91%), isolated yield 76%

HRMS (TOF MS ES<sup>+</sup>):  $m/z$  calcd for  $\text{C}_{87}\text{H}_{110}\text{N}_{16}\text{O}_6$   $[\text{M}+\text{H}]^{2+}$ : 737.43916; found: 737.4398 (0.81 ppm).

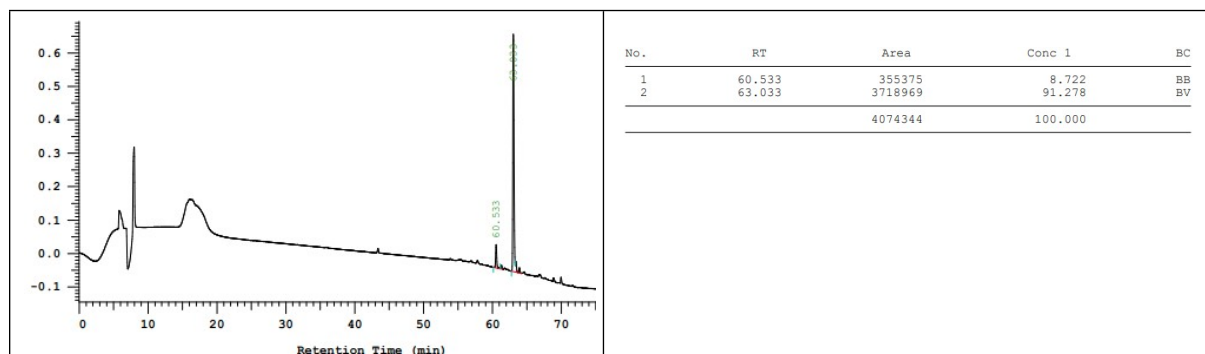

Figure S54 HPLC chromatogram of purified **III-6(b<sub>2,4,6</sub>)**.

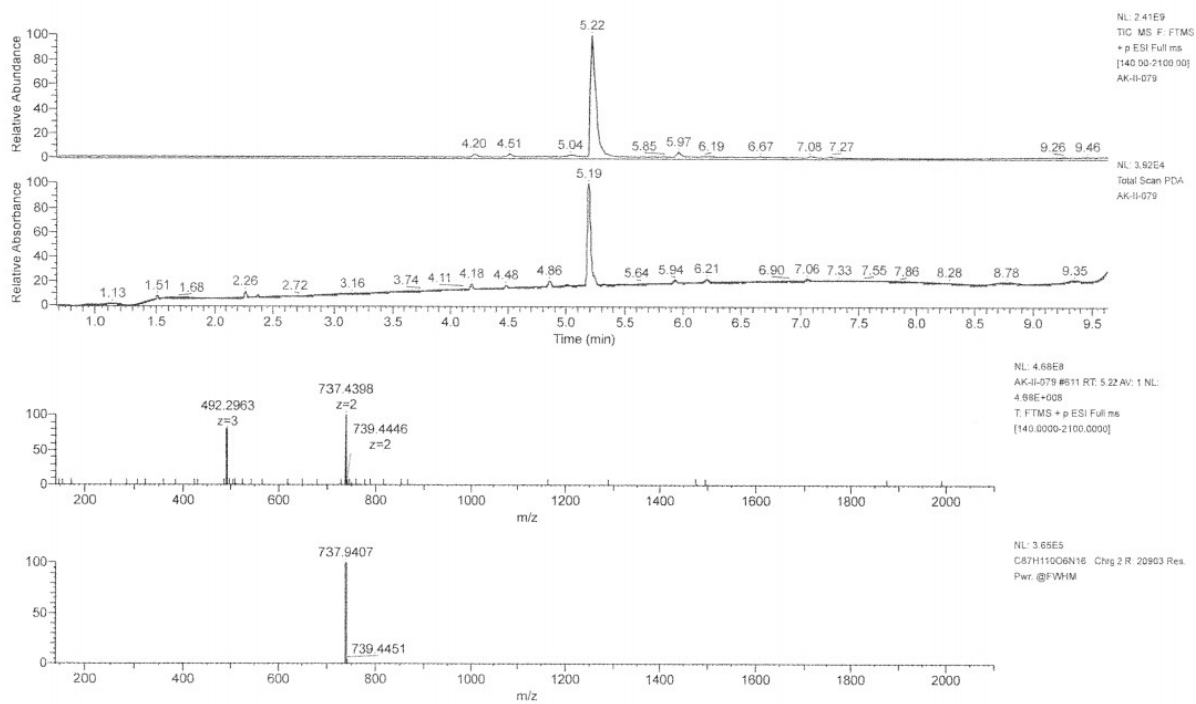

Figure S55 LCMS spectra of III-6(b<sub>2,4,6</sub>).

5.2.3- meta-arylopeptoid hexamer, III-6(C<sub>2,4,6</sub>).

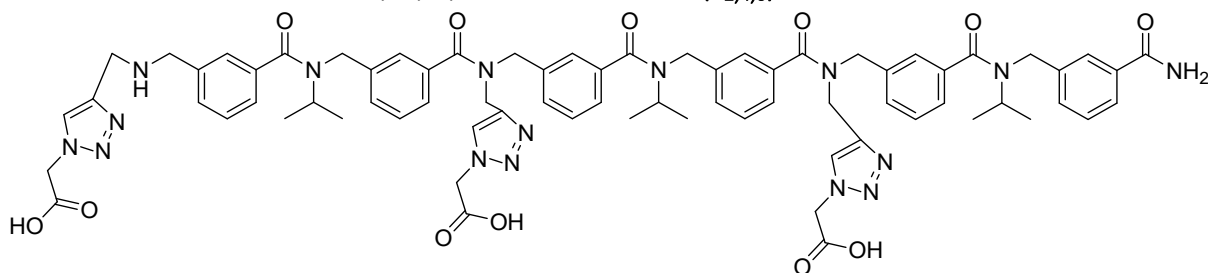

Hexamer III-6(C<sub>2,4,6</sub>) was synthesised according general procedure A then general procedure B using 100 mg of RA resin (0.054 mmol)

m<sub>crude</sub> = 90 mg (purity 85%), crude yield 113%

m<sub>pure</sub> = 49 mg (purity 94%), isolated yield 68%

HRMS (TOF MS ES+): *m/z* calcd for C<sub>72</sub>H<sub>80</sub>N<sub>16</sub>O<sub>12</sub> [M+2H]<sup>2+</sup>: 680.30653; found: 680.3074 (1.33 ppm).

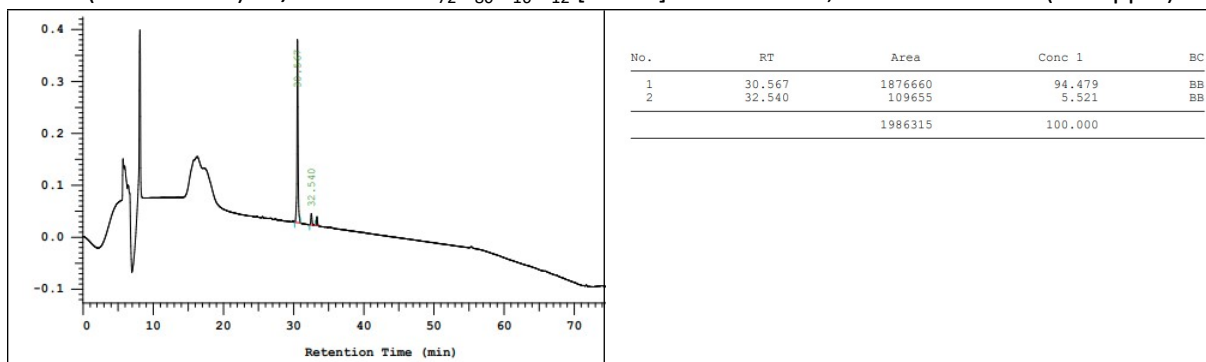

Figure 56 HPLC chromatogram of purified III-6(C<sub>2,4,6</sub>).

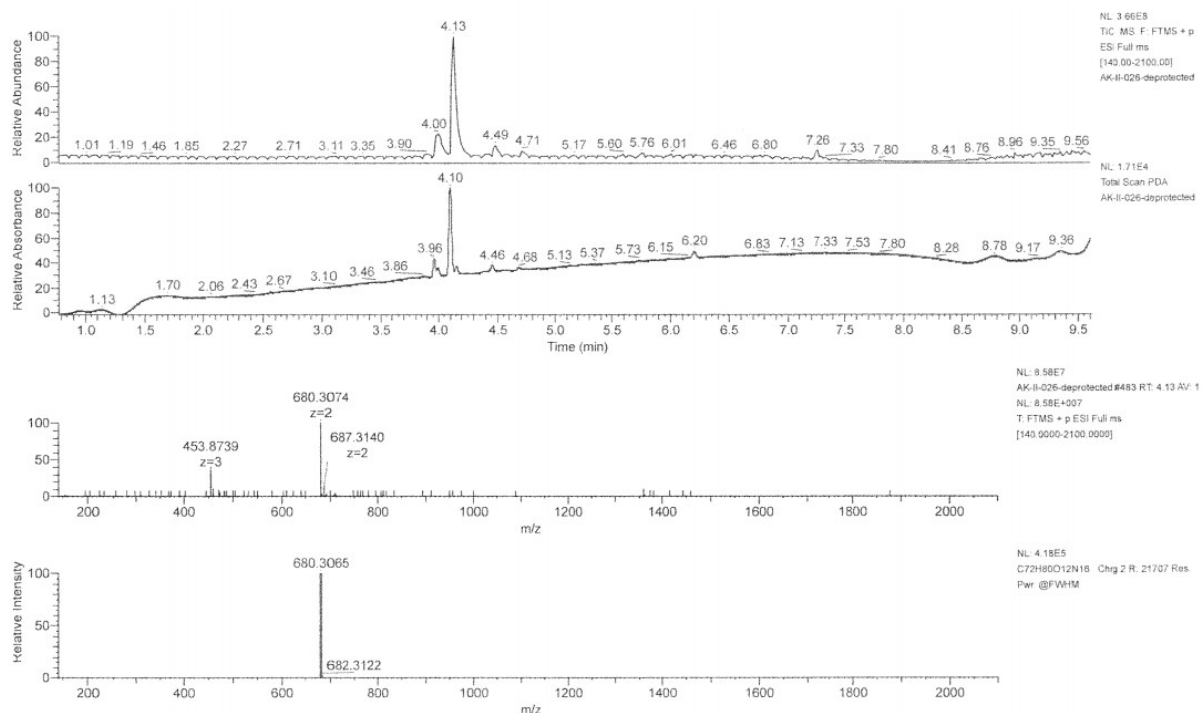

Figure 57 LCMS spectra of III-6(C<sub>2,4,6</sub>).

### 5.2.4- meta-arylopeptoid hexamer, III-6(d<sub>2,4,6</sub>).

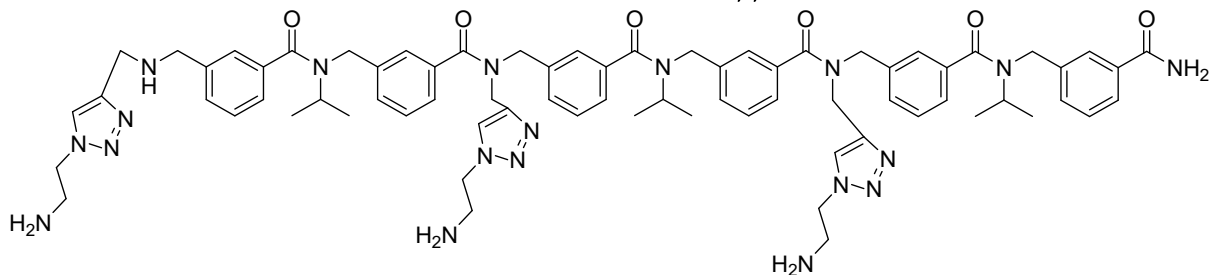

Hexamer III-6(d<sub>2,4,6</sub>) was synthesised according general procedure A then general procedure B using 100 mg of RA resin (0.054 mmol)

m<sub>crude</sub> = 116 mg (purity 86%), crude yield 98%

m<sub>pure</sub> = 64 mg (purity 93%), isolated yield 70%

HRMS (TOF MS ES+): *m/z* calcd for C<sub>72</sub>H<sub>90</sub>N<sub>19</sub>O<sub>12</sub> [M+3H]<sup>3+</sup>: 438.91017; found: 438.9101 (-0.09ppm).

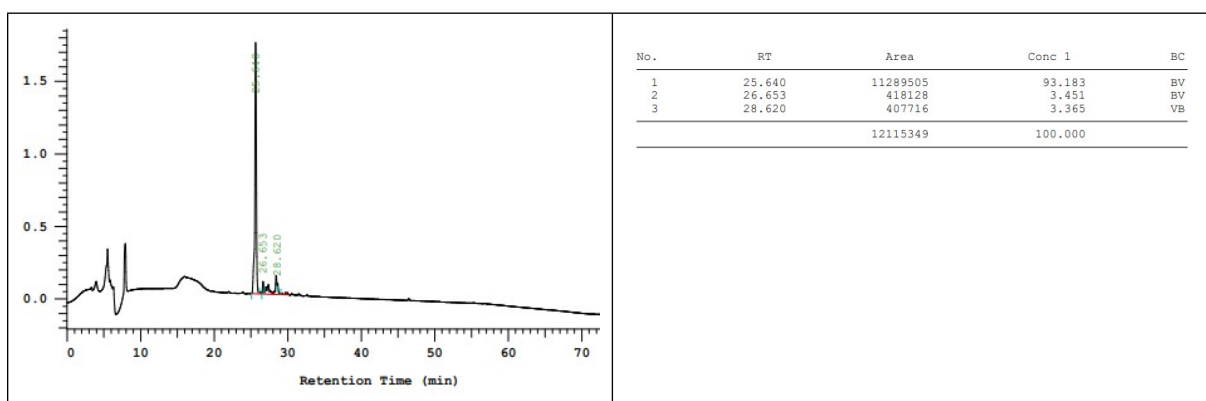

Figure 58 HPLC chromatogram of purified III-6(d<sub>2,4,6</sub>).

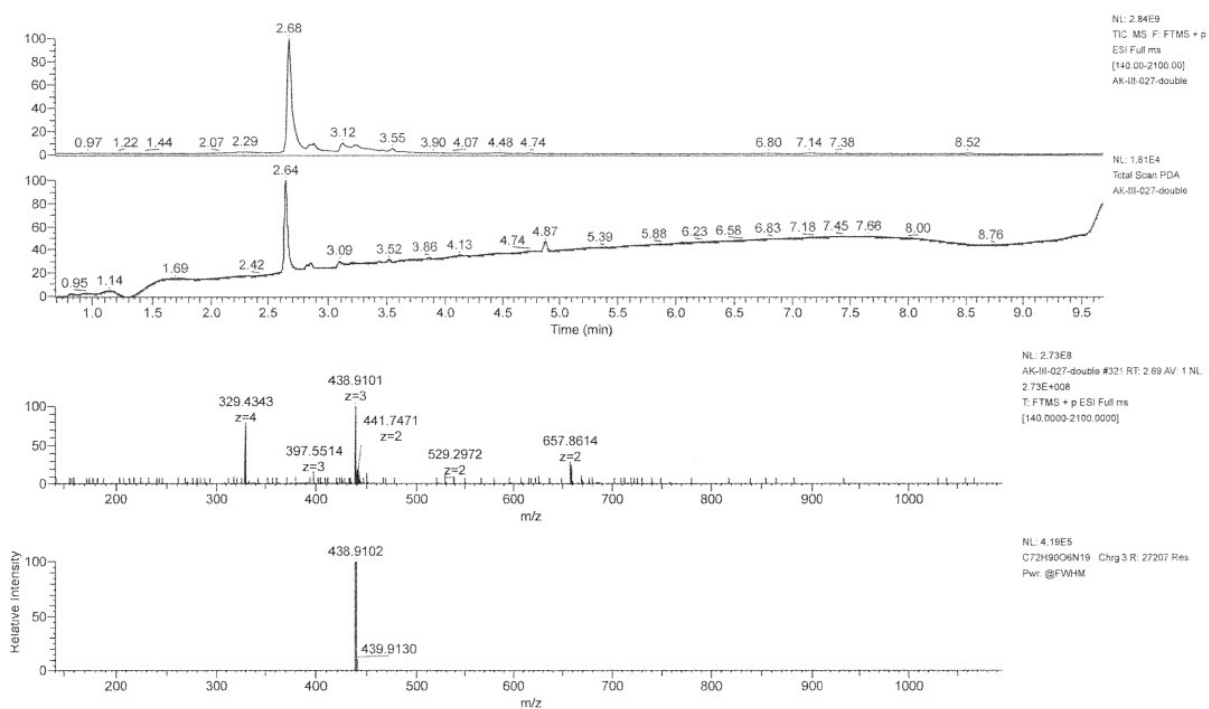

Figure 59 LCMS spectra of III-6(d<sub>2,4,6</sub>).



5.2.5- meta-arylopeptoid hexamer, III-6(e<sub>2,4,6</sub>).

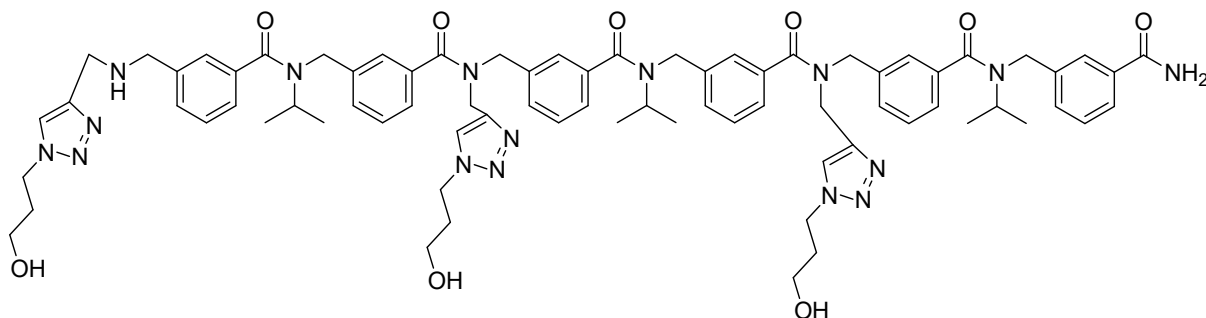

Hexamer III-6(e<sub>2,4,6</sub>) was synthesised according general procedure A then general procedure B using 50 mg of RA resin (0.027 mmol)

m<sub>crude</sub> = 46 mg (purity 86%), crude yield 116%

m<sub>pure</sub> = 33.80 mg (purity 100%), isolated yield 82%

HRMS (TOF MS ES+): *m/z* calcd for C<sub>75</sub>H<sub>92</sub>N<sub>16</sub>O<sub>9</sub> [M+2H]<sup>2+</sup>: 680.36111; found: 680.3602 (-1.38 ppm).

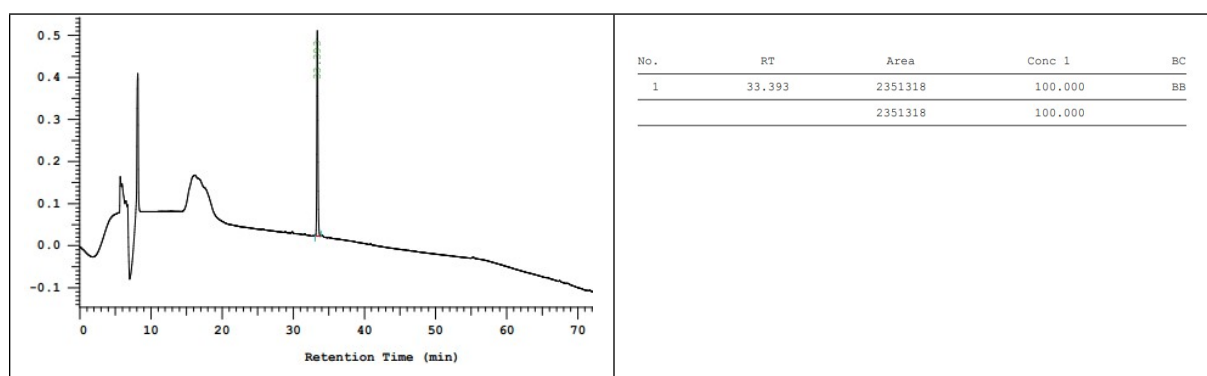

Figure 60 HPLC chromatogram of purified III-6(e<sub>2,4,6</sub>).

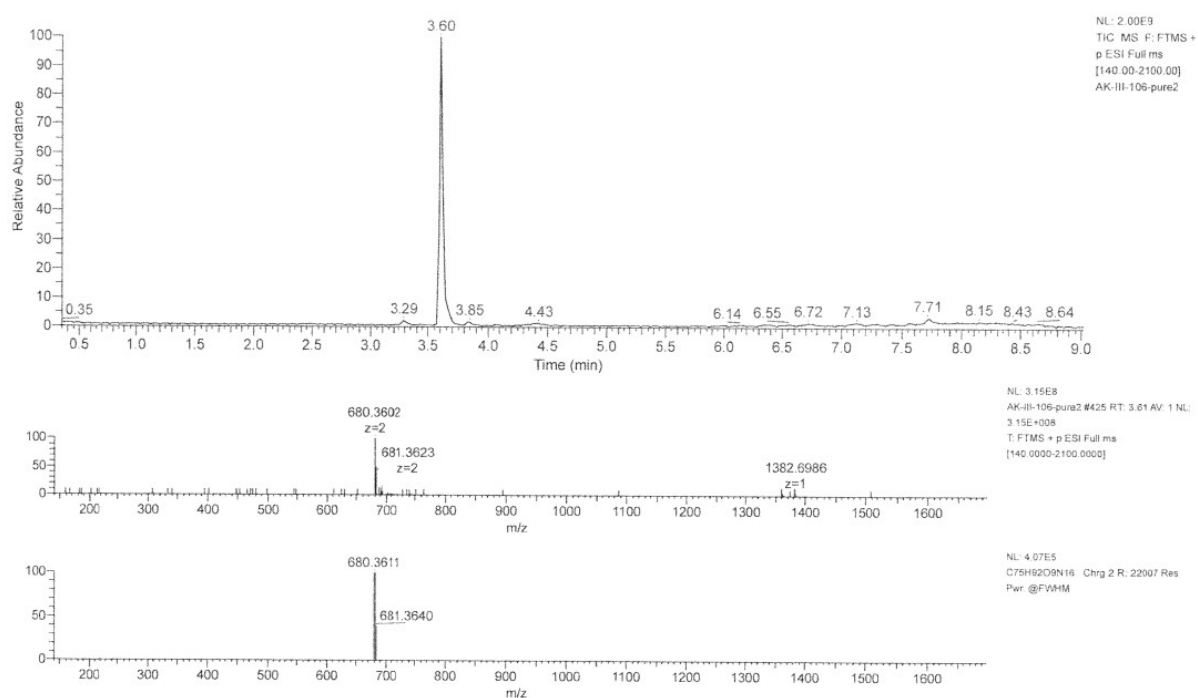

Figure S61 LCMS spectra of III-6(e<sub>2,4,6</sub>).

### 5.3- Combinatorial on hexamer

#### 5.3.1- Meta-arylopeptoid hexamer III-6(a,c)(2,4,6).

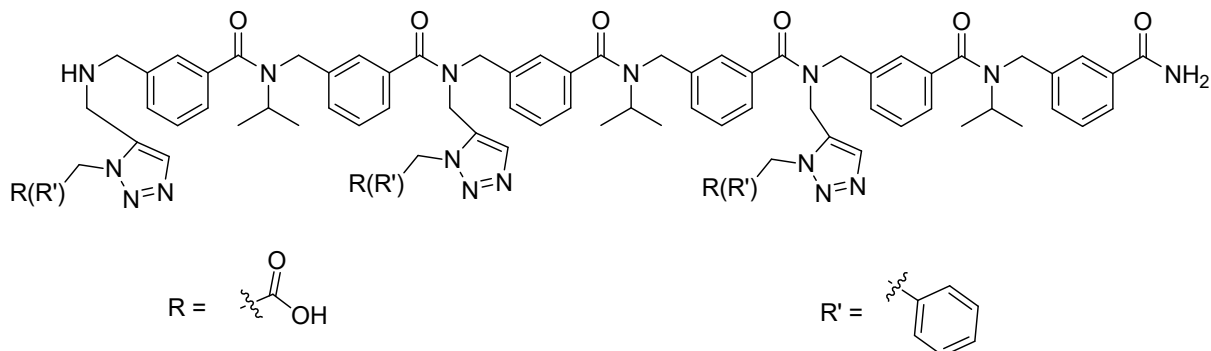

Hexamer III-6(a,c)(2,4,6) was synthesised according general procedure A then general procedure B using 100 mg of RA resin (0.054 mmol)

$m_{\text{crude}} = 122$  mg (purity 89%), crude yield 159%

$m_{\text{pure}} = 51$  mg (purity 98%), isolated yield 67%

LCMS pic at 4.12 min: HRMS (TOF MS ES+):  $m/z$  calcd for  $C_{72}H_{80}N_{16}O_{12}$  [M+2H]<sup>2+</sup>: 680.30653 found: 680.3069 (0.52 ppm)

LCMS pic at 4.27 min: HRMS (TOF MS ES+):  $m/z$  calcd for  $C_{77}H_{84}N_{16}O_{10}$  [M+2H]<sup>2+</sup>: 696.32727 found: 696.3272 (-0.08 ppm)

LCMS pic at 4.42 min: HRMS (TOF MS ES+):  $m/z$  calcd for  $C_{77}H_{84}N_{16}O_{10}$  [M+2H]<sup>2+</sup>: 696.32727 found: 696.3273 (0.09 ppm)

LCMS pic at 4.73 min: HRMS (TOF MS ES+):  $m/z$  calcd for  $C_{77}H_{90}N_{16}O_{10}$  [M+2H]<sup>2+</sup>: 699.35074 found: 699.3508 (0.05 ppm)

LCMS pic at 4.5 min: HRMS (TOF MS ES+):  $m/z$  calcd for  $C_{77}H_{84}N_{16}O_{10}$  [M+2H]<sup>2+</sup>: 696.32727 found: 696.3275 (0.27 ppm)

LCMS pic at 4.5 min: HRMS (TOF MS ES+):  $m/z$  calcd for  $C_{82}H_{88}N_{16}O_8$  [M+2H]<sup>2+</sup>: 712.348 found: 712.3472 (-1.09 ppm)

LCMS pic at 4.59 min: HRMS (TOF MS ES+):  $m/z$  calcd for  $C_{82}H_{88}N_{16}O_8$  [M+2H]<sup>2+</sup>: 712.348 found: 712.3477 (-0.4 ppm)

LCMS pic at 4.72 min: HRMS (TOF MS ES+):  $m/z$  calcd for  $C_{82}H_{88}N_{16}O_8$  [M+2H]<sup>2+</sup>: 712.348 found: 712.3477 (-0.4 ppm)

LCMS pic at 4.72 min: HRMS (TOF MS ES+):  $m/z$  calcd for  $C_{87}H_{92}N_{16}O_6$  [M+2H]<sup>2+</sup>: 728.36874 found: 728.368 (-1.04 ppm)

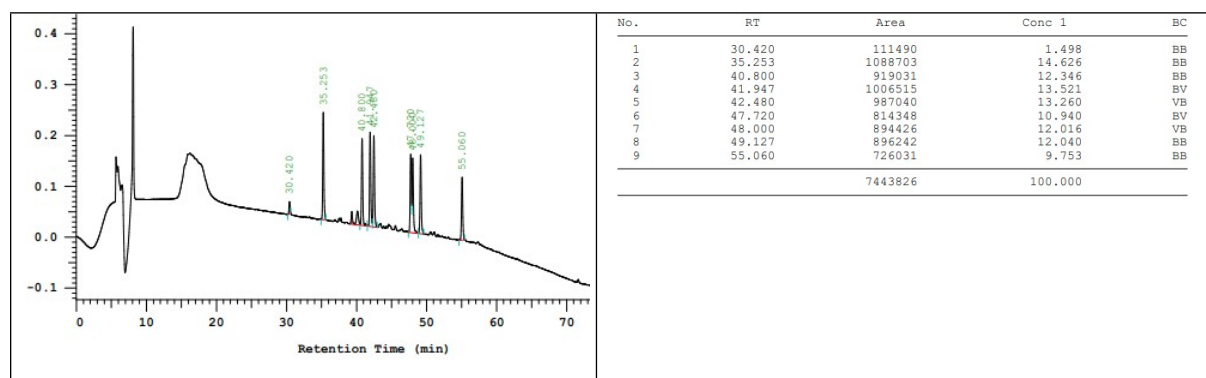

Figure S62 HPLC chromatogram of purified III-6(a,c)(2,4,6)

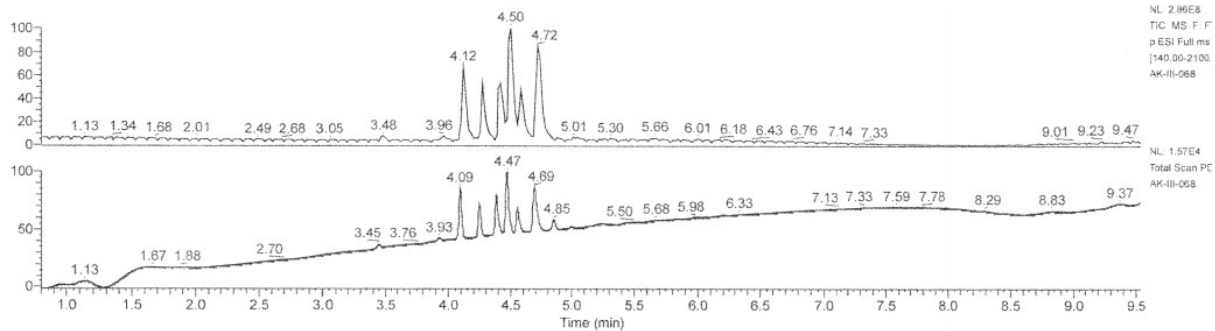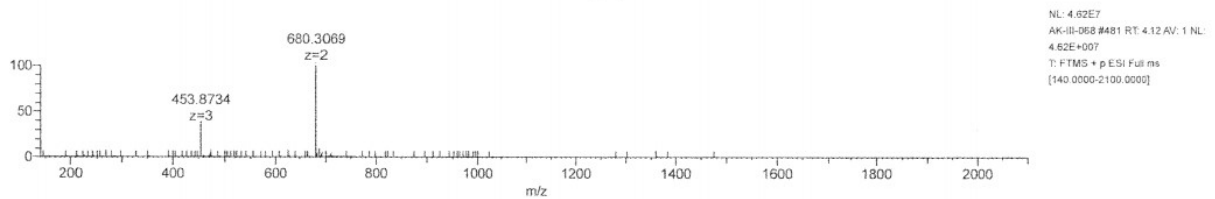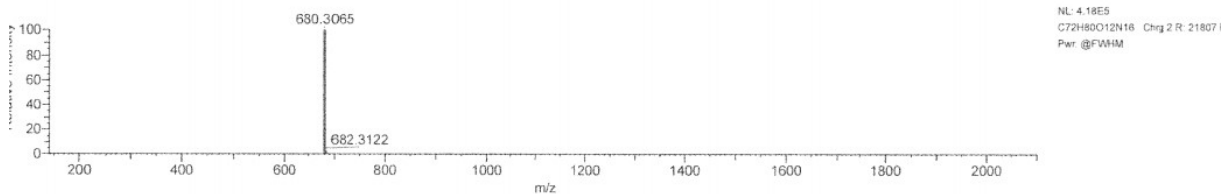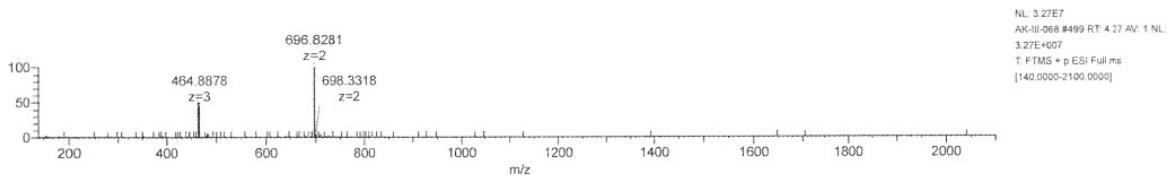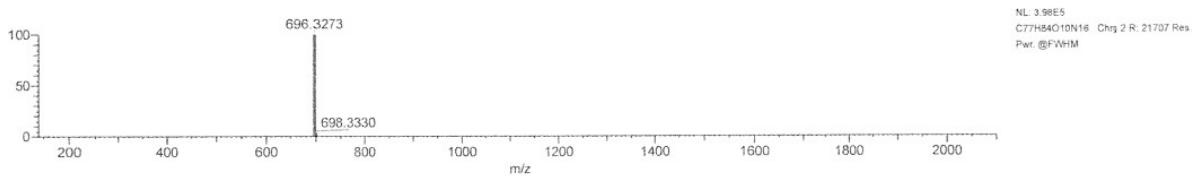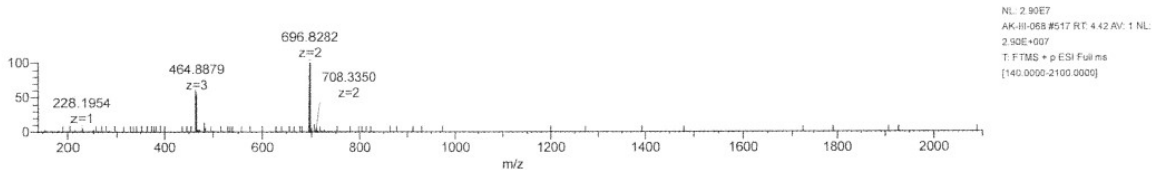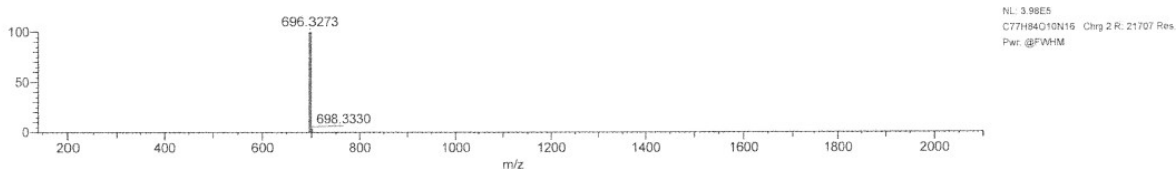

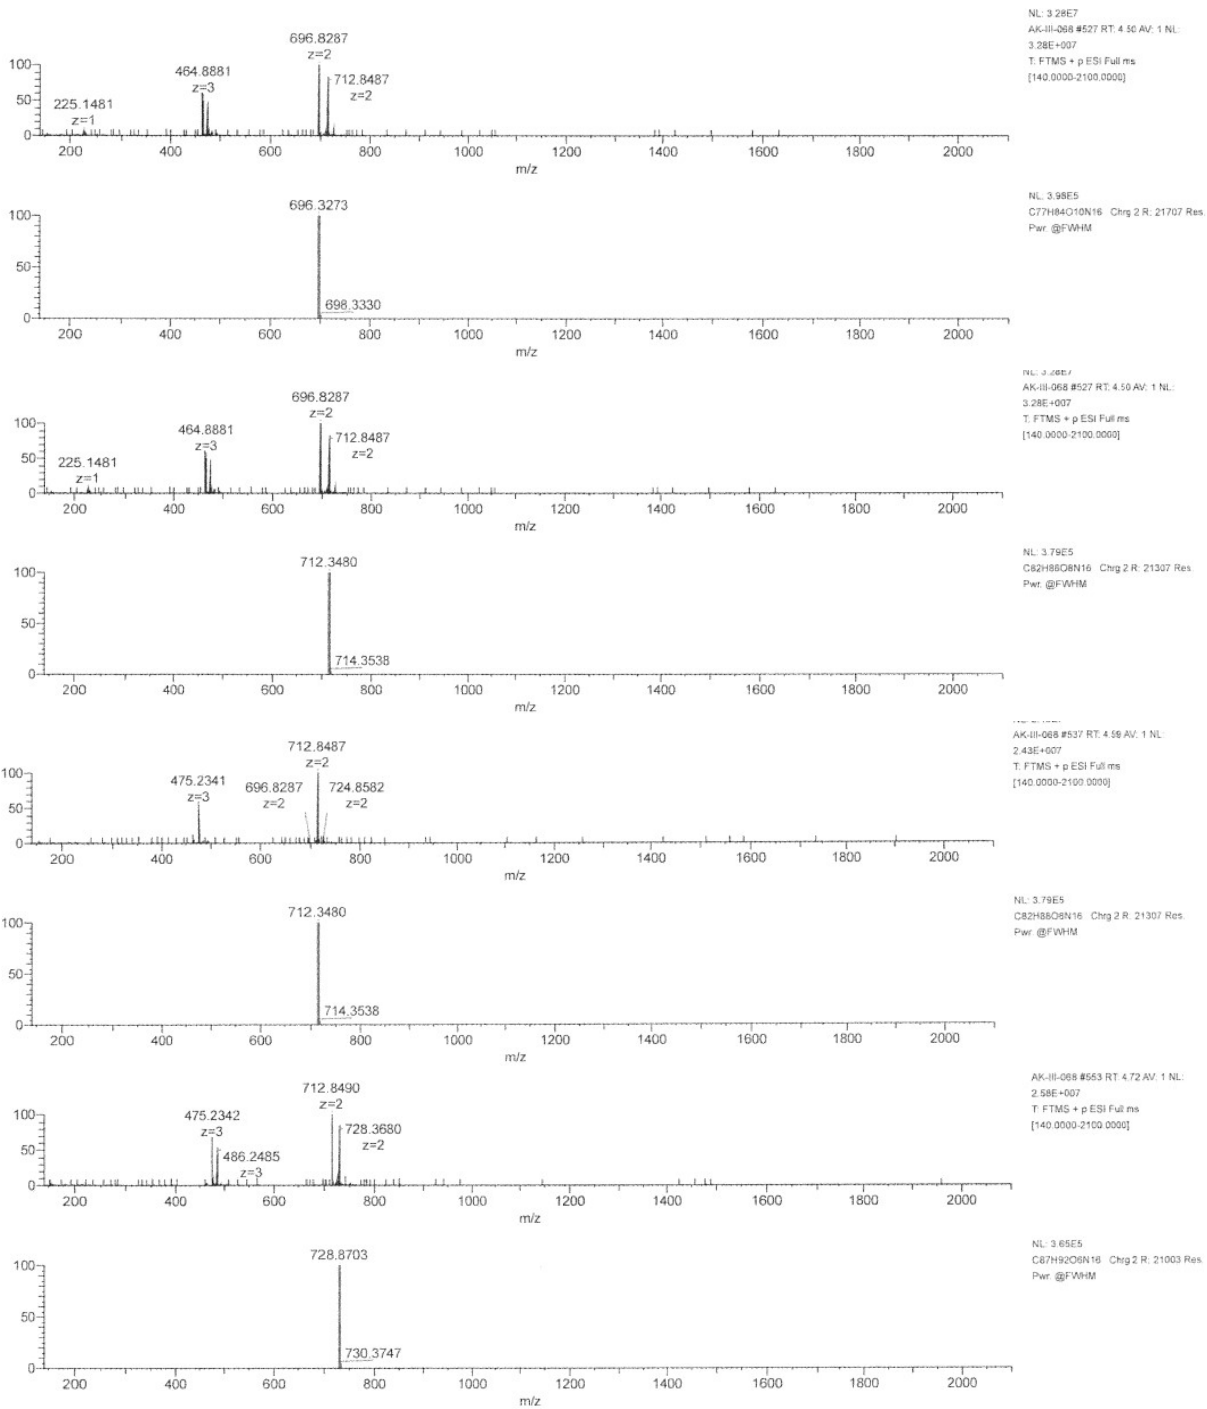

Figure S63 LCMS spectra of III-6(a,c)(2,4,6).

5.3.2- meta-arylopeptoid hexamer, III-6(a,d)(2,4,6).

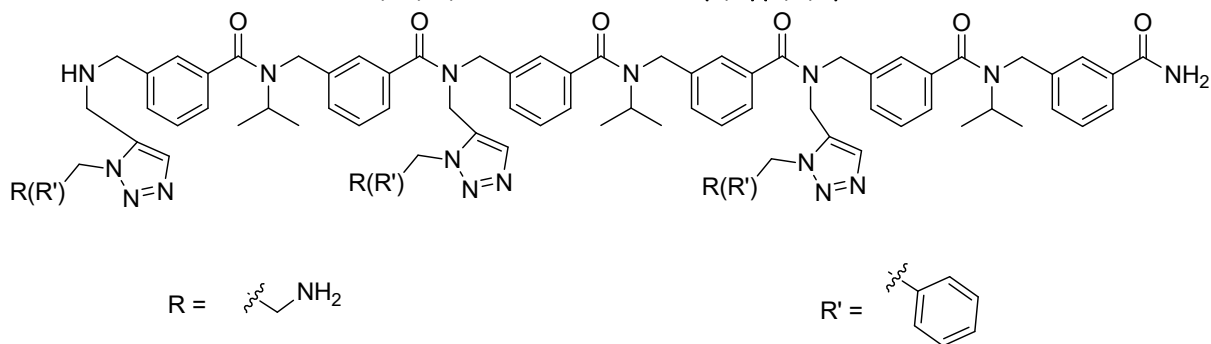

Hexamer III-6(a,d)(2,4,6) was synthesised according general procedure A then general procedure B using 50 mg of RA resin (0.031 mmol)

$m_{\text{crude}} = 58 \text{ mg}$  (purity 89%), crude yield 150%

$m_{\text{pure}} = 30 \text{ mg}$  (purity 95%), isolated yield 80%

LCMS pic at 3.13 min: HRMS (TOF MS ES+):  $m/z$  calcd for  $C_{72}H_{89}N_{19}O_6$   $[M+2H]^{2+}$ : 657.86161 found: 657.8621 (0.68 ppm).

LCMS pic at 3.29 min: HRMS (TOF MS ES+):  $m/z$  calcd for  $C_{77}H_{90}N_{18}O_6$   $[M+2H]^{2+}$ : 681.36399 found: 681.3641 (0.22 ppm).

LCMS pic at 3.76 min: HRMS (TOF MS ES+):  $m/z$  calcd for  $C_{82}H_{91}N_{17}O_6$   $[M+2H]^{2+}$ : 704.86636 found: 704.8671 (1 ppm)

LCMS pic at 3.76 min: HRMS (TOF MS ES+):  $m/z$  calcd for  $C_{82}H_{91}N_{17}O_6$   $[M+2H]^{2+}$ : 704.86636 found: 704.8671 (1 ppm)

LCMS pic at 4.09 min: HRMS (TOF MS ES+):  $m/z$  calcd for  $C_{82}H_{91}N_{17}O_6$   $[M+2H]^{2+}$ : 704.86636 found: 704.8668 (0.56 ppm)

LCMS pic at 4.66 min: HRMS (TOF MS ES+):  $m/z$   $C_{87}H_{92}N_{16}O_6$   $[M+2H]^{2+}$ : 728.36874 found: 728.3690 (0.3 ppm)

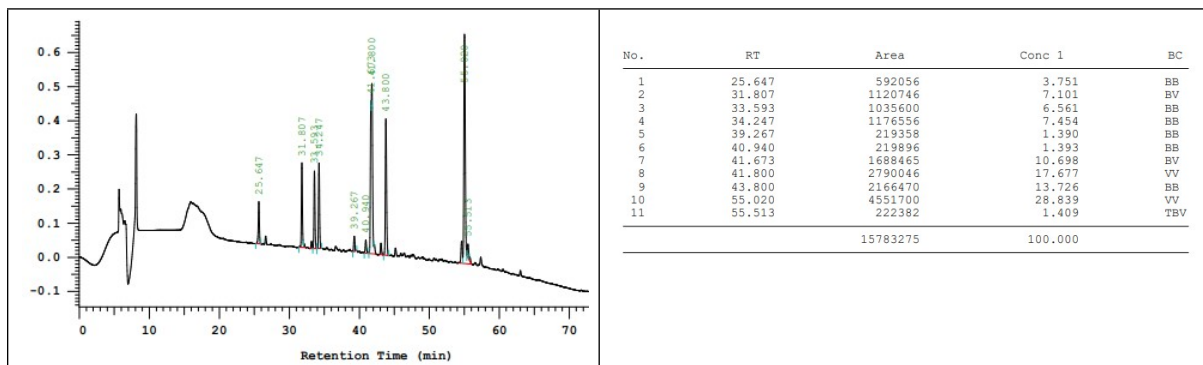

Figure S64 HPLC chromatogram of purified III-6(a,d)(2,4,6).

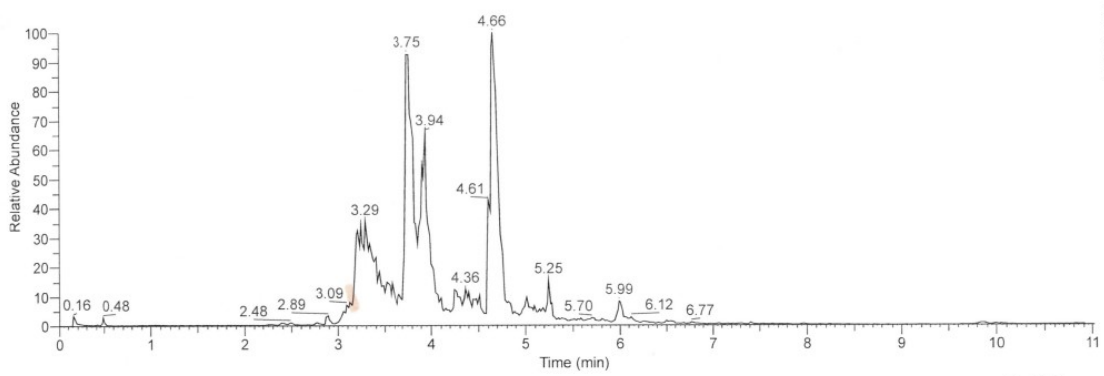

NL: 2.80E9  
 TIC MS F: FTMS  
 + p ESI Full ms  
 [140.00-2100.00]  
 AK-III-095

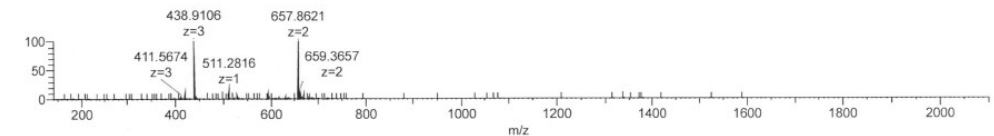

NL: 2.74E7  
 AK-III-095 #367 RT: 3.13 AV: 1 NL:  
 2.74E+007  
 T: FTMS + p ESI Full ms  
 [140.0000-2100.0000]

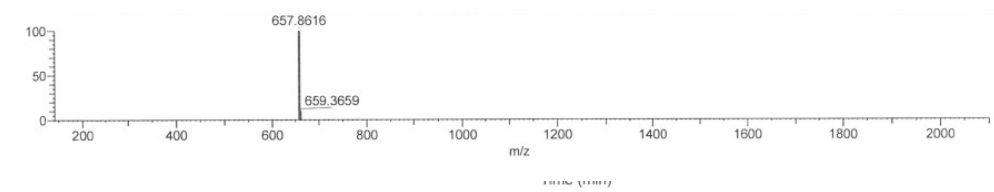

NL: 4.19E5  
 C72H89O6N19 Chrg 2 R: 22207 Res.  
 Pwr: @FWHM

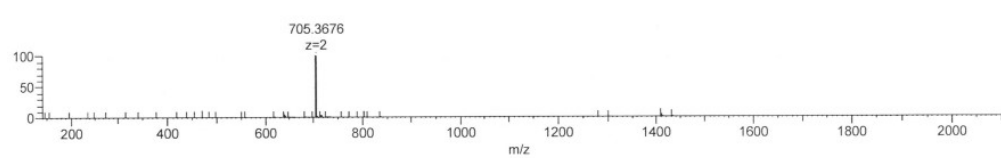

NL: 8.07E8  
 AK-III-095 #445 RT: 3.76 AV: 1 NL:  
 8.07E+008  
 T: FTMS + p ESI Full ms  
 [140.0000-2100.0000]

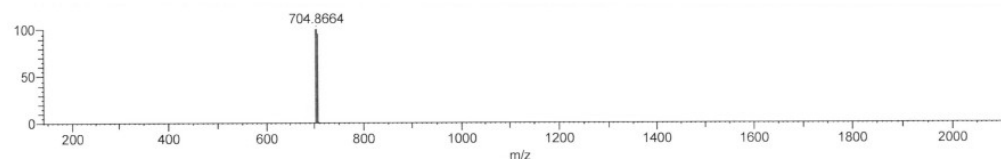

NL: 3.79E5  
 C82H91O6N17 Chrg 2 R: 21507 Res.  
 Pwr: @FWHM

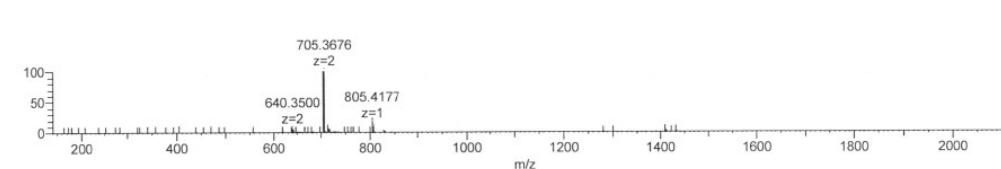

NL: 3.80E8  
 AK-III-095 #465 RT: 3.92 AV: 1 NL:  
 3.80E+008  
 T: FTMS + p ESI Full ms  
 [140.0000-2100.0000]

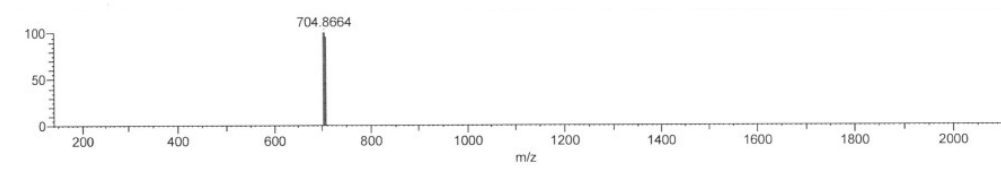

NL: 3.79E5  
 C82H91O6N17 Chrg 2 R: 21507 Res.  
 Pwr: @FWHM

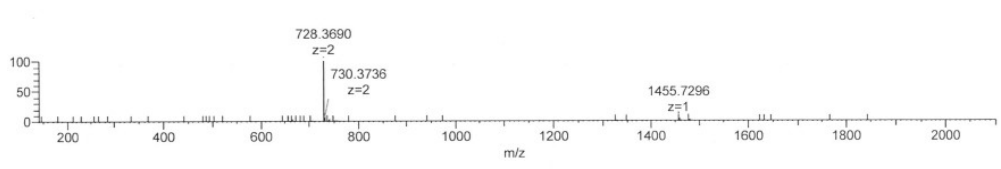

NL: 8.83E8  
 AK-III-095 #555 RT: 4.66 AV: 1 NL:  
 8.83E+008  
 T: FTMS + p ESI Full ms  
 [140.0000-2100.0000]

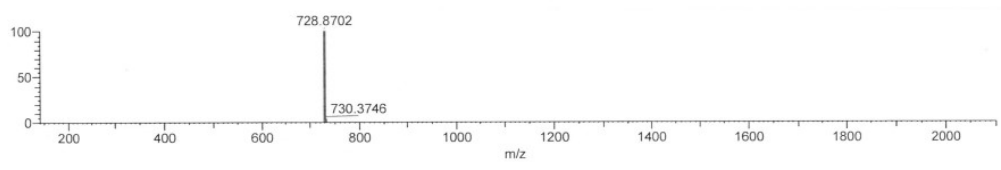

NL: 3.65E5  
 C87H92O6N16 Chrg 2 R: 21107 Res.  
 Pwr: @FWHM

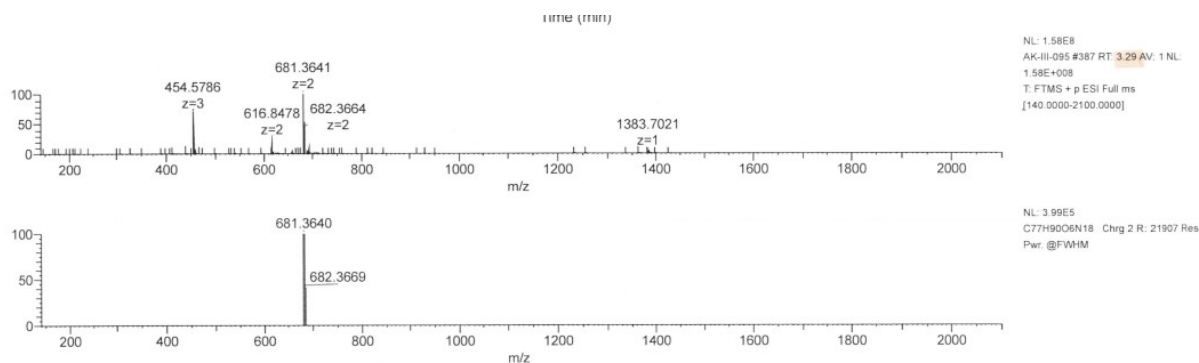

Figure S65 LCMS spectra of **III-6(a,d)(2,4,6)**.

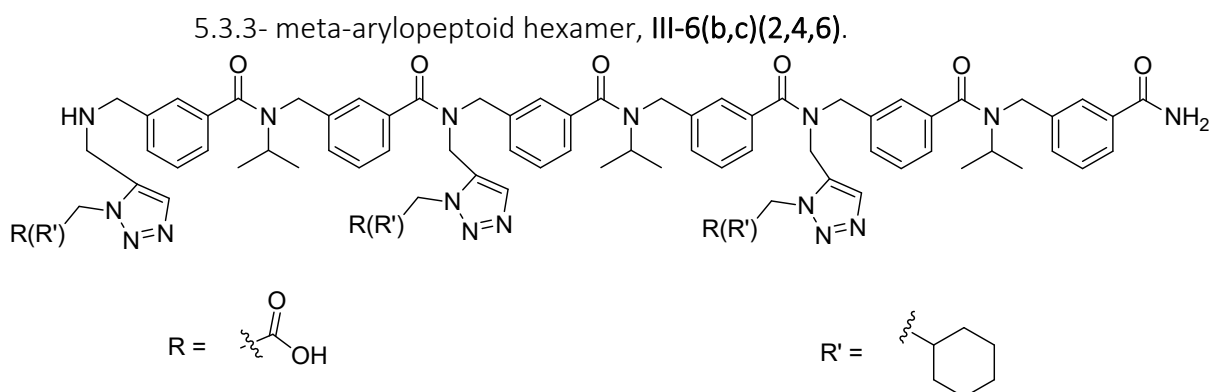

Hexamer **III-6(b,c)(2,4,6)** was synthesised according general procedure A then general procedure B using 100 mg of RA resin (0.054 mmol)

$m_{\text{crude}} = 112$  mg (purity 80%), crude yield 137%

$m_{\text{pure}} = 62$  mg (purity 88%) isolated yield 82%

LCMS pic at 4.12 min: HRMS (TOF MS ES+):  $m/z$  calcd for  $C_{72}H_{80}N_{16}O_{12}$   $[M+2H]^{2+}$ : 680.30653 found: 680.3065 (-0.11 ppm).

LCMS pic at 4.46 min: HRMS (TOF MS ES+):  $m/z$  calcd for  $C_{77}H_{90}N_{16}O_{10}$   $[M+2H]^{2+}$ : 699.35074 found: 699.3507 (-0.05 ppm)

LCMS pic at 4.63 min: HRMS (TOF MS ES+):  $m/z$  calcd for  $C_{77}H_{90}N_{16}O_{10}$   $[M+2H]^{2+}$ : 699.35074 found: 699.3507 (-0.05 ppm)

LCMS pic at 4.73 min: HRMS (TOF MS ES+):  $m/z$  calcd for  $C_{77}H_{90}N_{16}O_{10}$   $[M+2H]^{2+}$ : 699.35074 found: 699.3508 (0.05 ppm)

LCMS pic at 4.85 min: HRMS (TOF MS ES+):  $m/z$  calcd for  $C_{82}H_{100}N_{16}O_8$   $[M+2H]^{2+}$ : 718.39495 found: 718.3951 (0.18 ppm)

LCMS pic at 4.94 min: HRMS (TOF MS ES+):  $m/z$  calcd for  $C_{82}H_{100}N_{16}O_8$   $[M+2H]^{2+}$ : 718.39495 found: 718.395 (0.01 ppm)

LCMS pic at 5.12 min: HRMS (TOF MS ES+):  $m/z$  calcd for  $C_{82}H_{100}N_{16}O_8$   $[M+2H]^{2+}$ : 718.39495 found: 718.395 (0.09 ppm)

LCMS pic at 5.24 min: HRMS (TOF MS ES+):  $m/z$  calcd for  $C_{87}H_{110}N_{16}O_6$   $[M+2H]^{2+}$ : 737.43916 found: 737.4392 (0.06 ppm)

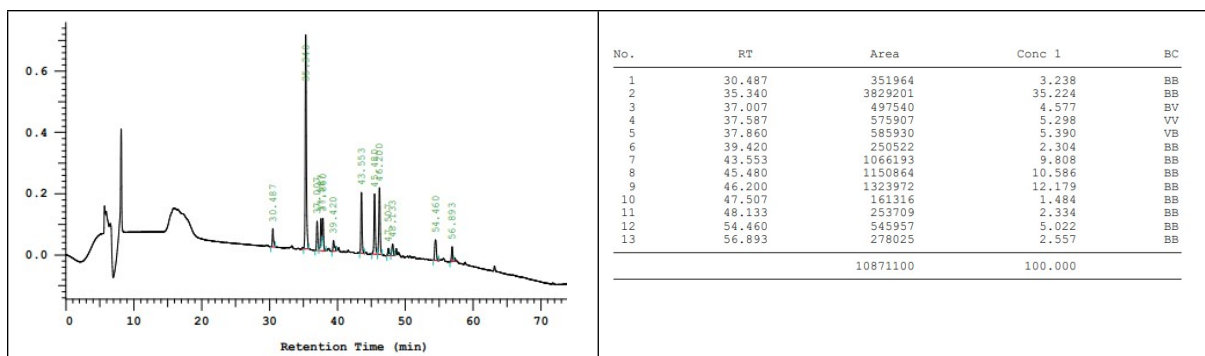

Figure S66 HPLC chromatogram of purified III-6(b,c)(2,4,6).

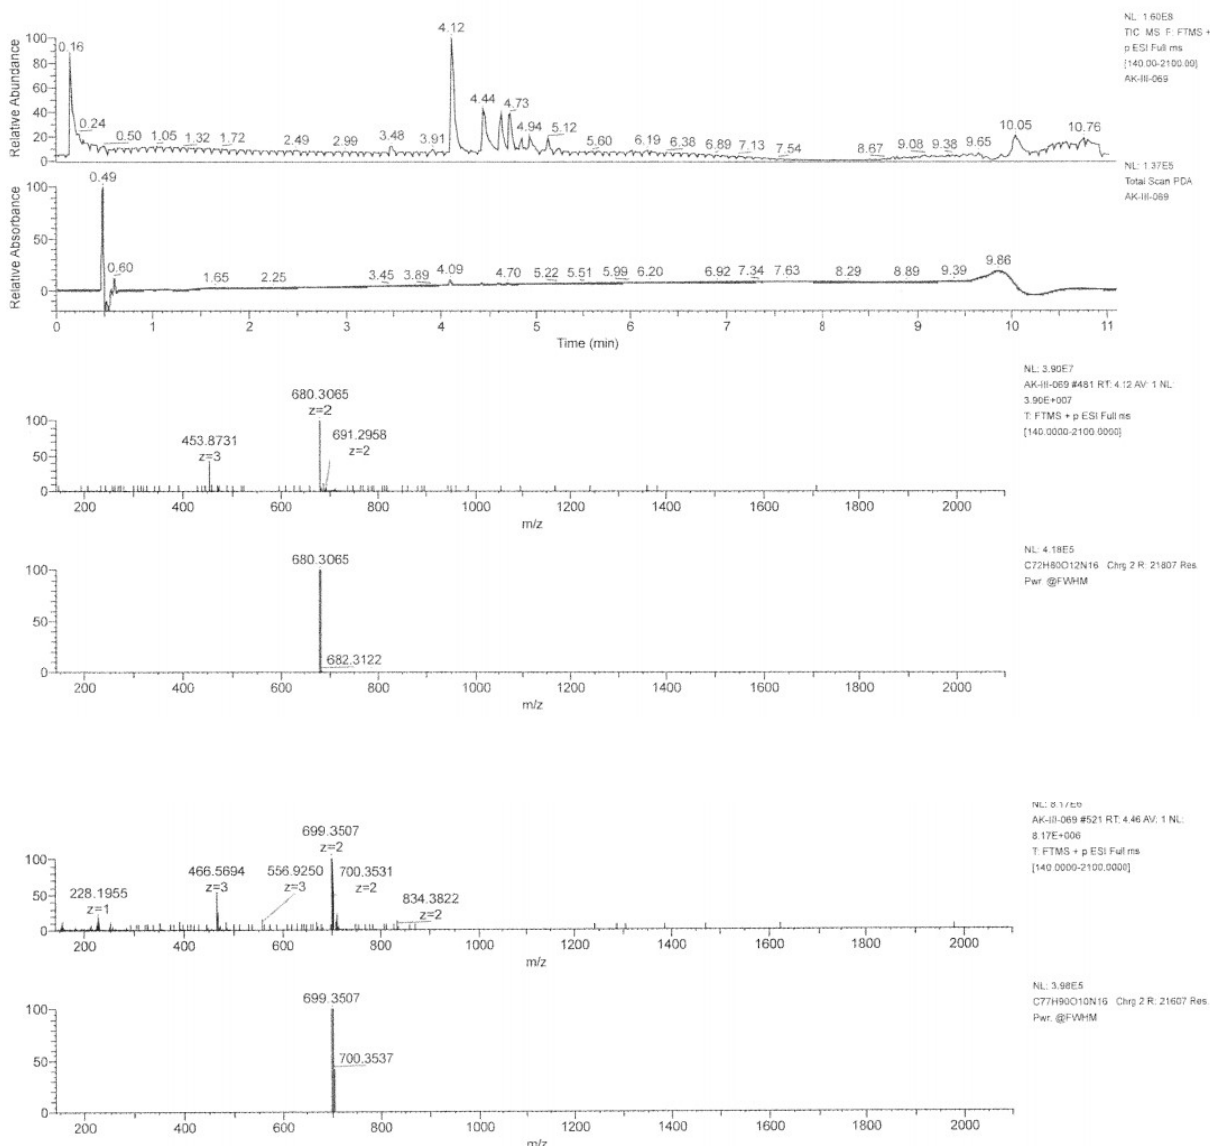



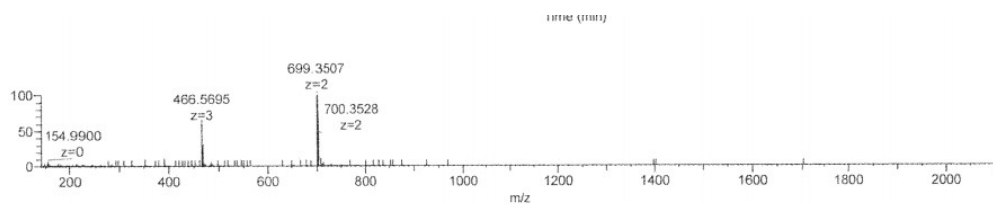

NL: 1.05E7  
AK-III-069 #541 RT: 4.63 AV: 1 NL:  
1.05E+007  
T: FTMS + p ESI Full ms  
[140.0000-2100.0000]

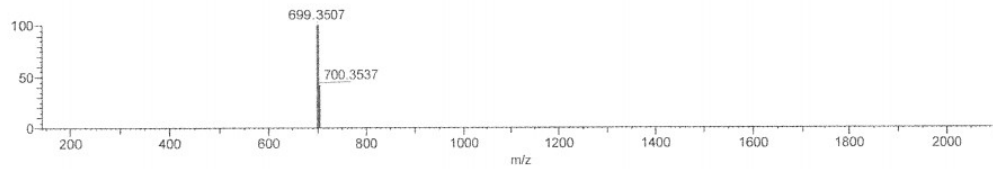

NL: 3.98E5  
C77H90O10N16 Chg 2 R: 21707 Res.  
Pwr: @FWHM

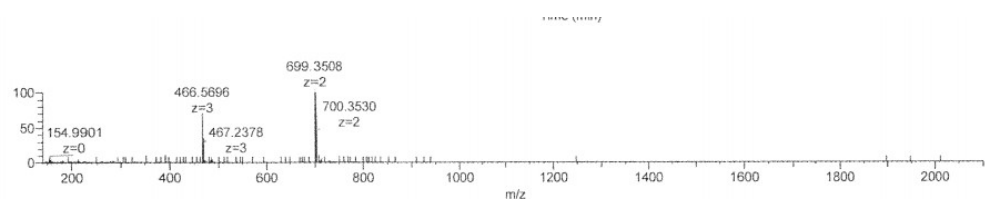

NL: 1.02E7  
AK-III-069 #553 RT: 4.73 AV: 1 NL:  
1.02E+007  
T: FTMS + p ESI Full ms  
[140.0000-2100.0000]

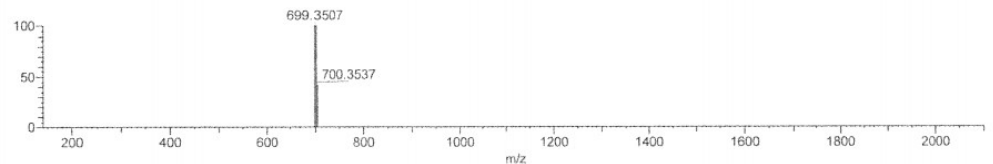

NL: 3.98E5  
C77H90O10N16 Chg 2 R: 21907 Res.  
Pwr: @FWHM

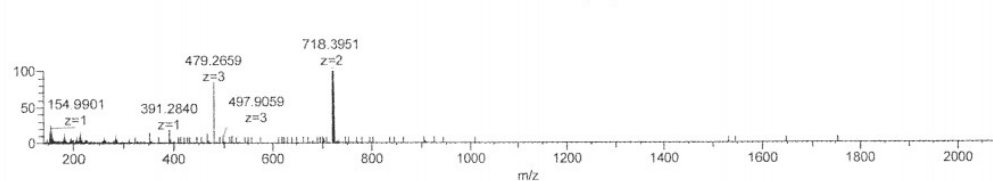

NL: 3.11E6  
AK-III-069 #567 RT: 4.85 AV: 1 NL:  
3.11E+006  
T: FTMS + p ESI Full ms  
[140.0000-2100.0000]

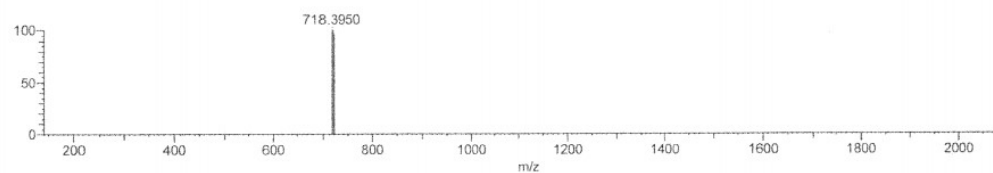

NL: 3.78E5  
C82H100O8N16 Chg 2 R: 21307 Res.  
Pwr: @FWHM

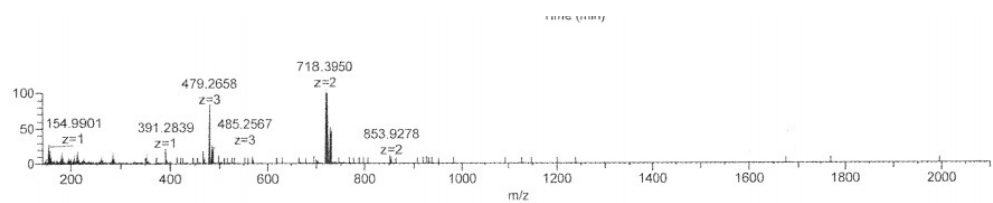

NL: 2.58E6  
AK-III-069 #577 RT: 4.94 AV: 1 NL:  
2.58E+006  
T: FTMS + p ESI Full ms  
[140.0000-2100.0000]

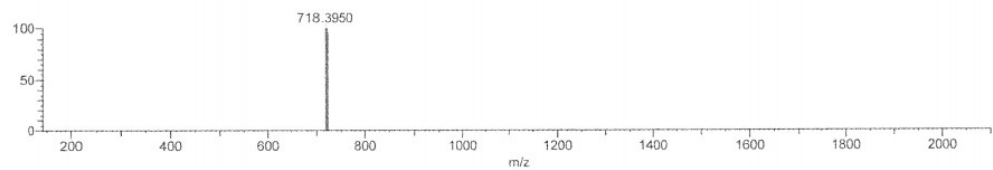

NL: 3.78E5  
C82H100O8N16 Chg 2 R: 21307 Res.  
Pwr: @FWHM

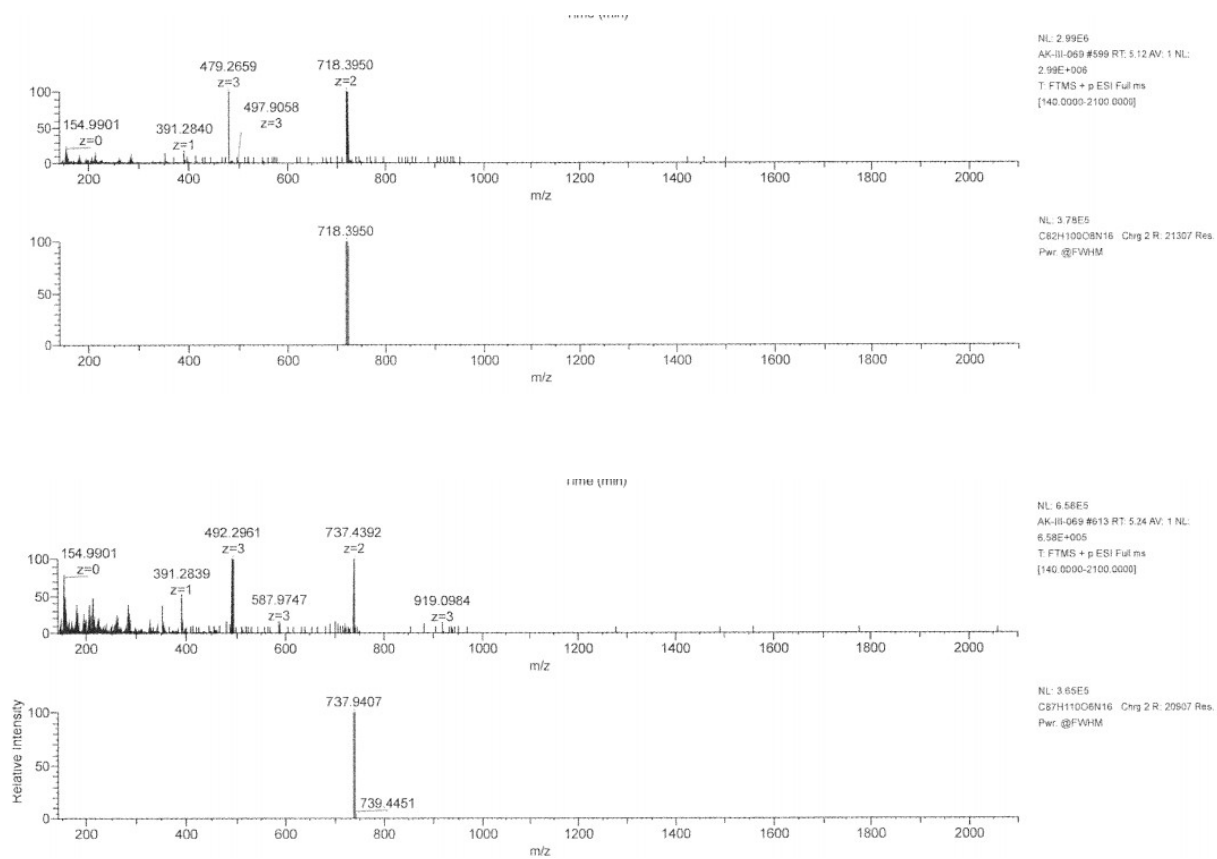

Figure S67 LCMS spectra of III-6(b,c)(2,4,6).

5.3.3- meta-arylopeptoid hexamer, III-6(b,d)(2,4,6).

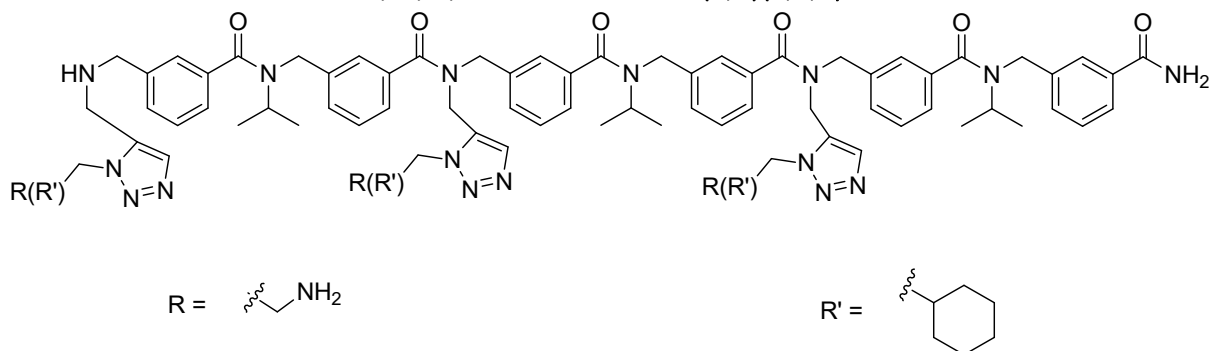

Hexamer III-6(b,d)(2,4,6) was synthesised according general procedure A then general procedure B using 100 mg of RA resin (0.054 mmol)

$m_{\text{crude}} = 74$  mg (purity 81%), crude yield 88%

$m_{\text{pure}} = 62$  mg (purity 96%), isolated yield 82%

LCMS pic at 3.64 min: HRMS (TOF MS ES+):  $m/z$  calcd for  $C_{72}H_{90}N_{19}O_6$   $[M+3H]^{3+}$ : 438.91017 found: 438.9103 (0.39 ppm)

LCMS pic at 3.8 min: HRMS (TOF MS ES+):  $m/z$  calcd for  $C_{77}H_{97}N_{18}O_6$   $[M+3H]^{3+}$ : 456.59407 found: 456.5945 (1.04 ppm)

LCMS pic at 4.26 min: HRMS (TOF MS ES+):  $m/z$  calcd for  $C_{82}H_{103}N_{17}O_6$   $[M+2H]^{2+}$ : 710.91331 found: 710.9135 (0.2 ppm)

LCMS pic at 4.51 min: HRMS (TOF MS ES+):  $m/z$  calcd for  $C_{82}H_{103}N_{17}O_6$   $[M+2H]^{2+}$ : 710.91331 found: 710.9135 (0.2 ppm)

LCMS pic at 4.09 min: HRMS (TOF MS ES+):  $m/z$  calcd for  $C_{82}H_{91}N_{17}O_6$   $[M+2H]^{2+}$ : 704.86636 found: 704.8668 (0.56 ppm)

LCMS pic at 4.66 min: HRMS (TOF MS ES+):  $m/z$  calcd for  $C_{87}H_{110}N_{16}O_6$   $[M+2H]^{2+}$ : 737.43916 found: 737.4396 (0.64 ppm)

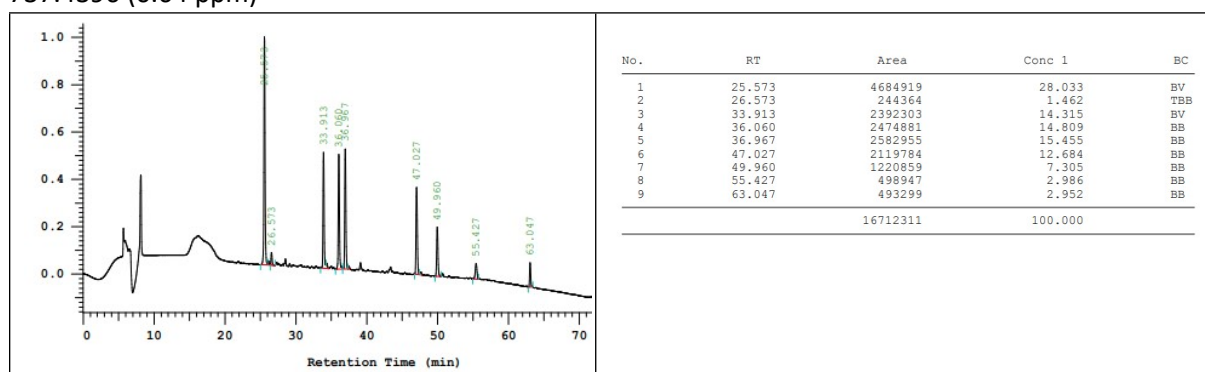

Figure S68 HPLC chromatogram of purified III-6(b,d)(2,4,6)

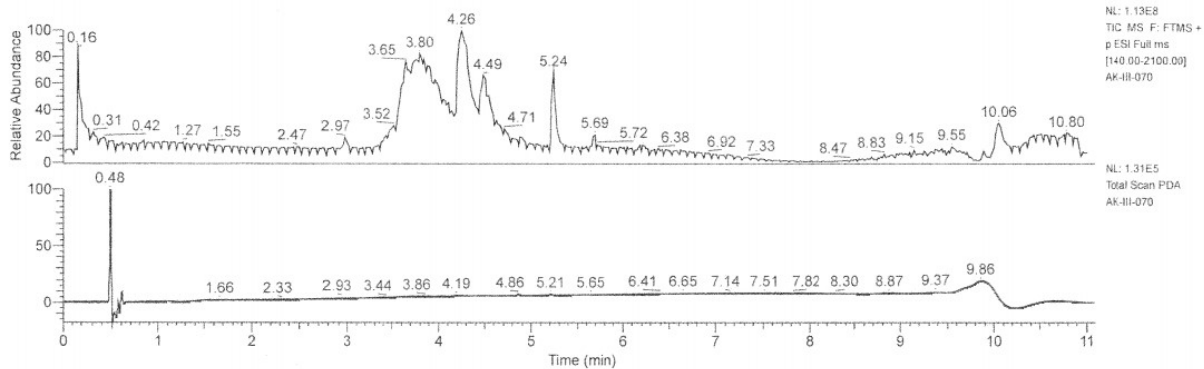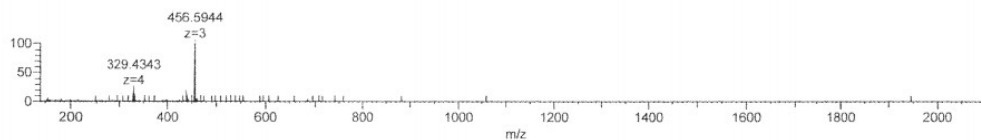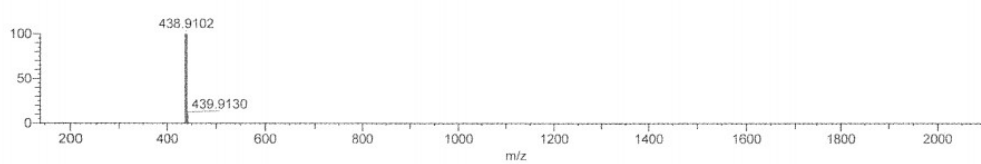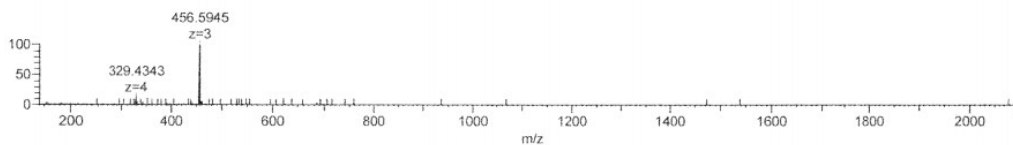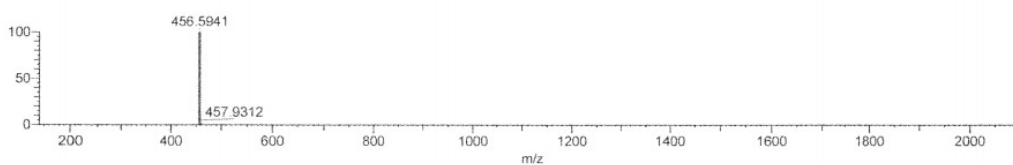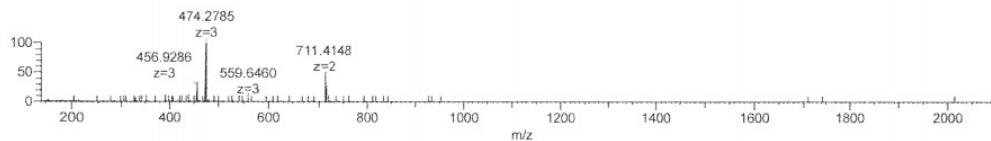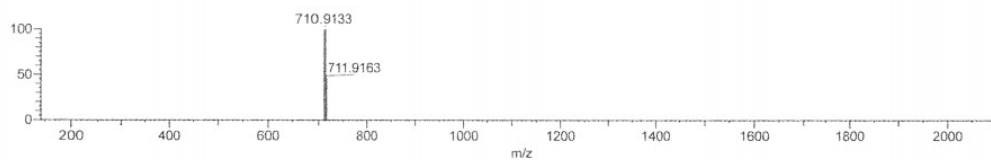

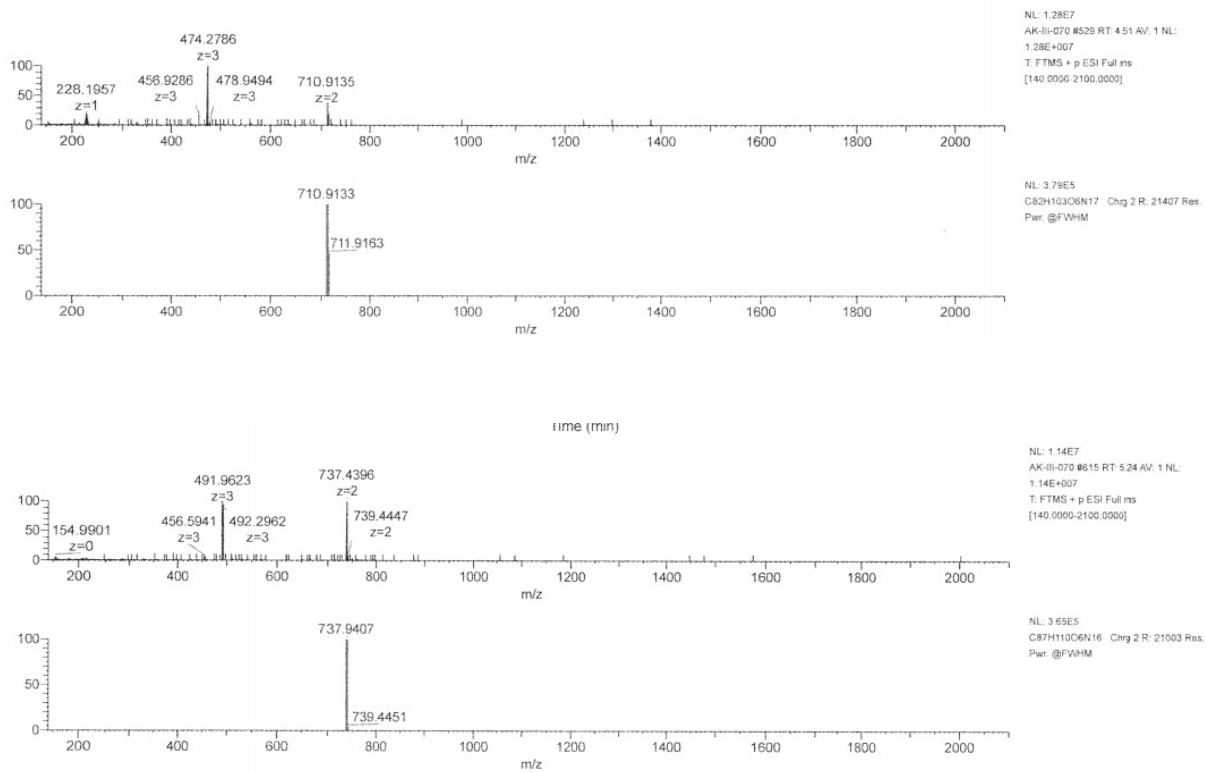

Figure S69 LCMS spectra of III-6(b,d)(2,4,6).

5.3.4- meta-arylopeptoid hexamer, III-6(c,d)(2,4,6).

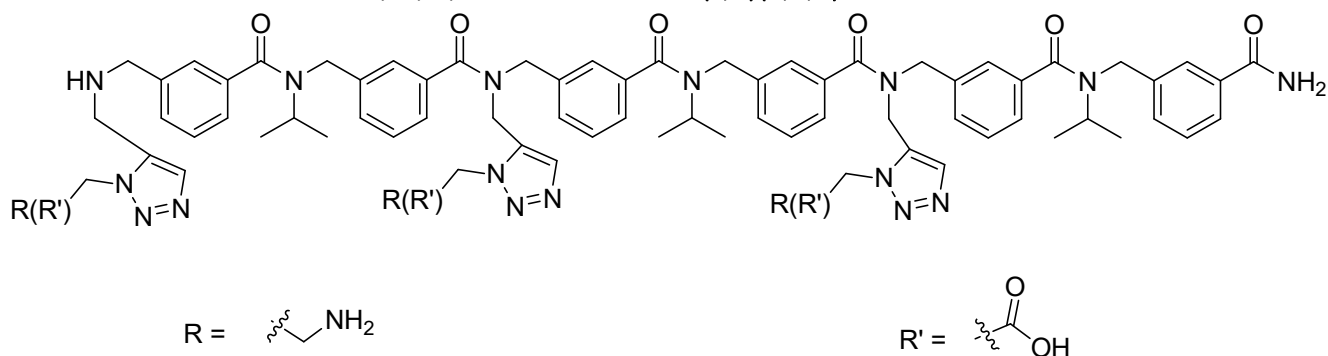

Hexamer III-6(c,d)(2,4,6) was synthesised according general procedure A then general procedure B using 50 mg of RA resin (0.031 mmol)

$m_{\text{crude}} = 46 \text{ mg}$  (purity 86%), crude yield 110%

$m_{\text{pure}} = 33.8 \text{ mg}$  (purity 97.8%), isolated yield 81%

LCMS pic at 3.29 min: HRMS (TOF MS ES<sup>+</sup>):  $m/z$  calcd for C<sub>72</sub>H<sub>87</sub>N<sub>18</sub>O<sub>8</sub> [M+3H]<sup>3+</sup>: 443.89793 found: 443.8988 (1.97 ppm).

LCMS pic at 3.19 min: HRMS (TOF MS ES<sup>+</sup>):  $m/z$  calcd for C<sub>72</sub>H<sub>87</sub>N<sub>18</sub>O<sub>8</sub> [M+3H]<sup>3+</sup>: 443.89793; found: 443.8989 (-2.11 ppm).

LCMS pic at 3.56 min: HRMS (TOF MS ES<sup>+</sup>):  $m/z$  calcd C<sub>72</sub>H<sub>83</sub>N<sub>17</sub>O<sub>10</sub> [M+2H]<sup>2+</sup>: 672.82489; found: 672.8253 (0.63 ppm).

LCMS pic at 4.13 min: HRMS (TOF MS ES<sup>+</sup>):  $m/z$  C<sub>72</sub>H<sub>80</sub>N<sub>16</sub>O<sub>12</sub> [M+2H]<sup>2+</sup>: 680.30653; found: 680.3075 (1.42 ppm).

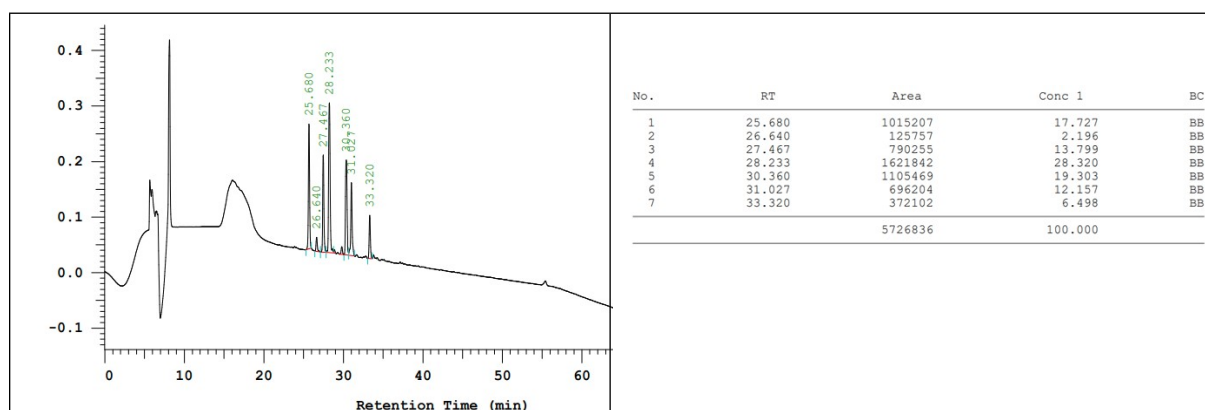

Figure S70 HPLC chromatogram of purified III-6(c,d)(2,4,6).

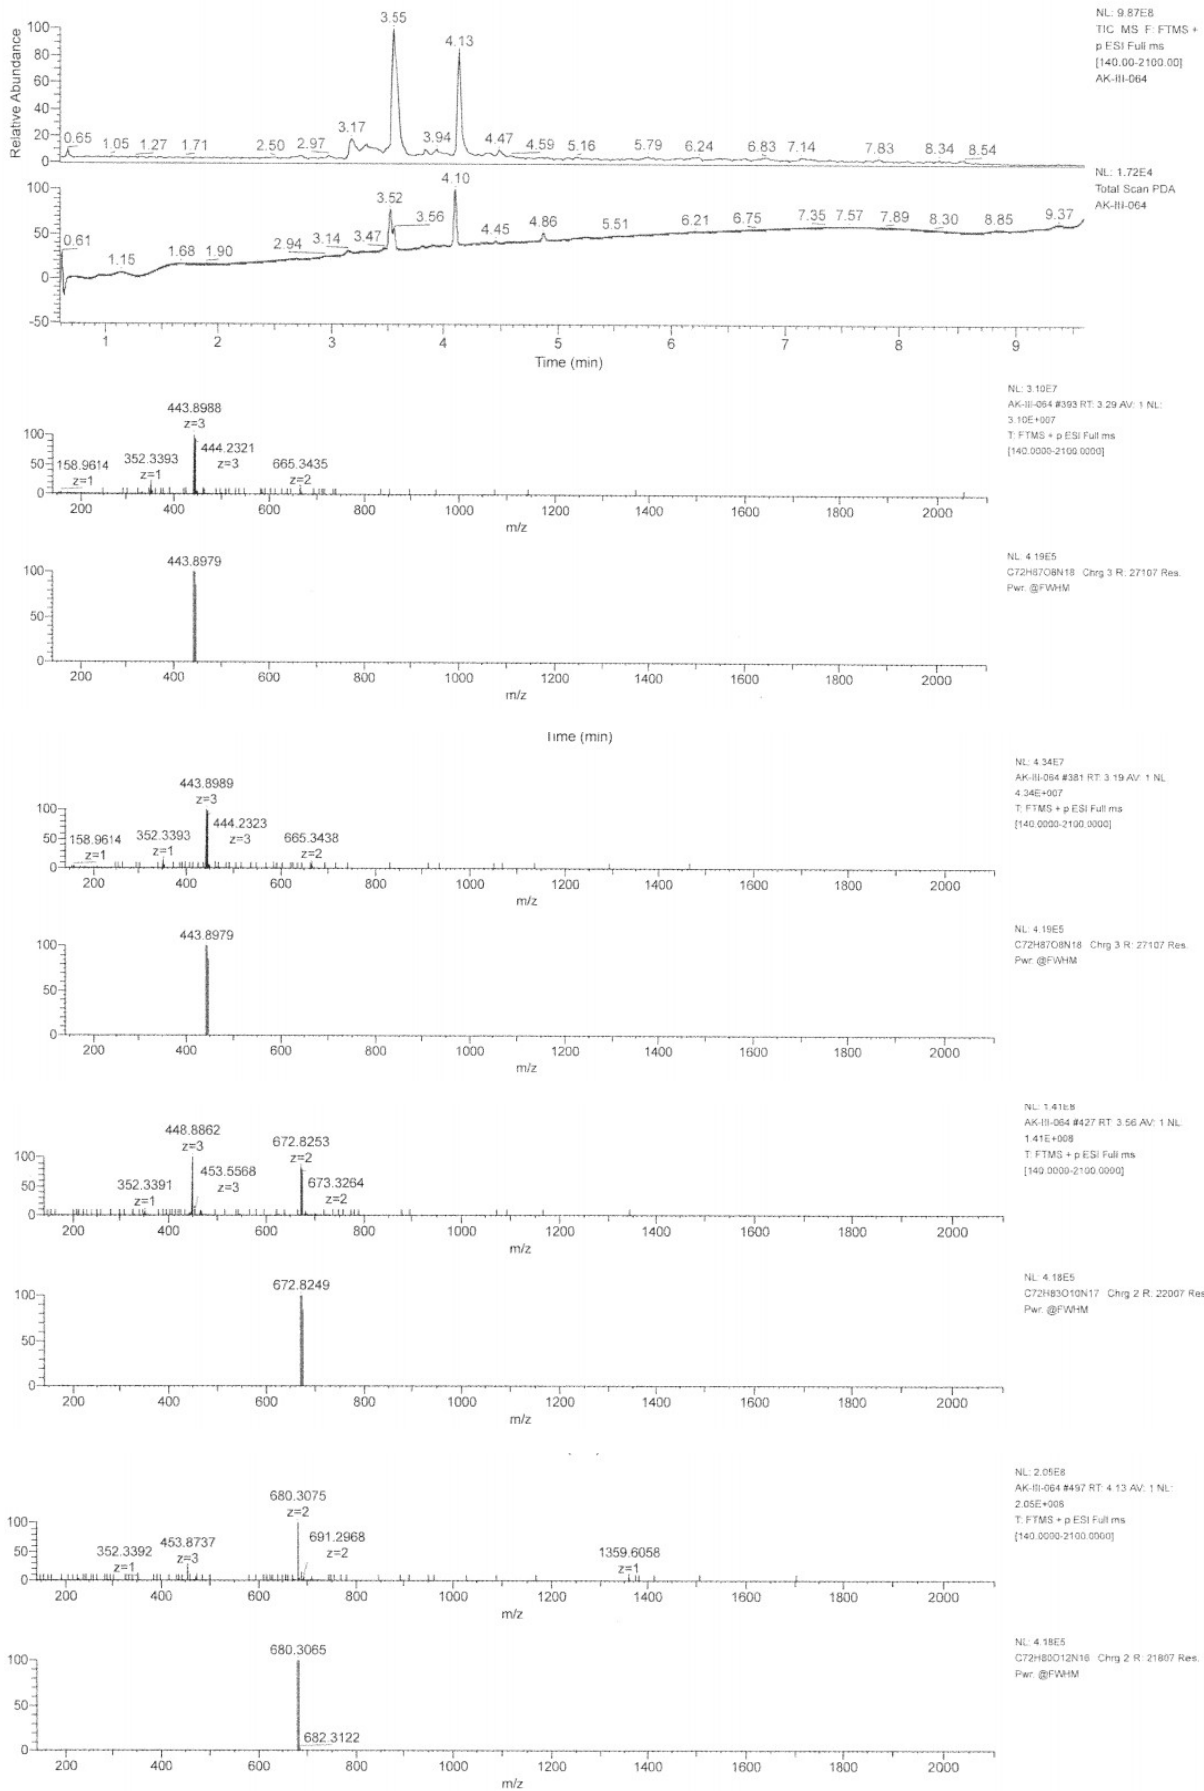

Figure S71 LCMS spectra of III-6(c,d)(2,4,6).

5.3.5- Meta-arylopeptoid hexamer, III-6(d,e)(2,4,6).

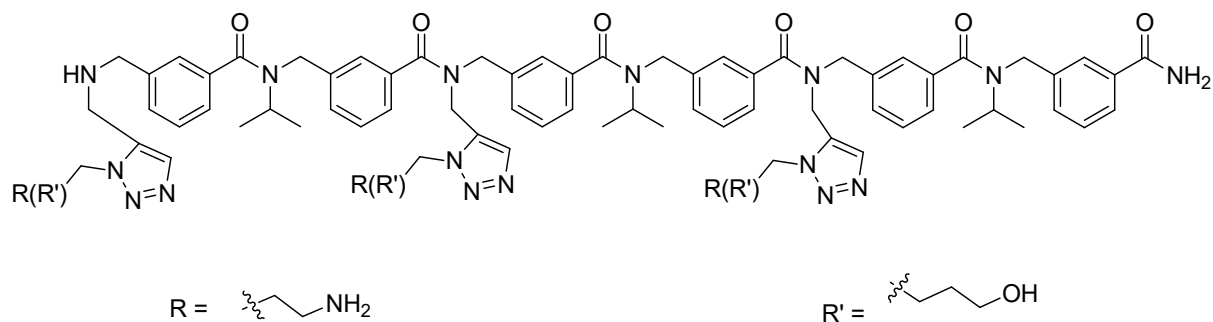

Hexamer III-6(d,e)(2,4,6) was synthesised according general procedure A then general procedure B using 50 mg of RA resin (0.031 mmol)

$m_{\text{crude}} = 46$  mg (purity 89%), crude yield 111%

$m_{\text{pure}} = 33.8$  mg (purity 98%), isolated yield 81%

LCMS pic at 2.77 min: HRMS (TOF MS ES+):  $m/z$  calcd for  $C_{72}H_{89}N_{16}O_6$   $[M+2H]^{2+}$ : 657.86161 found: 657.8613 (-0.52 ppm)

LCMS pic at 2.89 min: HRMS (TOF MS ES+):  $m/z$  calcd for  $C_{73}H_{90}N_{18}O_7$   $[M+2H]^{2+}$ : 665.36145 found: 665.3611 (-0.54 ppm)

LCMS pic at 3.18 min: HRMS (TOF MS ES+):  $m/z$  calcd for  $C_{74}H_{91}N_{17}O_8$   $[M+2H]^{2+}$ : 672.86128 found: 672.8617 (0.62 ppm)

LCMS pic at 3.58 min: HRMS (TOF MS ES+):  $m/z$  calcd for  $C_{75}H_{92}N_{16}O_9$   $[M+2H]^{2+}$ : 680.36111 found: 680.3611 (0.05 ppm)

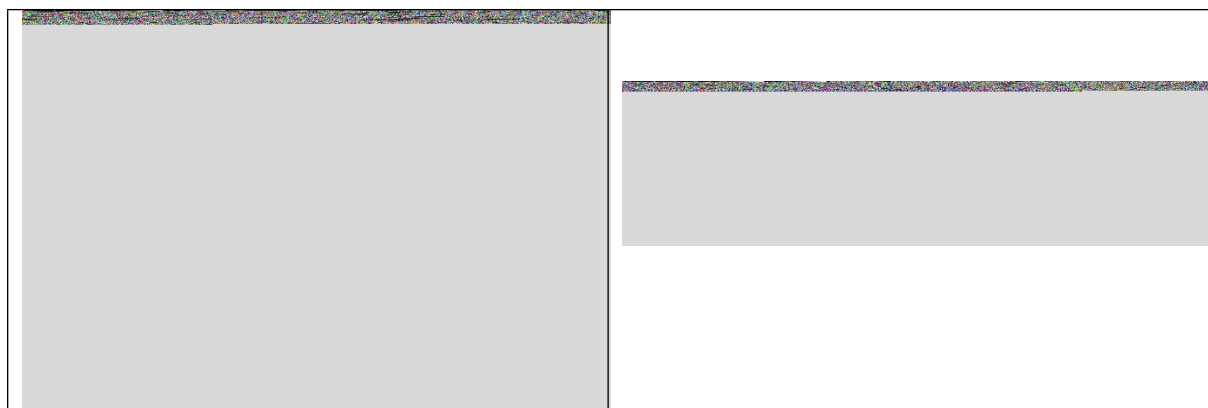

Figure S72 HPLC chromatogram of purified III-6(d,e)(2,4,6).



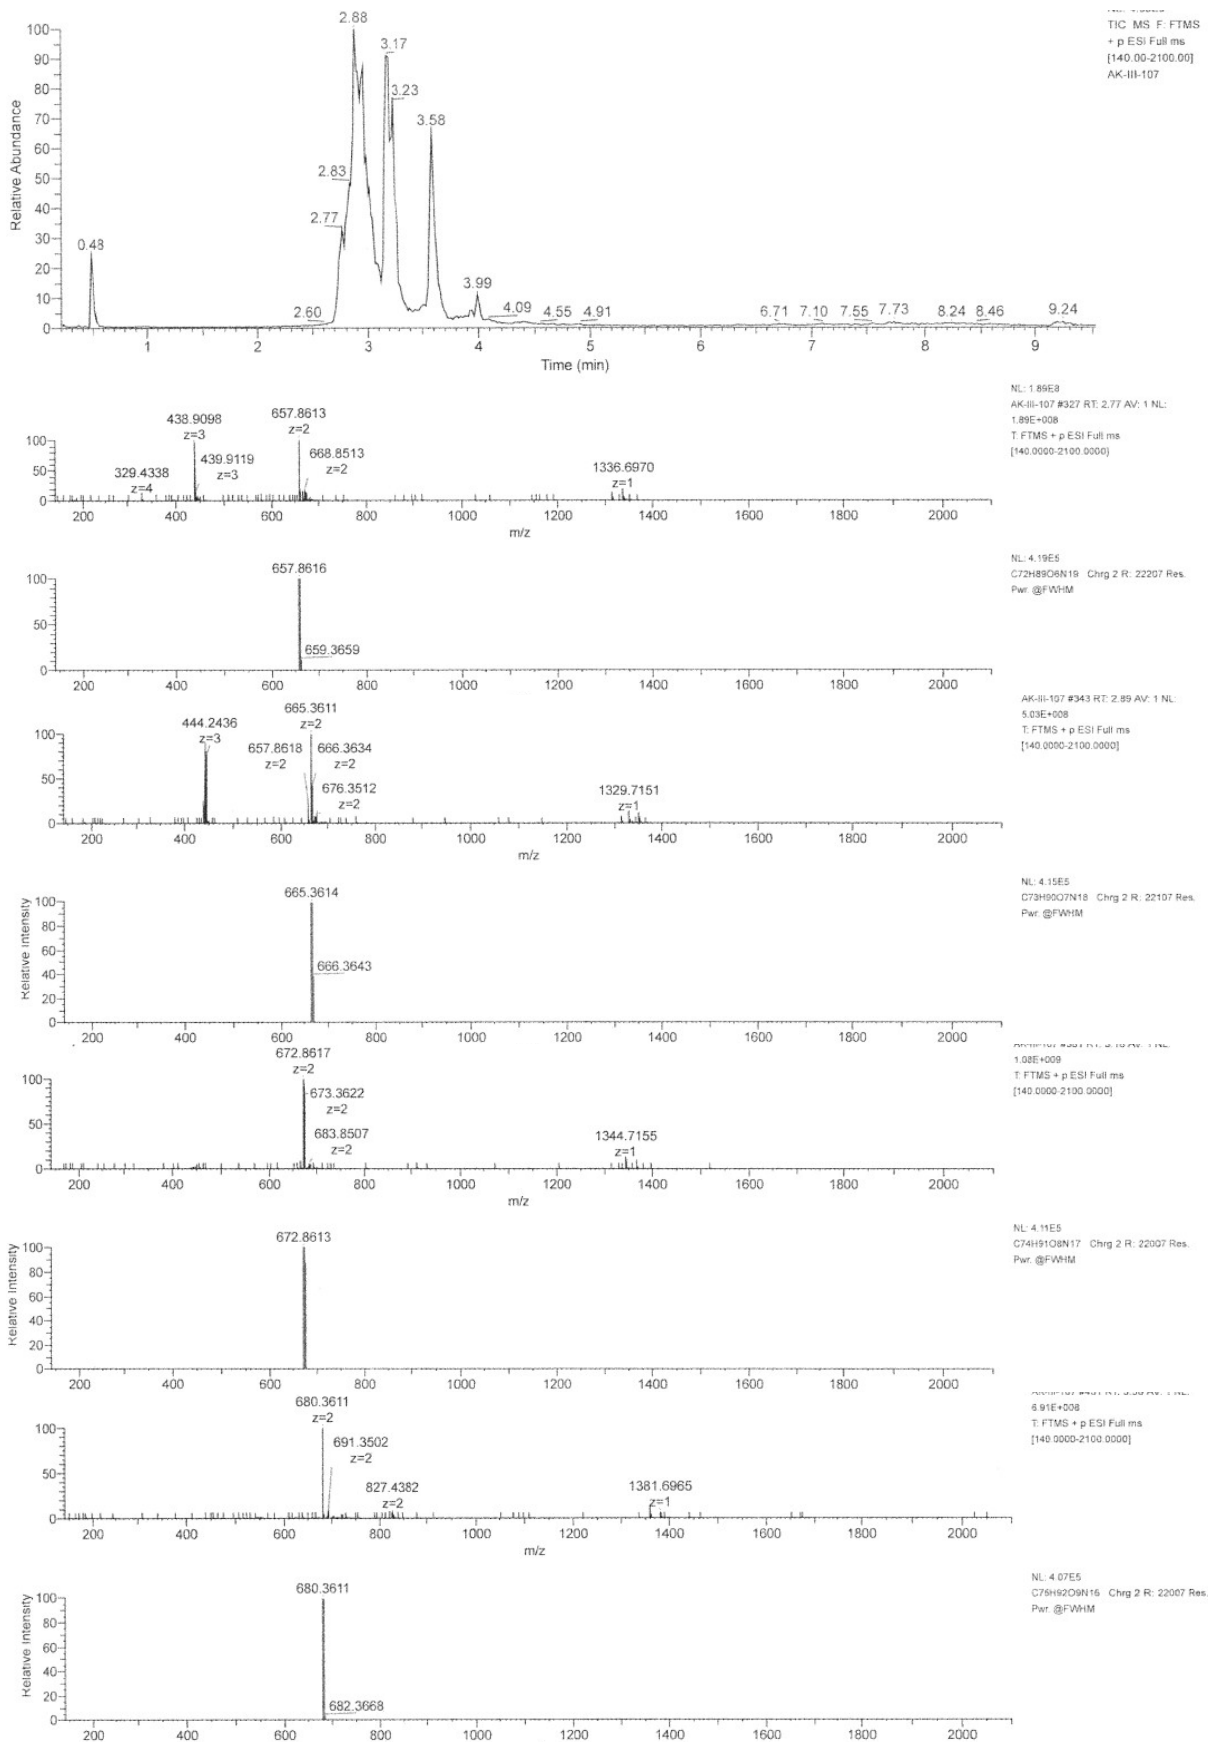

Figure S74 LCMS spectra of III-6(d,e)(2,4,6).

## 6-Sequential click to access regioisomers

### 6.1- Synthetic paths

#### 6.1.1. Synthetic path for III-6(a<sub>2</sub>,c<sub>4,6</sub>)

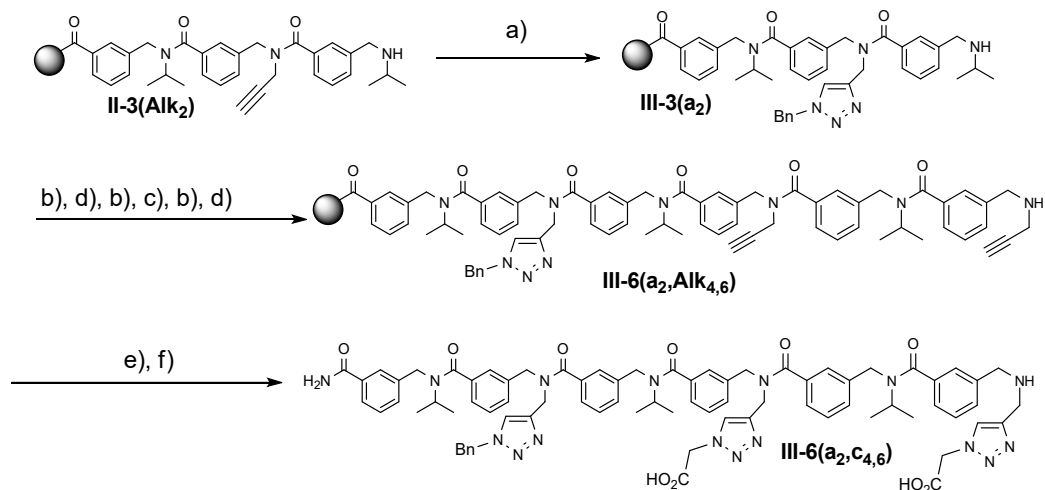

- a) DCM/MeOH ( $v/v=8/2$ ), Cata (5mol-%), **1a**, 50°C. b) 3-(chloromethyl)-benzoyl chloride, DIPEA, DCM, RT. c) *isopropyl* amine, dmsO, 50°C. d) Propargyl amine, dmsO, 50°C. e) DCM/MeOH ( $v/v=8/2$ ), Cata (5mol-%), **1c**, 50°C. f) TFA/H<sub>2</sub>O/*tri isopropyl* silane (95/2.5/2.5).

### 6.1.2. Synthetic path for III-6(a<sub>4</sub>,c<sub>2</sub>,6)

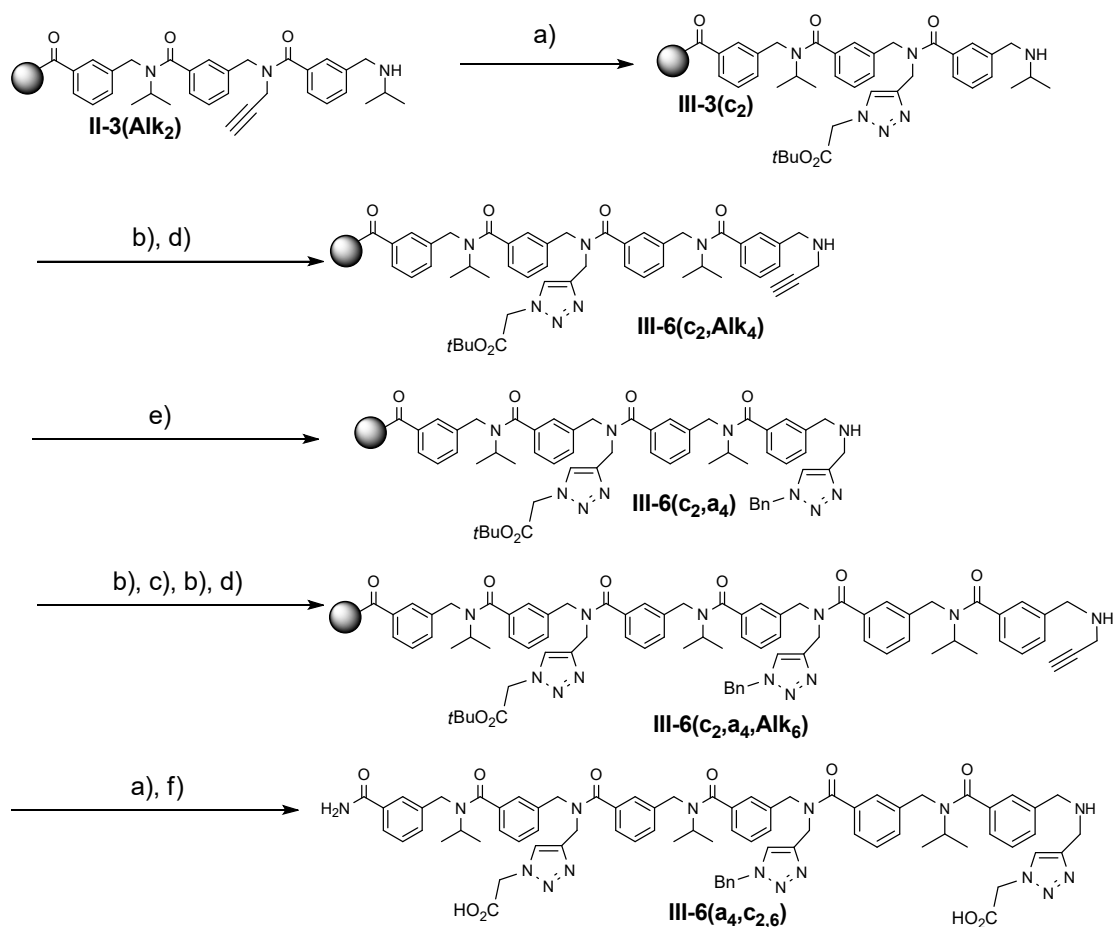

- a) DCM/MeOH (v/v=8/2), Cata (5mol-%), **1c**, 50°C. b) 3-(chloromethyl)-benzoyl chloride, DIPEA, DCM, RT. c) *i*sopropyl amine, dmso, 50°C. d) Propargyl amine, dmso, 50°C. e) DCM/MeOH (v/v=8/2), Cata (5mol-%), **1a**, 50°C. f) TFA/H<sub>2</sub>O/tri *i*sopropyl silane (95/2.5/2.5).

### 6.1.3. Synthetic path for III-6-(a<sub>6</sub>,c<sub>2,4</sub>)

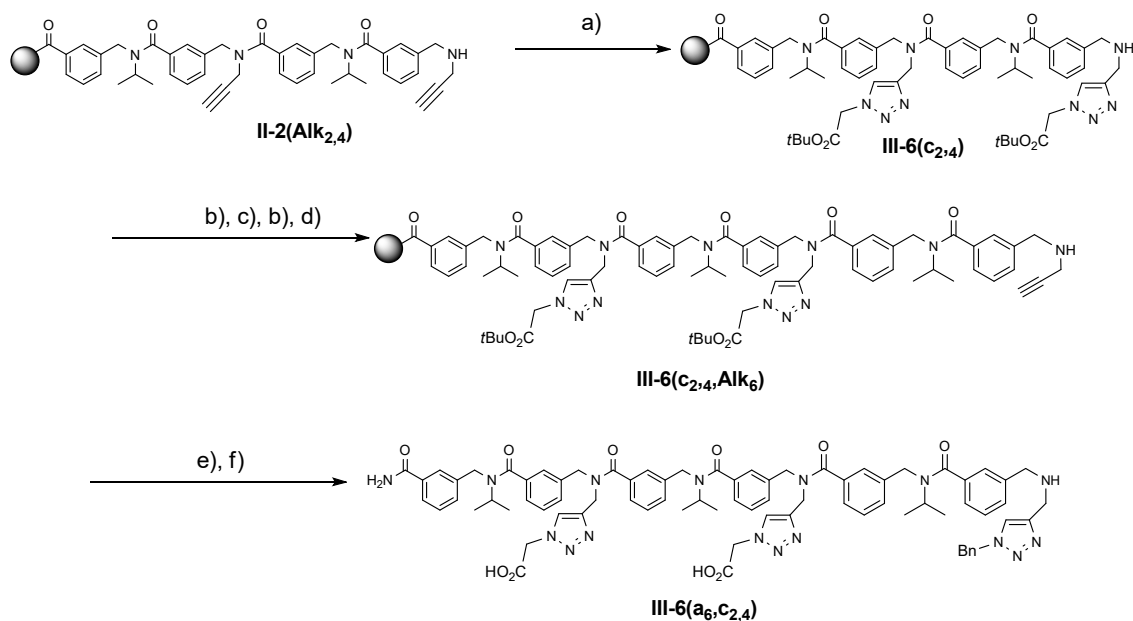

- a) DCM/MeOH ( $v/v=8/2$ ), Cata (5mol-%), **1c**, 50°C. b) 3-(chloromethyl)-benzoyl chloride, DIPEA, DCM, RT. c) *i*sopropyl amine, dmsO, 50°C. d) Propargyl amine, dmsO, 50°C. e) DCM/MeOH ( $v/v=8/2$ ), Cata (5mol-%), **1a**, 50°C. f) TFA/H<sub>2</sub>O/*tri isopropyl silane* (95/2.5/2.5).

### 6.1.4. Synthetic path for III-6-(a<sub>2,4</sub>,c<sub>6</sub>)

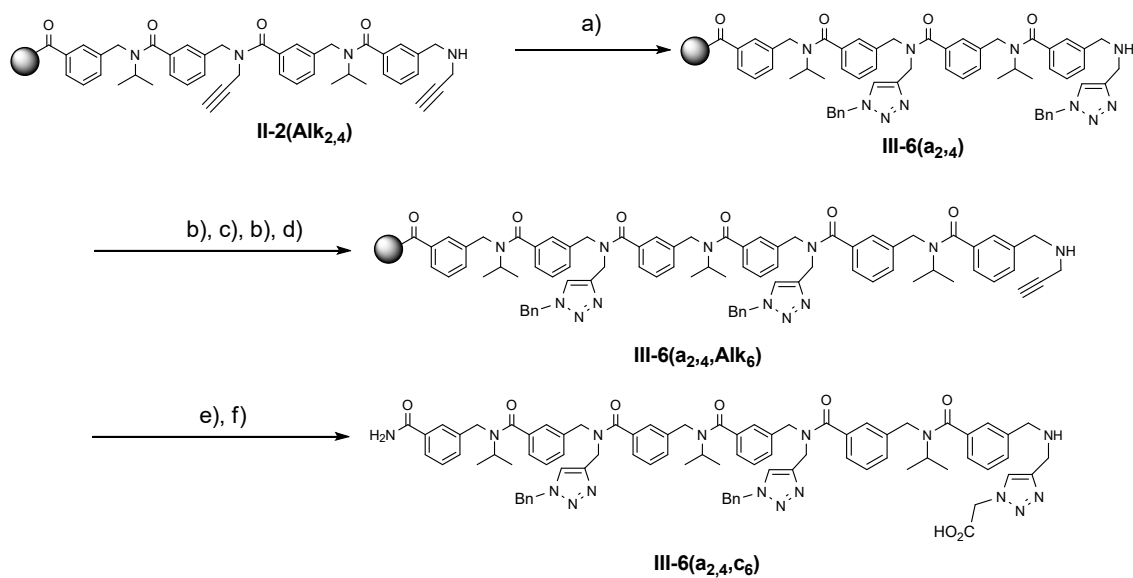

a) DCM/MeOH ( $v/v=8/2$ ), Cata (5mol-%), **1a**, 50°C. b) 3-(chloromethyl)-benzoyl chloride, DIPEA, DCM, RT. c) *isopropyl* amine, dmsO, 50°C. d) Propargyl amine, dmsO, 50°C. e) DCM/MeOH ( $v/v=8/2$ ), Cata (5mol-%), **1c**, 50°C. f) TFA/H<sub>2</sub>O/*tri isopropyl* silane (95/2.5/2.5).

### 6.1.5- Synthetic path for III-6(a<sub>4,6</sub>,c<sub>2</sub>)

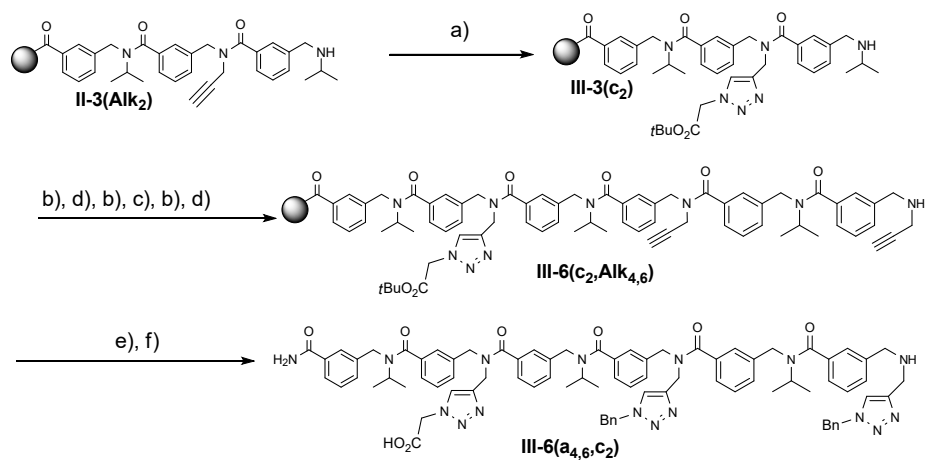

a) DCM/MeOH ( $v/v=8/2$ ), Cata (5mol-%), **1c**, 50°C. b) 3-(chloromethyl)-benzoyl chloride, DIPEA, DCM, RT. c) *isopropyl* amine, dmsO, 50°C. d) Propargyl amine, dmsO, 50°C. e) DCM/MeOH ( $v/v=8/2$ ), Cata (5mol-%), **1a**, 50°C. f) TFA/H<sub>2</sub>O/*tri isopropyl silane* (95/2.5/2.5).

### 6.1.6. Synthetic path for III-6-(a<sub>2</sub>,c<sub>4</sub>)

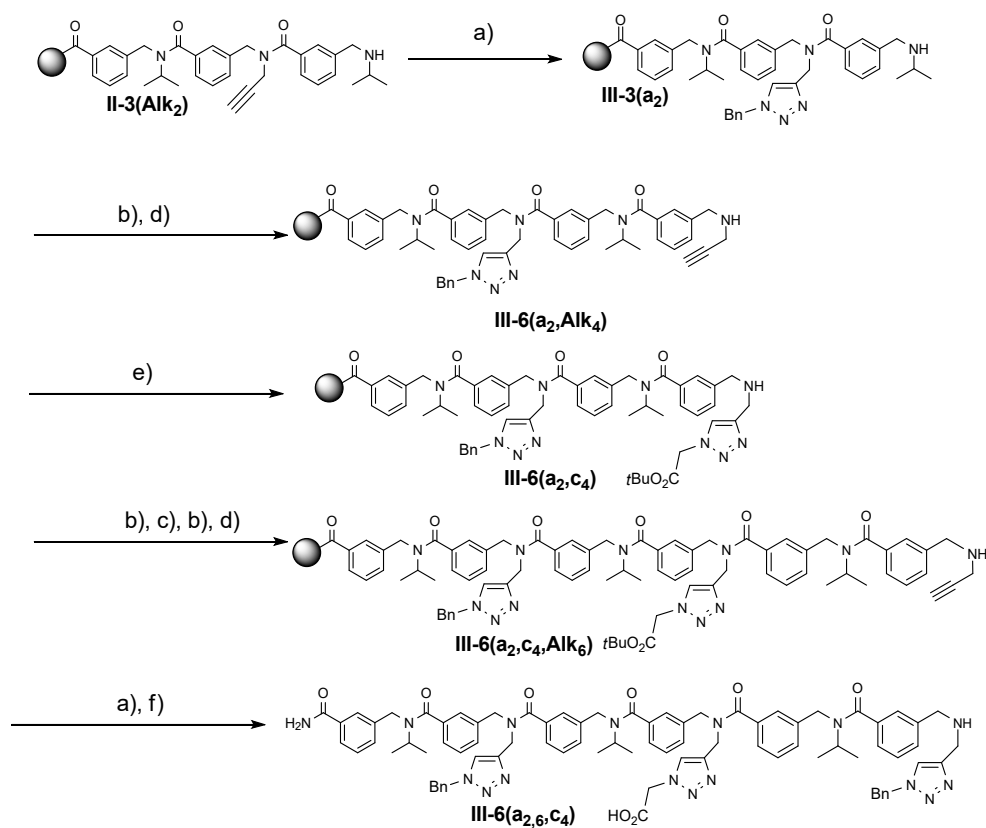

a) DCM/MeOH (v/v=8/2), Cata (5mol-%), **1a**, 50°C. b) 3-(chloromethyl)-benzoyl chloride, DIPEA, DCM, RT. c) *isopropyl* amine, dmsO, 50°C. d) Propargyl amine, dmsO, 50°C. e) DCM/MeOH (v/v=8/2), Cata (5mol-%), **1c**, 50°C. f) TFA/H<sub>2</sub>O/tri *isopropyl* silane (95/2.5/2.5).

## 6.2- Characterisation data

### 6.2.1- Synthesis of meta-arylopeptoid hexamer, III-6-(a<sub>2</sub>,c<sub>4,6</sub>):

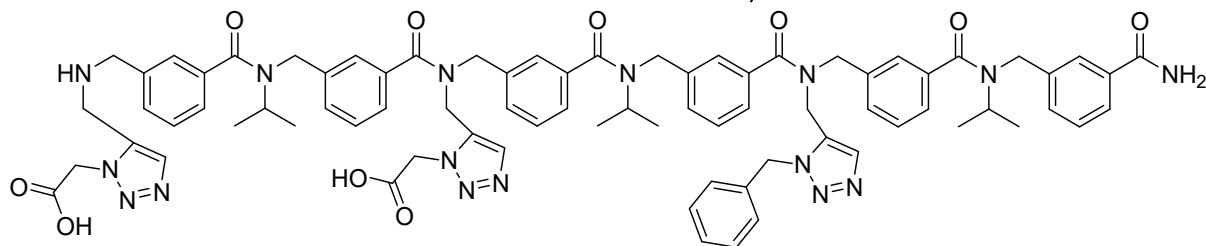

$m_{\text{crude}} = 118 \text{ mg}$  (purity 81%), crude yield 157%

$m_{\text{pure}} = 63 \text{ mg}$ , (purity 85%), isolated yield 84%

HRMS (TOF MS ES<sup>+</sup>):  $m/z$  calcd for C<sub>77</sub>H<sub>83</sub>N<sub>16</sub>O<sub>10</sub> [M+H]<sup>+</sup>: 1391.64726 found: 1391.6487 (1.02 ppm)

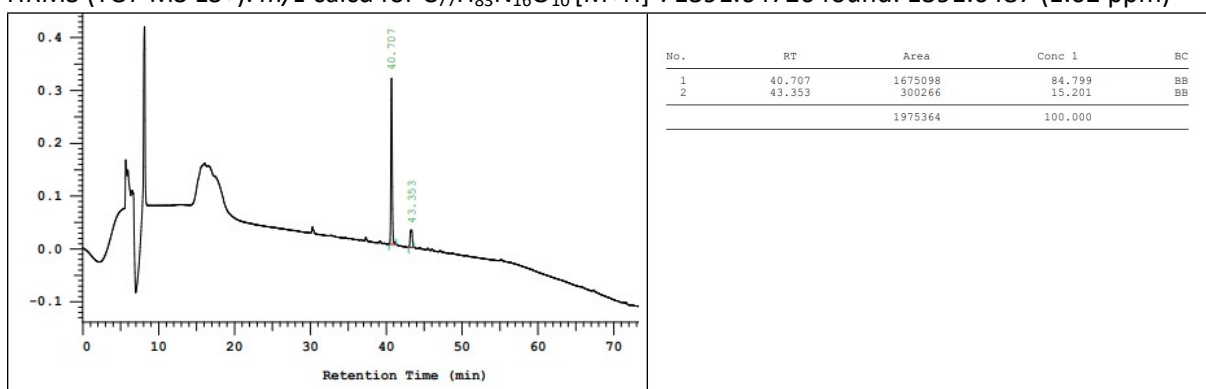

Figure S75 HPLC chromatogram of purified III-6-(a<sub>2</sub>,c<sub>4,6</sub>).

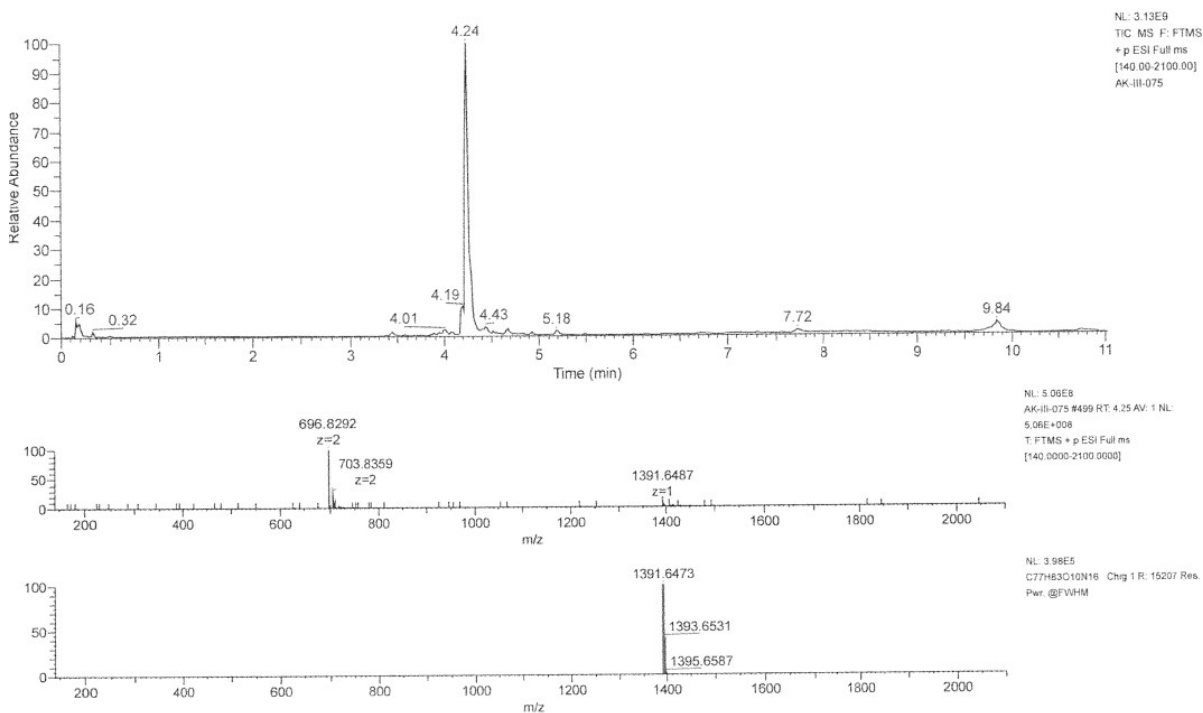

Figure S76 LCMS spectra of III-6-(a<sub>2</sub>,c<sub>4,6</sub>).



### 6.2.2-Synthesis of meta-arylopeptoid hexamer, III-6-(a<sub>4</sub>c<sub>2</sub>,6):

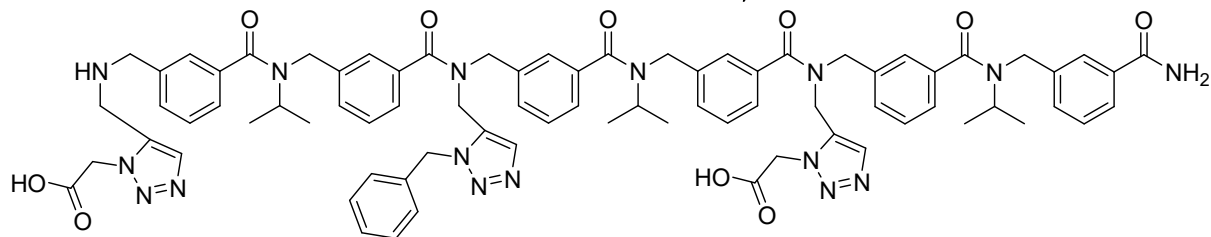

$m_{\text{crude}} = 109 \text{ mg}$ , (Purity 85%), crude yield 145%

$m_{\text{pure}} = 70 \text{ mg}$ , (Purity 97%), isolated yield 93%

HRMS (TOF MS ES+):  $m/z$  calcd for  $C_{77}H_{83}N_{16}O_{10}$  [M+H]<sup>+</sup>: 1391.64726 found: 1391.6487 (1.02 ppm)

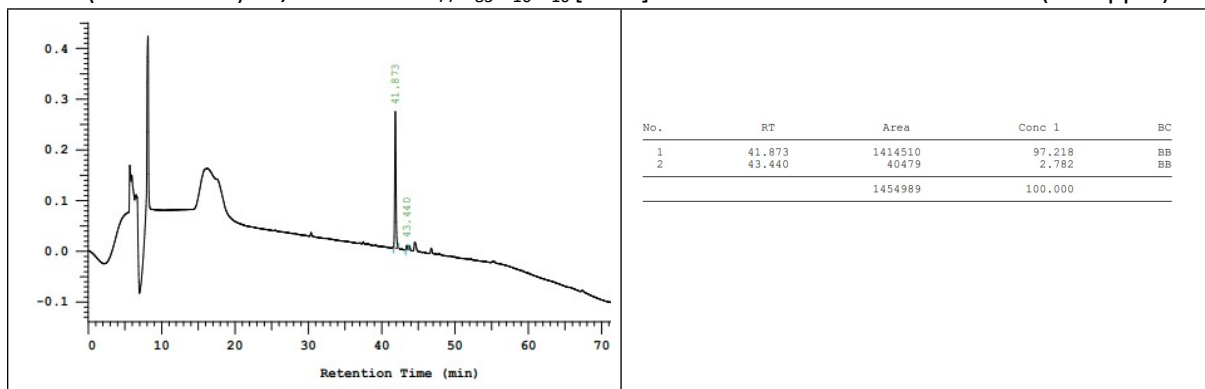

Figure S77 HPLC chromatogram of purified III-6-(a<sub>4</sub>c<sub>2</sub>,6).

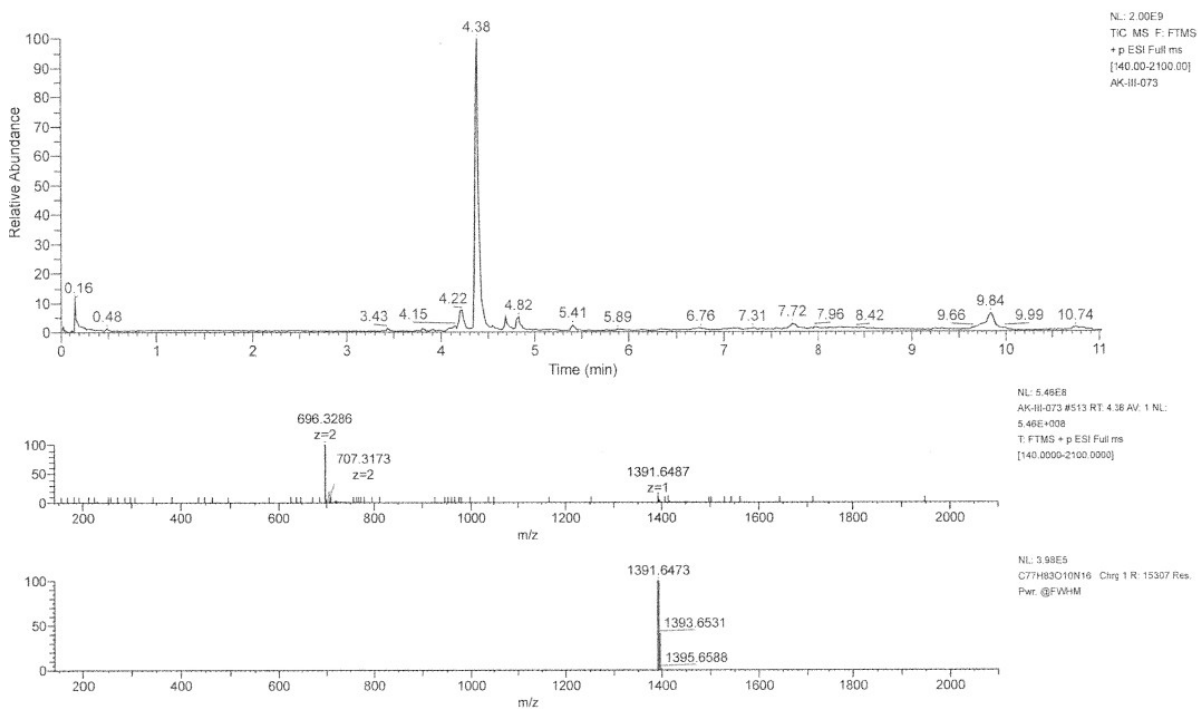

Figure S78 LCMS spectra of purified III-6-(a<sub>4</sub>c<sub>2</sub>,6).

### 6.2.3- Synthesis of meta-arylopeptoid hexamer, III-6-(a<sub>6</sub>,c<sub>2,4</sub>):

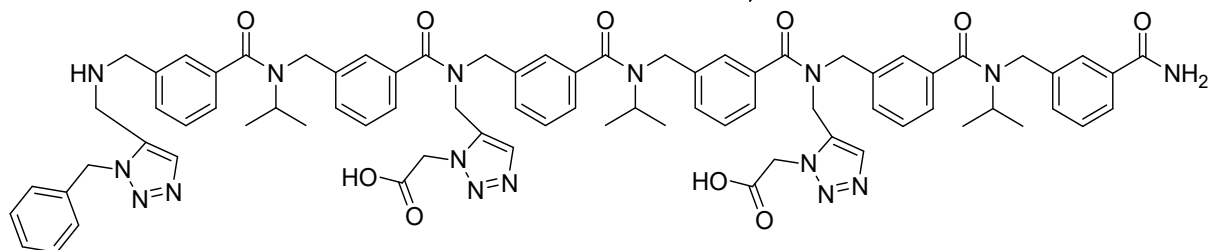

$m_{\text{crude}} = 112 \text{ mg}$ , (Purity 69%), crude yield 149%

$m_{\text{pure}} = 50 \text{ mg}$ , (Purity 87%), isolated yield 67%

HRMS (TOF MS ES<sup>+</sup>):  $m/z$  calcd for C<sub>77</sub>H<sub>83</sub>N<sub>16</sub>O<sub>10</sub> [M+H]<sup>+</sup>: 1391.64726 found: 1391.6487 (1.02 ppm)

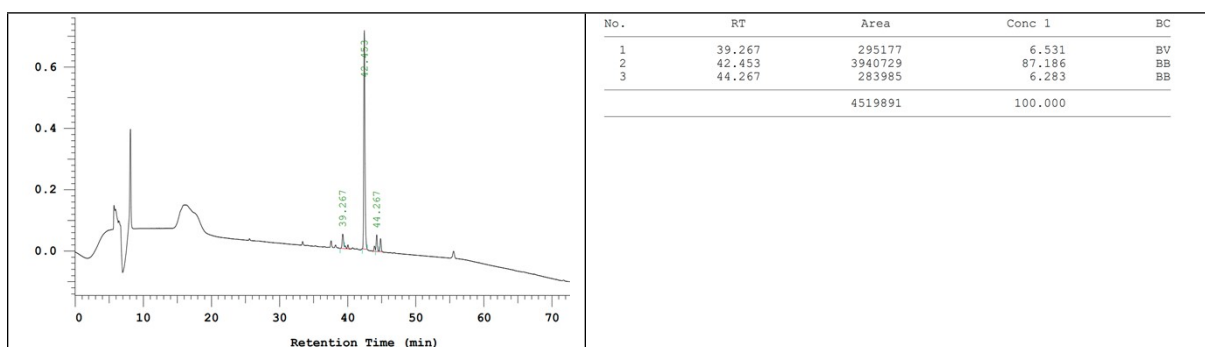

Figure S79 HPLC chromatogram of purified III-6-(a<sub>6</sub>,c<sub>2,4</sub>).

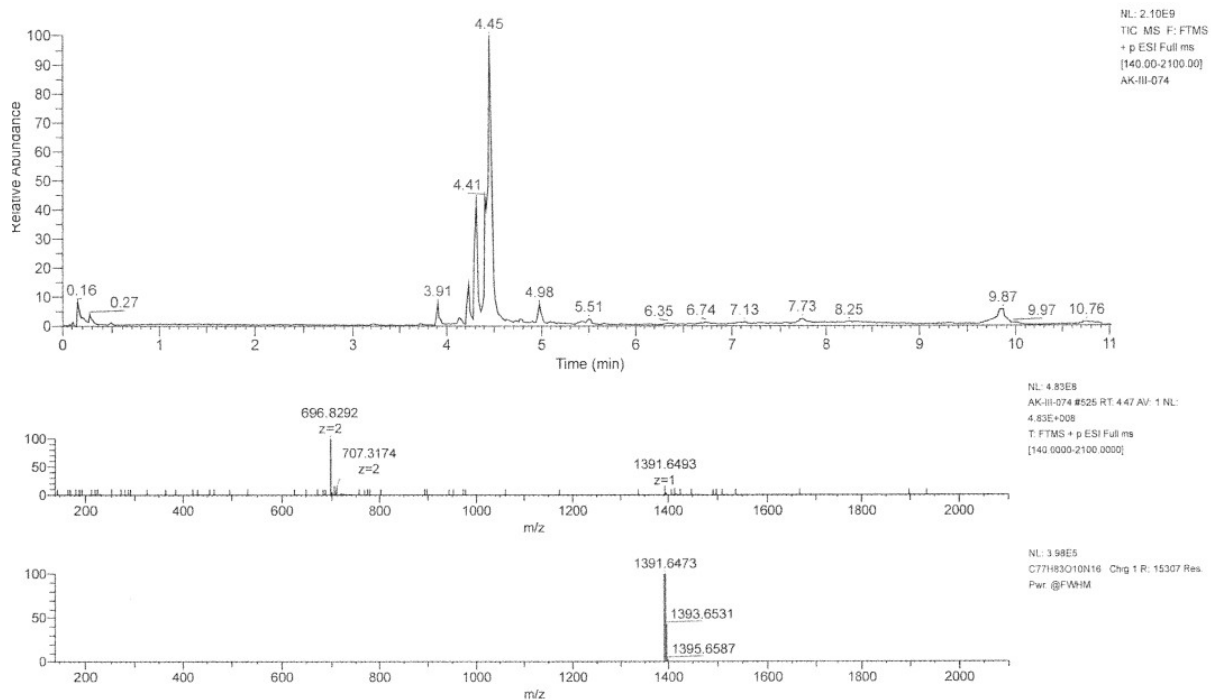

Figure S80 LCMS spectra of III-6-(a<sub>6</sub>,c<sub>2,4</sub>).

6.2.4- Synthesis of meta-arylopeptoid hexamer, III-6-(a<sub>2,4</sub>,c<sub>6</sub>):

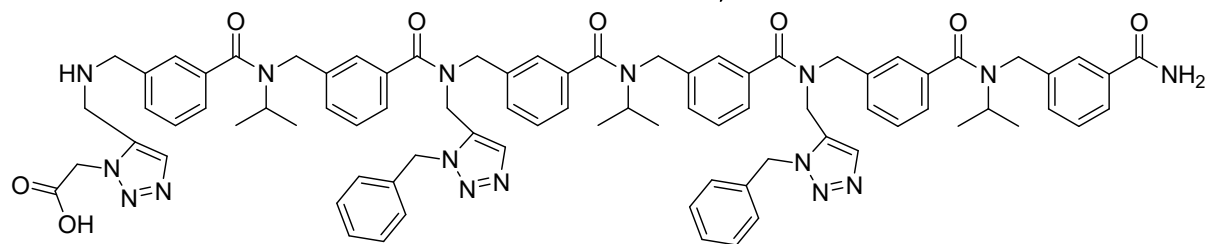

$m_{\text{crude}} = 23.65 \text{ mg}$ , (Purity 78%), crude yield 105%

$m_{\text{pure}} = 20.1 \text{ mg}$ , (purity 83%), isolated yield 90%.

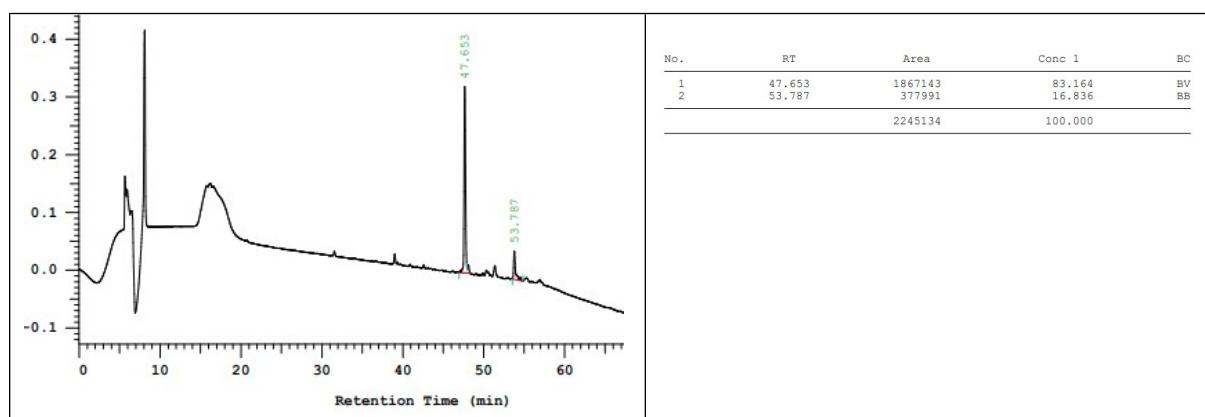

Figure S81 HPLC chromatogram of purified III-6-(a<sub>2,4</sub>,c<sub>6</sub>).

6.2.5- Synthesis of meta-arylopeptoid hexamer, III-6-(a<sub>4,6</sub>,c<sub>2</sub>):

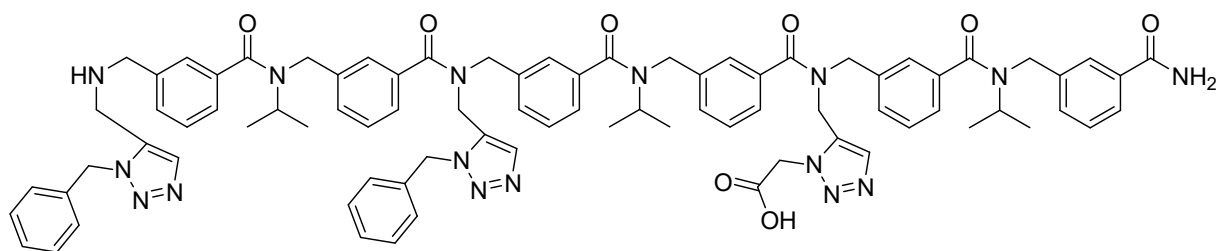

$m_{\text{crude}} = 24.6 \text{ mg}$ , (purity 82%), crude yield 109 %

$m_{\text{pure}} = 18.6 \text{ mg}$  (purity 92%), isolated yield 83%

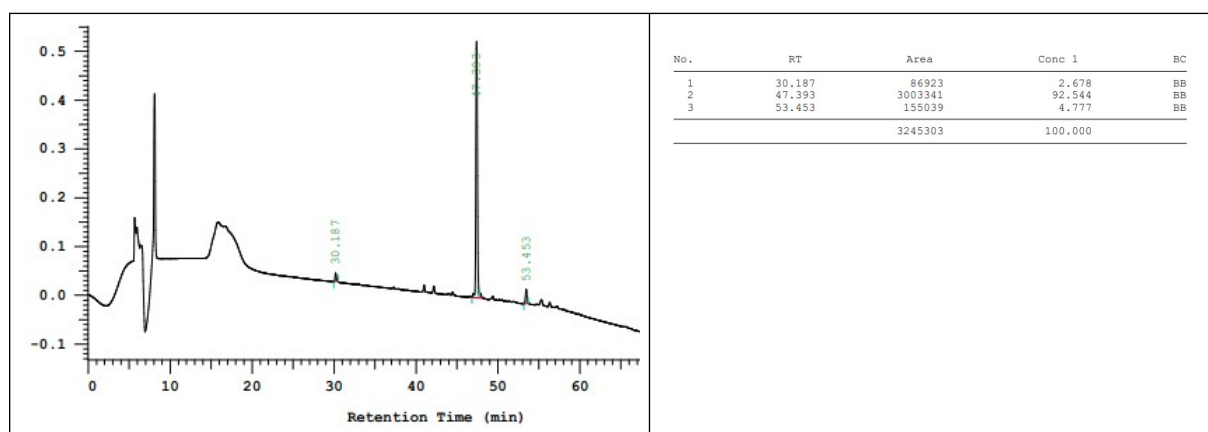

Figure S82 HPLC chromatogram of purified III-6-(a<sub>4,6</sub>,c<sub>2</sub>).

### 6.2.6- Synthesis of meta-arylopeptoid hexamer, III-6-(a<sub>2,6</sub>,c<sub>4</sub>):

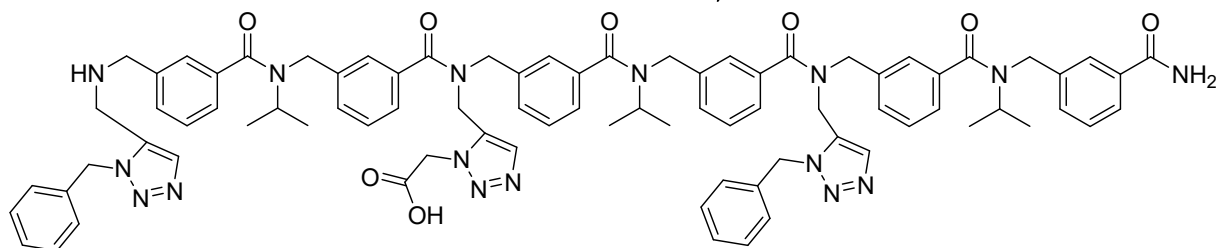

m<sub>crude</sub> = 25 mg (purity 87%), crude yield 111%

m<sub>pure</sub> = 19 mg (purity 93%), isolated yield 84%

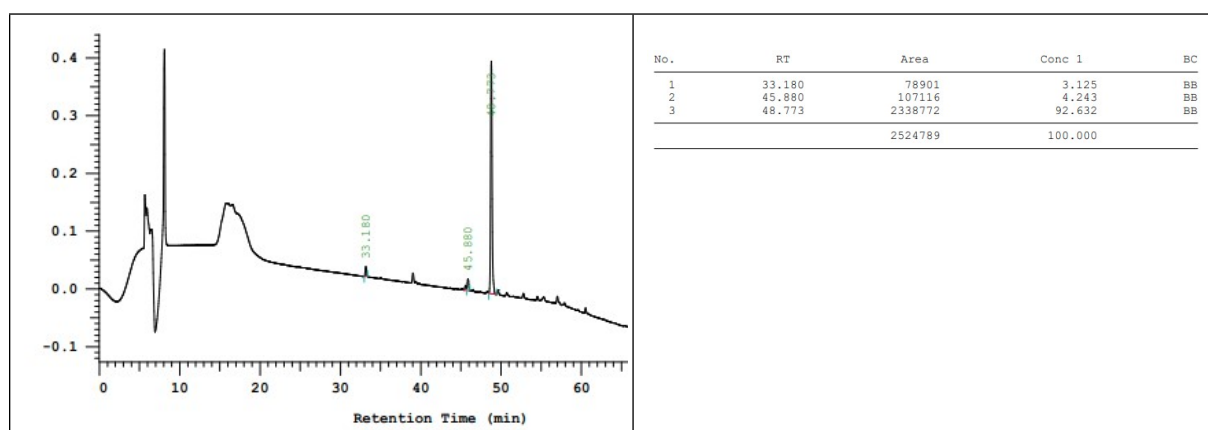

Figure S83 HPLC chromatogram of purified III-6-(a<sub>2,6</sub>,c<sub>4</sub>)

6.2.7- Synthesis of meta-arylopeptoid hexamer, III-4(d<sub>2</sub>,e<sub>4</sub>):

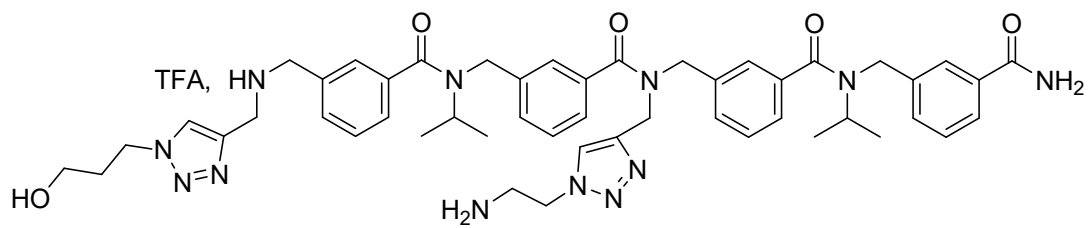

$m_{\text{crude}} = 16.7 \text{ mg}$  (purity 87%), crude yield 117%

$m_{\text{pure}} = 11.6 \text{ mg}$  (purity 92%), isolated yield 82%

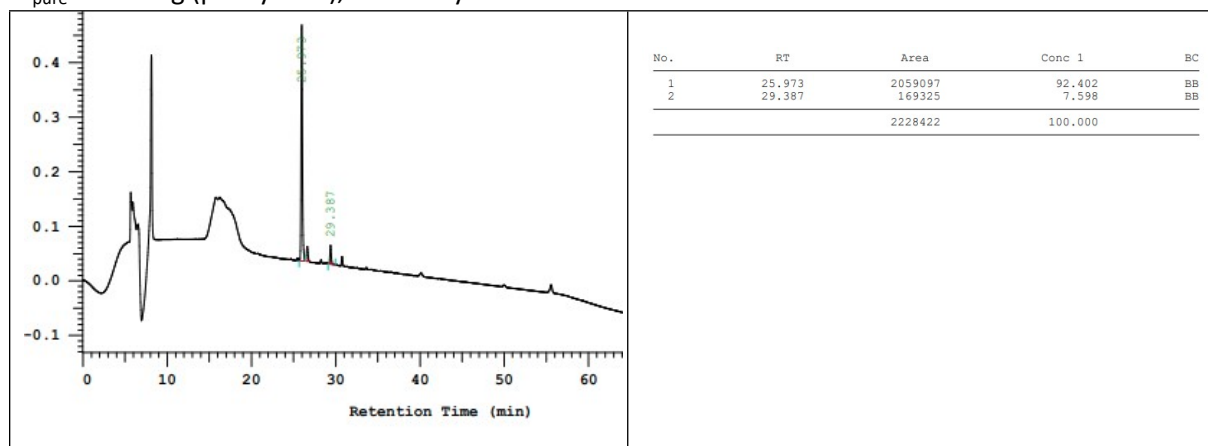

Figure S84 HPLC chromatogram of purified III-4(d<sub>2</sub>,e<sub>4</sub>).

6.2.8- Synthesis of meta-arylopeptoid Hexamer, III-4(e<sub>2</sub>,d<sub>4</sub>):

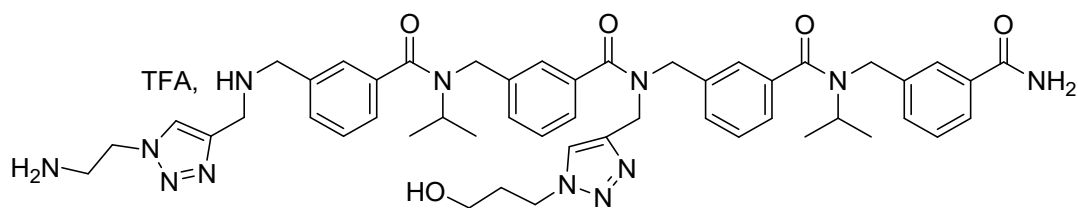

$m_{\text{crude}} = 17.2 \text{ mg}$ , (purity 83%) crude yield 121%

$m_{\text{pure}} = 11.2 \text{ mg}$ , (purity 87%), isolated yield 79%

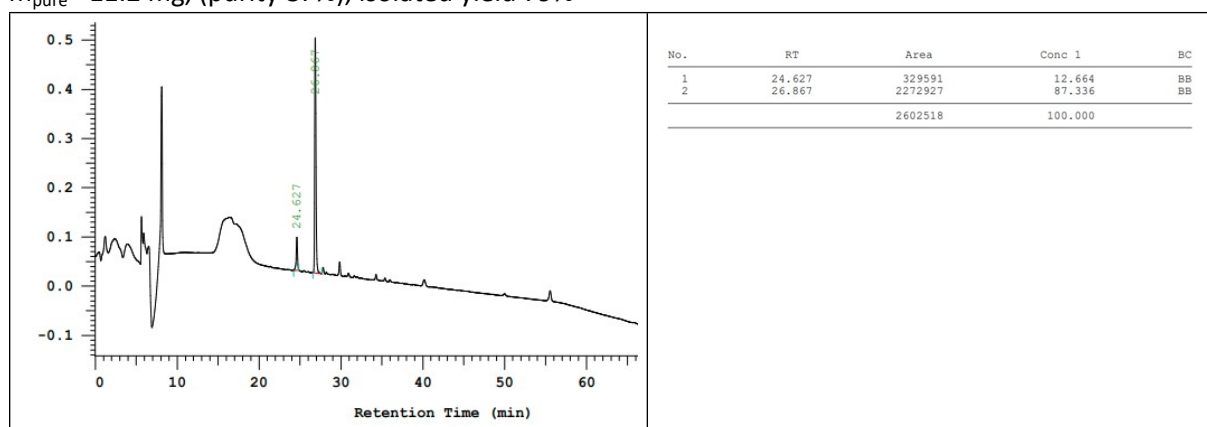

Figure S85 HPLC chromatogram of purified III-4(e<sub>2</sub>,d<sub>4</sub>).

7-Table of retention times.

| Arylopeptoid             | Retention time | Identification                                |
|--------------------------|----------------|-----------------------------------------------|
| <b>III-4-(e,d)(2,4)</b>  | 26.0           | <b>III-4(d<sub>2</sub>,e<sub>4</sub>)</b>     |
|                          | 26.9           | <b>III-4(d<sub>4</sub>,e<sub>2</sub>)</b>     |
| <b>III-6(a,c)(2,4,6)</b> | 40.8           | <b>III-6-(a<sub>2</sub>)(c<sub>4,6</sub>)</b> |
|                          | 41.8           | <b>III-6-(a<sub>4</sub>)(c<sub>2,6</sub>)</b> |
|                          | 42.5           | <b>III-6-(a<sub>6</sub>)(c<sub>2,4</sub>)</b> |
|                          | 47.7           | <b>III-6-(c<sub>2</sub>)(a<sub>4,6</sub>)</b> |
|                          | 48             | <b>III-6-(c<sub>6</sub>)(a<sub>2,4</sub>)</b> |
|                          | 49.1           | <b>III-6-(c<sub>4</sub>)(a<sub>2,6</sub>)</b> |

Table S1: HPLC retention time for each tetrameric and hexameric regioisomers



## 8-References

---

- <sup>1</sup> A. Maisoniai, P. Serafin, M. Traikia, E. Debiton, V. Thery, D. J. Aitken, P. Lemoine, B. Viossat, A. Gautier, *Eur. J. Inorg. Chem.*, **2008**, 298- 305.
- <sup>2</sup> R. Shyam, N. Charbonnel, A. Job, C. Blavignac, C. Forestier, C. Taillefumier, S. Faure, *ChemMedChem*, 2018, **10**, 1513-1516.
- <sup>3</sup> Obtain from bromo *tert*-butyl acetate according to A. T. Moore and H. N. Rydon, *Org. Synth.* **1965**, *45*, 47.
- <sup>4</sup> M. van Dijk, C. F. van Nostrum, W. E. Hennink, D. T. S. Rijkers, R. M. J. Liskamp, *Biomacromolecules* **2010**, *11*, 6, 1608–1614.
- <sup>5</sup> S. Depaifve, C. E. Federico, D. Ruch, S. Herman, A. Laachachi, *Carbon*, **2020**, *167*, 646-657.
- <sup>6</sup> T. Hjelmgaard , S. Faure, D. Staerck, C. Taillefumier, J. Nielsen, *Org. Biomol. Chem.*, **2011**, *9*, 6832-6843
